# Supplementary material for: Multi-Scale Coral Reef and Seascape Habitat Variables Combine to Influence Reef Fish Assemblages
Source: MDPI journal article supplement (doi:10.3390/fishes9040137), 2024-04-15
Supplement: s1 [file s1]

**Appendix Table 3.** Full species list from survey transects of fishes on coral reef habitat.

**Acanthuridae**

*Acanthurus mata*  
*Acanthurus nigricans*  
*Acanthurus nigricauda*  
*Acanthurus nigrofusus*  
*Acanthurus pyroferus*  
*Acanthurus sp.*  
*Acanthurus thompsoni*  
*Acanthurus triostegus*  
*Ctenochaetus binotatus*  
*Ctenochaetus cyanocheilus*  
*Ctenochaetus sp.*  
*Ctenochaetus striatus*  
*Ctenochaetus tominiensis*  
*Naso brevirostris*  
*Naso hexacanthus*  
*Naso lituratus*  
*Naso minor*  
*Naso sp.*  
*Naso unicornis*  
*Naso vlamingii*  
*Zebrasoma scopas*  
*Zebrasoma veliferum*

**Balistidae**

*Balistoides viridescens*

**Caesionidae**

*Caesio caeruleaurea*  
*Caesio sp.*  
*Caesio teres*  
*Pterocaesio pisang*  
*Pterocaesio tile*

**Carangidae**

*Caranx melampygus*  
*Caranx sp.*  
*Elagatis bipinnulata*

**Chaetodontidae**

*Chaetodon adiergastos*  
*Chaetodon auriga*  
*Chaetodon baronessa*  
*Chaetodon kleinii*  
*Chaetodon lineolatus*  
*Chaetodon lunula*  
*Chaetodon lunulatus*  
*Chaetodon melannotus*  
*Chaetodon mertensii*  
*Chaetodon ocellicaudus*  
*Chaetodon octofasciatus*  
*Chaetodon ornatissimus*

**Chaetodontidae (cont.)**

*Chaetodon pelewensis*  
*Chaetodon punctatofasciatus*  
*Chaetodon rafflesii*  
*Chaetodon sp.*  
*Chaetodon ulietensis*  
*Chaetodon unimaculatus*  
*Chaetodon vagabundus*  
*Chelmon sp.*  
*Coradion sp.*  
*Forcipiger flavissimus*  
*Forcipiger longirostris*  
*Hemitaenichthys polylepis*  
*Heniochus sp.*

**Ephippidae**

*Platax sp.*

**Haemulidae**

*Plectorhinchus chaetodonoides*  
*Plectorhinchus lineatus*  
*Plectorhinchus sp.*  
*Plectorhinchus vittatus*

**Kyphosidae**

*Kyphosus sp.*

**Labridae**

*Anampses caeruleopunctatus*  
*Anampses geographicus*  
*Anampses meleagrides*  
*Anampses sp.*  
*Anampses twistii*  
*Bodianus dictynna*  
*Bodianus mesothorax*  
*Bodianus sp.*  
*Cheilinus chlorourus*  
*Cheilinus fasciatus*  
*Cheilinus oxycephalus*  
*Cheilinus trilobatus*  
*Cheilio inermis*  
*Choerodon anchorago*  
*Choerodon sp.*  
*Cirrhilabrus sp.*  
*Coris batuensis*  
*Coris gaimard*  
*Epibulus brevis*  
*Epibulus insidiator*  
*Gomphosus varius*  
*Halichoeres chrysus*  
*Halichoeres hortulanus*  
*Halichoeres marginatus*

**Labridae (cont.)**

*Halichoeres melanurus*  
*Halichoeres nigrescens*  
*Halichoeres podostigma*  
*Halichoeres prosopeion*  
*Halichoeres richmondi*  
*Halichoeres scapularis*  
*Halichoeres sp.*  
*Hemigymnus fasciatus*  
*Hemigymnus melapterus*  
*Hologymnosus annulatus*  
*Hologymnosus doliatus*  
*Hologymnosus sp.*  
*Labrichthys unilineatus*  
*Labrid sp.*  
*Labroides dimidiatus*  
*Labroides sp.*  
*Labropsis manabei*  
*Labropsis xanthonota*  
*Macropharyngodon meleagris*  
*Macropharyngodon negrosensis*  
*Novaculichthys taeniourus*  
*Oxycheilinus celebicus*  
*Oxycheilinus digramma*  
*Oxycheilinus sp.*  
*Oxycheilinus unifasciatus*  
*Pseudocheilinus evanidus*  
*Pseudocheilinus hexataenia*  
*Pseudodax moluccanus*  
*Stethojulis bandanensis*  
*Stethojulis interrupta*  
*Stethojulis strigiventer*  
*Thalassoma amblycephalum*  
*Thalassoma hardwicke*  
*Thalassoma janseni*  
*Thalassoma lunare*

**Labridae (Scarinae)**

*Cetoscarus ocellatus*  
*Chlorurus bleekeri*  
*Chlorurus bowersi*  
*Chlorurus microrhinos*  
*Chlorurus sp.*  
*Chlorurus spilurus*  
*Hipposcarus longiceps*  
*Scarus chameleon*  
*Scarus dimidiatus*  
*Scarus flavipectoralis*  
*Scarus forsteni*

**Labridae (Scarinae) (cont.)**

*Scarus ghobban*  
*Scarus hypselopterus*  
*Scarus niger*  
*Scarus prasiognathos*  
*Scarus psitticus*  
*Scarus rivulatus*  
*Scarus schlegeli*  
*Scarus sp.*  
*Scarus tricolor*

**Lethrinidae**

*Lethrinus erythracanthus*  
*Lethrinus erythropterus*  
*Lethrinus harak*  
*Lethrinus obsoletus*  
*Lethrinus ornatus*  
*Lethrinus sp.*  
*Monotaxis grandoculis*

**Lutjanidae**

*Aprion virescens*  
*Lutjanus biguttatus*  
*Lutjanus bohar*  
*Lutjanus decussatus*  
*Lutjanus ehrenbergii*  
*Lutjanus fulviflamma*  
*Lutjanus fulvus*  
*Lutjanus monostigma*  
*Macolor macularis*

**Mullidae**

*Mulloidichthys flavolineatus*  
*Parupeneus barberinoides*  
*Parupeneus barberinus*  
*Parupeneus crassilabris*  
*Parupeneus cyclostomus*  
*Parupeneus multifasciatus*  
*Parupeneus sp.*

**Nemipteridae**

*Scolopsis bilineatus*  
*Scolopsis sp.*

**Plotosidae**

*Plotosus lineatus*

**Pomacanthidae**

*Apolemichthys trimaculatus*  
*Centropyge bicolor*  
*Centropyge bispinosa*  
*Centropyge nox*  
*Centropyge tibicen*  
*Centropyge vrolikii*

**Pomacanthidae (cont.)**

*Chaetodontoplus mesoleucus*  
*Genicanthus lamarck*  
*Pomacanthus navarchus*  
*Pomacanthus sexstriatus*  
*Pomacanthus xanthometopon*  
*Pygoplites diacanthus*

**Pomacentridae**

*Amblyglyphidodon aureus*  
*Amblyglyphidodon curacao*  
*Amblyglyphidodon leucogaster*  
*Amphiprion ocellaris*  
*Amphiprion sp.*  
*Chromis amboinensis*  
*Chromis analis*  
*Chromis atripectoralis*  
*Chromis lepidolepis*  
*Chromis margaritifer*  
*Chromis reticulatus*  
*Chromis retrofasciata*  
*Chromis ternatensis*  
*Chromis viridis*  
*Chrysiptera rollandi*  
*Chrysiptera springeri*  
*Chrysiptera talboti*  
*Dascyllus aruanus*  
*Dascyllus reticulatus*  
*Dascyllus trimaculatus*  
*Dischistodus melanotus*  
*Dischistodus perspicillatus*  
*Hemiglyphidodon plagiometopon*  
*Neoglyphidodon nigroris*  
*Plectroglyphidodon lacrymatus*  
*Pomacentrus adelus*  
*Pomacentrus alexanderae*  
*Pomacentrus amboinensis*  
*Pomacentrus bankanensis*  
*Pomacentrus brachialis*  
*Pomacentrus coelestis*  
*Pomacentrus lepidogenys*  
*Pomacentrus moluccensis*  
*Pomacentrus nagasakiensis*  
*Pomacentrus sp.*  
*Pomacentrus stigma*  
*Stegastes sp.*

**Scombridae**

*Rastrelliger kanagurta*

**Serranidae**

*Cephalopholis argus*  
*Cephalopholis cyanostigma*  
*Cephalopholis microprion*  
*Cephalopholis miniata*  
*Cephalopholis urodeta*  
*Epinephelus erythrurus*  
*Epinephelus fasciatus*  
*Epinephelus merra*  
*Epinephelus ongus*  
*Epinephelus polyphekadion*  
*Epinephelus sp.*  
*Plectropomus areolatus*  
*Plectropomus leopardus*  
*Plectropomus oligacanthus*  
*Variola louti*

**Serranidae (Anthiinae)**

*Pseudanthias huchtii*  
*Pseudanthias pascalus*  
*Pseudanthias squamipinnis*

**Siganidae**

*Siganus doliatus*  
*Siganus guttatus*  
*Siganus puellus*  
*Siganus punctatissimus*  
*Siganus punctatus*  
*Siganus sp.*  
*Siganus spinus*  
*Siganus unimaculatus*  
*Siganus vermiculatus*  
*Siganus virgatus*  
*Siganus vulpinus*

**Sphyraenidae**

*Sphyraena obtusata*  
*Sphyraena sp.*

**Zanclidae**

*Zanclus cornutus*
