# Supplementary material for: Multi-Scale Coral Reef and Seascape Habitat Variables Combine to Influence Reef Fish Assemblages
Source: MDPI journal article supplement (doi:10.3390/fishes9040137), 2024-04-15
Supplement: s1 [file s1]

**Appendix Table 5.** Output for SIMPER analysis for all species (A), parrotfish (B), and wrasse (C). For the all species analysis (A) only the top 50 records are displayed. Comparison is the comparison between different habitat clusters. A.MG/A.Sand is the cluster for area of mangrove and area of sand. Rub/EAM is the cluster describing rubble and EAM. Coral/A.MA is the cluster for coral cover and area of macroalgae. A.SG/Soft Coral describe the cluster for area of seagrass and soft coral cover. A.CR/A.RF is the cluster for area of coral reef and area of reef flat. Average is the average contribution to the overall dissimilarity. Overall is the overall between-group dissimilarity. Sd is the standard deviation of contribution. Ratio is the average to sd ratio. Ava is the average abundance of the first cluster. Avb is the average abundance of the second cluster in the comparison. Ord is an index vector to order vectors by their contribution. Cumsum is the ordered cumulative contribution. P is the p-value from the permutation tests to identify species significantly driving differences between assemblages.

A. All species SIMPER analysis.

| Comparison             | species                          | average | overall | sd    | ratio | ava   | avb   | ord | cusum | p     |
|------------------------|----------------------------------|---------|---------|-------|-------|-------|-------|-----|-------|-------|
| A.MG/A.Sand vs Rub/EAM | <i>Acanthurus nigricans</i>      | 0.002   | 0.737   | 0.007 | 0.300 | 0.004 | 0.000 | 209 | 0.022 | 0.174 |
| A.MG/A.Sand vs Rub/EAM | <i>Acanthurus nigricauda</i>     | 0.000   | 0.737   | 0.000 | NA    | 0.000 | 0.000 | 122 | 0.043 | 1     |
| A.MG/A.Sand vs Rub/EAM | <i>Acanthurus nigrofuscus</i>    | 0.007   | 0.737   | 0.010 | 0.663 | 0.010 | 0.006 | 65  | 0.063 | 0.003 |
| A.MG/A.Sand vs Rub/EAM | <i>Acanthurus pyroferus</i>      | 0.006   | 0.737   | 0.009 | 0.654 | 0.009 | 0.005 | 8   | 0.083 | 0.374 |
| A.MG/A.Sand vs Rub/EAM | <i>Acanthurus sp.</i>            | 0.000   | 0.737   | 0.000 | NA    | 0.000 | 0.000 | 115 | 0.101 | 1     |
| A.MG/A.Sand vs Rub/EAM | <i>Acanthurus thompsoni</i>      | 0.000   | 0.737   | 0.000 | NA    | 0.000 | 0.000 | 206 | 0.119 | 1     |
| A.MG/A.Sand vs Rub/EAM | <i>Acanthurus triostegus</i>     | 0.000   | 0.737   | 0.000 | NA    | 0.000 | 0.000 | 162 | 0.136 | 1     |
| A.MG/A.Sand vs Rub/EAM | <i>Ctenochaetus binotatus</i>    | 0.015   | 0.737   | 0.011 | 1.335 | 0.017 | 0.035 | 164 | 0.153 | 0.002 |
| A.MG/A.Sand vs Rub/EAM | <i>Ctenochaetus cyanocheilus</i> | 0.000   | 0.737   | 0.000 | NA    | 0.000 | 0.000 | 178 | 0.169 | 1     |
| A.MG/A.Sand vs Rub/EAM | <i>Ctenochaetus sp.</i>          | 0.001   | 0.737   | 0.005 | 0.308 | 0.003 | 0.000 | 11  | 0.185 | 0.441 |
| A.MG/A.Sand vs Rub/EAM | <i>Ctenochaetus striatus</i>     | 0.012   | 0.737   | 0.009 | 1.249 | 0.024 | 0.023 | 133 | 0.200 | 0.006 |
| A.MG/A.Sand vs Rub/EAM | <i>Ctenochaetus tominiensis</i>  | 0.003   | 0.737   | 0.007 | 0.423 | 0.000 | 0.006 | 73  | 0.215 | 0.81  |
| A.MG/A.Sand vs Rub/EAM | <i>Naso brevirostris</i>         | 0.000   | 0.737   | 0.000 | NA    | 0.000 | 0.000 | 159 | 0.230 | 1     |
| A.MG/A.Sand vs Rub/EAM | <i>Naso hexacanthus</i>          | 0.003   | 0.737   | 0.008 | 0.351 | 0.005 | 0.000 | 131 | 0.245 | 0.671 |
| A.MG/A.Sand vs Rub/EAM | <i>Naso lituratus</i>            | 0.003   | 0.737   | 0.006 | 0.480 | 0.004 | 0.002 | 134 | 0.260 | 0.945 |
| A.MG/A.Sand vs Rub/EAM | <i>Naso minor</i>                | 0.003   | 0.737   | 0.005 | 0.648 | 0.000 | 0.007 | 211 | 0.275 | 0.147 |
| A.MG/A.Sand vs Rub/EAM | <i>Naso sp.</i>                  | 0.000   | 0.737   | 0.000 | NA    | 0.000 | 0.000 | 34  | 0.289 | 1     |
| A.MG/A.Sand vs Rub/EAM | <i>Naso unicornis</i>            | 0.002   | 0.737   | 0.005 | 0.358 | 0.001 | 0.003 | 130 | 0.304 | 0.997 |
| A.MG/A.Sand vs Rub/EAM | <i>Naso vlamingii</i>            | 0.001   | 0.737   | 0.004 | 0.288 | 0.000 | 0.002 | 77  | 0.318 | 0.418 |
| A.MG/A.Sand vs Rub/EAM | <i>Zebrasoma scopas</i>          | 0.005   | 0.737   | 0.007 | 0.687 | 0.001 | 0.010 | 123 | 0.331 | 0.988 |

|                        |                                    |         |         |       |       |       |       |     |       |       |
|------------------------|------------------------------------|---------|---------|-------|-------|-------|-------|-----|-------|-------|
| A.MG/A.Sand vs Rub/EAM | <i>Zebrasoma veliferum</i>         | 0.000   | 0.737   | 0.000 | NA    | 0.000 | 0.000 | 91  | 0.345 | 1     |
| A.MG/A.Sand vs Rub/EAM | <i>Balistoides viridescens</i>     | 0.000   | 0.737   | 0.000 | NA    | 0.000 | 0.000 | 195 | 0.358 | 1     |
| A.MG/A.Sand vs Rub/EAM | <i>Caesio caeruleaurea</i>         | 0.000   | 0.737   | 0.000 | NA    | 0.000 | 0.000 | 208 | 0.371 | 1     |
| A.MG/A.Sand vs Rub/EAM | <i>Caesio sp.</i>                  | 0.000   | 0.737   | 0.000 | NA    | 0.000 | 0.000 | 205 | 0.384 | 1     |
| A.MG/A.Sand vs Rub/EAM | <i>Caesio teres</i>                | 0.000   | 0.737   | 0.000 | NA    | 0.000 | 0.000 | 84  | 0.397 | 1     |
| A.MG/A.Sand vs Rub/EAM | <i>Pterocaesio pisang</i>          | 0.002   | 0.737   | 0.006 | 0.304 | 0.003 | 0.000 | 83  | 0.410 | 0.436 |
| A.MG/A.Sand vs Rub/EAM | <i>Pterocaesio tile</i>            | 0.001   | 0.737   | 0.004 | 0.288 | 0.000 | 0.002 | 104 | 0.423 | 0.361 |
| A.MG/A.Sand vs Rub/EAM | <i>Caranx melampygus</i>           | 0.000   | 0.737   | 0.000 | NA    | 0.000 | 0.000 | 78  | 0.436 | 1     |
| A.MG/A.Sand vs Rub/EAM | <i>Caranx sp.</i>                  | 0.000   | 0.737   | 0.000 | NA    | 0.000 | 0.000 | 129 | 0.448 | 1     |
| A.MG/A.Sand vs Rub/EAM | <i>Elagatis bipinnulata</i>        | 0.000   | 0.737   | 0.000 | NA    | 0.000 | 0.000 | 190 | 0.460 | 1     |
| A.MG/A.Sand vs Rub/EAM | <i>Chaetodon adiergastos</i>       | 0.000   | 0.737   | 0.000 | NA    | 0.000 | 0.000 | 126 | 0.473 | 1     |
| A.MG/A.Sand vs Rub/EAM | <i>Chaetodon auriga</i>            | 0.000   | 0.737   | 0.000 | NA    | 0.000 | 0.000 | 70  | 0.485 | 1     |
| A.MG/A.Sand vs Rub/EAM | <i>Chaetodon baronessa</i>         | 0.007   | 0.737   | 0.011 | 0.664 | 0.002 | 0.013 | 171 | 0.497 | 0.974 |
| A.MG/A.Sand vs Rub/EAM | <i>Chaetodon kleinii</i>           | 0.011   | 0.737   | 0.011 | 0.957 | 0.018 | 0.012 | 128 | 0.508 | 0.084 |
| A.MG/A.Sand vs Rub/EAM | <i>Chaetodon lineolatus</i>        | 0.000   | 0.737   | 0.000 | NA    | 0.000 | 0.000 | 140 | 0.519 | 1     |
| A.MG/A.Sand vs Rub/EAM | <i>Chaetodon lunula</i>            | 0.001   | 0.737   | 0.005 | 0.288 | 0.000 | 0.003 | 37  | 0.529 | 0.767 |
| A.MG/A.Sand vs Rub/EAM | <i>Chaetodon lunulatus</i>         | 0.008   | 0.737   | 0.011 | 0.711 | 0.003 | 0.014 | 59  | 0.539 | 0.673 |
| A.MG/A.Sand vs Rub/EAM | <i>Chaetodon melannotus</i>        | 0.000   | 0.737   | 0.000 | NA    | 0.000 | 0.000 | 79  | 0.549 | 1     |
| A.MG/A.Sand vs Rub/EAM | <i>Chaetodon mertensii</i>         | 0.000   | 0.737   | 0.000 | NA    | 0.000 | 0.000 | 33  | 0.559 | 1     |
| A.MG/A.Sand vs Rub/EAM | <i>Chaetodon ocellicaudus</i>      | 0.003   | 0.737   | 0.007 | 0.358 | 0.002 | 0.003 | 3   | 0.568 | 0.133 |
| A.MG/A.Sand vs Rub/EAM | <i>Chaetodon octofasciatus</i>     | 0.000   | 0.737   | 0.000 | NA    | 0.000 | 0.000 | 100 | 0.577 | 1     |
| A.MG/A.Sand vs Rub/EAM | <i>Chaetodon ornatissimus</i>      | 0.001   | 0.737   | 0.004 | 0.213 | 0.002 | 0.000 | 139 | 0.587 | 0.883 |
| A.MG/A.Sand vs Rub/EAM | <i>Chaetodon pelewensis</i>        | 0.000   | 0.737   | 0.000 | NA    | 0.000 | 0.000 | 97  | 0.596 | 1     |
| A.MG/A.Sand vs Rub/EAM | <i>Chaetodon punctatofasciatus</i> | 0.001   | 0.737   | 0.003 | 0.288 | 0.000 | 0.002 | 94  | 0.605 | 0.814 |
| A.MG/A.Sand vs Rub/EAM | <i>Chaetodon rafflesii</i>         | 0.000   | 0.737   | 0.000 | NA    | 0.000 | 0.000 | 232 | 0.614 | 1     |
| A.MG/A.Sand vs Rub/EAM | <i>Chaetodon sp.</i>               | 0.002   | 0.737   | 0.007 | 0.213 | 0.003 | 0.000 | 227 | 0.623 | 0.191 |
| A.MG/A.Sand vs Rub/EAM | <i>Chaetodon ulietensis</i>        | 0.000   | 0.737   | 0.000 | NA    | 0.000 | 0.000 | 106 | 0.632 | 1     |
| A.MG/A.Sand vs Rub/EAM | <i>Chaetodon unimaculatus</i>      | 0.000   | 0.737   | 0.000 | NA    | 0.000 | 0.000 | 132 | 0.641 | 1     |
| A.MG/A.Sand vs Rub/EAM | <i>Chaetodon vagabundus</i>        | 0.004   | 0.737   | 0.008 | 0.477 | 0.005 | 0.004 | 188 | 0.649 | 0.428 |
| A.MG/A.Sand vs Rub/EAM | <i>Chelmon sp.</i>                 | 0.000   | 0.737   | 0.000 | NA    | 0.000 | 0.000 | 4   | 0.658 | 1     |
| Comparison             | species                            | average | overall | sd    | ratio | ava   | avb   | ord | cusum | p     |

|                           |                                  |       |       |       |       |       |       |     |          |       |
|---------------------------|----------------------------------|-------|-------|-------|-------|-------|-------|-----|----------|-------|
| A.MG/A.Sand vs Coral/A.MA | <i>Acanthurus nigricans</i>      | 0.003 | 0.793 | 0.008 | 0.342 | 0.004 | 0.001 | 209 | 0.021677 | 0.019 |
| A.MG/A.Sand vs Coral/A.MA | <i>Acanthurus nigricauda</i>     | 0.001 | 0.793 | 0.003 | 0.179 | 0.000 | 0.001 | 65  | 0.04132  | 0.259 |
| A.MG/A.Sand vs Coral/A.MA | <i>Acanthurus nigrofuscus</i>    | 0.005 | 0.793 | 0.010 | 0.512 | 0.010 | 0.000 | 206 | 0.059913 | 0.014 |
| A.MG/A.Sand vs Coral/A.MA | <i>Acanthurus pyroferus</i>      | 0.006 | 0.793 | 0.009 | 0.682 | 0.009 | 0.005 | 115 | 0.075998 | 0.353 |
| A.MG/A.Sand vs Coral/A.MA | <i>Acanthurus sp.</i>            | 0.000 | 0.793 | 0.000 | NA    | 0.000 | 0.000 | 164 | 0.090321 | 1     |
| A.MG/A.Sand vs Coral/A.MA | <i>Acanthurus thompsoni</i>      | 0.001 | 0.793 | 0.004 | 0.258 | 0.000 | 0.002 | 34  | 0.104509 | 0.476 |
| A.MG/A.Sand vs Coral/A.MA | <i>Acanthurus triostegus</i>     | 0.000 | 0.793 | 0.003 | 0.179 | 0.000 | 0.001 | 37  | 0.118119 | 0.261 |
| A.MG/A.Sand vs Coral/A.MA | <i>Ctenochaetus binotatus</i>    | 0.010 | 0.793 | 0.008 | 1.128 | 0.017 | 0.013 | 162 | 0.131584 | 0.643 |
| A.MG/A.Sand vs Coral/A.MA | <i>Ctenochaetus cyanocheilus</i> | 0.001 | 0.793 | 0.003 | 0.179 | 0.000 | 0.001 | 11  | 0.144856 | 0.259 |
| A.MG/A.Sand vs Coral/A.MA | <i>Ctenochaetus sp.</i>          | 0.003 | 0.793 | 0.006 | 0.437 | 0.003 | 0.003 | 73  | 0.157649 | 0.017 |
| A.MG/A.Sand vs Coral/A.MA | <i>Ctenochaetus striatus</i>     | 0.011 | 0.793 | 0.006 | 1.671 | 0.024 | 0.026 | 33  | 0.170088 | 0.014 |
| A.MG/A.Sand vs Coral/A.MA | <i>Ctenochaetus tominiensis</i>  | 0.004 | 0.793 | 0.006 | 0.717 | 0.000 | 0.008 | 178 | 0.182477 | 0.398 |
| A.MG/A.Sand vs Coral/A.MA | <i>Naso brevirostris</i>         | 0.002 | 0.793 | 0.005 | 0.467 | 0.000 | 0.005 | 20  | 0.194799 | 0.236 |
| A.MG/A.Sand vs Coral/A.MA | <i>Naso hexacanthus</i>          | 0.005 | 0.793 | 0.008 | 0.618 | 0.005 | 0.006 | 122 | 0.206998 | 0.027 |
| A.MG/A.Sand vs Coral/A.MA | <i>Naso lituratus</i>            | 0.007 | 0.793 | 0.007 | 0.921 | 0.004 | 0.012 | 8   | 0.21899  | 0.007 |
| A.MG/A.Sand vs Coral/A.MA | <i>Naso minor</i>                | 0.002 | 0.793 | 0.004 | 0.393 | 0.000 | 0.003 | 211 | 0.230938 | 0.958 |
| A.MG/A.Sand vs Coral/A.MA | <i>Naso sp.</i>                  | 0.001 | 0.793 | 0.004 | 0.302 | 0.000 | 0.003 | 84  | 0.242839 | 0.128 |
| A.MG/A.Sand vs Coral/A.MA | <i>Naso unicornis</i>            | 0.007 | 0.793 | 0.007 | 0.944 | 0.001 | 0.013 | 83  | 0.254458 | 0.054 |
| A.MG/A.Sand vs Coral/A.MA | <i>Naso vlamingii</i>            | 0.000 | 0.793 | 0.003 | 0.179 | 0.000 | 0.001 | 159 | 0.265862 | 0.884 |
| A.MG/A.Sand vs Coral/A.MA | <i>Zebrasoma scopas</i>          | 0.010 | 0.793 | 0.006 | 1.556 | 0.001 | 0.020 | 208 | 0.277182 | 0.001 |
| A.MG/A.Sand vs Coral/A.MA | <i>Zebrasoma veliferum</i>       | 0.001 | 0.793 | 0.003 | 0.179 | 0.000 | 0.001 | 130 | 0.288412 | 0.25  |
| A.MG/A.Sand vs Coral/A.MA | <i>Balistoides viridescens</i>   | 0.000 | 0.793 | 0.003 | 0.179 | 0.000 | 0.001 | 68  | 0.299075 | 0.274 |
| A.MG/A.Sand vs Coral/A.MA | <i>Caesio caerulea</i>           | 0.000 | 0.793 | 0.000 | NA    | 0.000 | 0.000 | 139 | 0.309672 | 1     |
| A.MG/A.Sand vs Coral/A.MA | <i>Caesio sp.</i>                | 0.001 | 0.793 | 0.003 | 0.179 | 0.000 | 0.001 | 70  | 0.320267 | 0.252 |
| A.MG/A.Sand vs Coral/A.MA | <i>Caesio teres</i>              | 0.000 | 0.793 | 0.000 | NA    | 0.000 | 0.000 | 171 | 0.330445 | 1     |
| A.MG/A.Sand vs Coral/A.MA | <i>Pterocaesio pisang</i>        | 0.002 | 0.793 | 0.006 | 0.304 | 0.003 | 0.000 | 134 | 0.340598 | 0.363 |
| A.MG/A.Sand vs Coral/A.MA | <i>Pterocaesio tile</i>          | 0.000 | 0.793 | 0.001 | 0.179 | 0.000 | 0.001 | 217 | 0.350728 | 0.903 |
| A.MG/A.Sand vs Coral/A.MA | <i>Caranx melampygus</i>         | 0.001 | 0.793 | 0.004 | 0.179 | 0.000 | 0.001 | 91  | 0.360779 | 0.377 |
| A.MG/A.Sand vs Coral/A.MA | <i>Caranx sp.</i>                | 0.001 | 0.793 | 0.003 | 0.179 | 0.000 | 0.001 | 98  | 0.370562 | 0.484 |
| A.MG/A.Sand vs Coral/A.MA | <i>Elagatis bipinnulata</i>      | 0.001 | 0.793 | 0.003 | 0.179 | 0.000 | 0.001 | 172 | 0.38034  | 0.251 |
| A.MG/A.Sand vs Coral/A.MA | <i>Chaetodon adiergastos</i>     | 0.000 | 0.793 | 0.002 | 0.179 | 0.000 | 0.001 | 203 | 0.390096 | 0.639 |

| A.MG/A.Sand vs Coral/A.MA      | <i>Chaetodon auriga</i>            | 0.001   | 0.793   | 0.004 | 0.256 | 0.000 | 0.002 | 104 | 0.399643 | 0.176 |
|--------------------------------|------------------------------------|---------|---------|-------|-------|-------|-------|-----|----------|-------|
| A.MG/A.Sand vs Coral/A.MA      | <i>Chaetodon baronessa</i>         | 0.010   | 0.793   | 0.006 | 1.553 | 0.002 | 0.019 | 118 | 0.409108 | 0.056 |
| A.MG/A.Sand vs Coral/A.MA      | <i>Chaetodon kleinii</i>           | 0.011   | 0.793   | 0.008 | 1.421 | 0.018 | 0.019 | 232 | 0.418558 | 0.002 |
| A.MG/A.Sand vs Coral/A.MA      | <i>Chaetodon lineolatus</i>        | 0.001   | 0.793   | 0.004 | 0.179 | 0.000 | 0.001 | 129 | 0.427999 | 0.476 |
| A.MG/A.Sand vs Coral/A.MA      | <i>Chaetodon lunula</i>            | 0.002   | 0.793   | 0.004 | 0.377 | 0.000 | 0.003 | 100 | 0.437251 | 0.83  |
| A.MG/A.Sand vs Coral/A.MA      | <i>Chaetodon lunulatus</i>         | 0.011   | 0.793   | 0.006 | 1.847 | 0.003 | 0.022 | 77  | 0.446472 | 0.001 |
| A.MG/A.Sand vs Coral/A.MA      | <i>Chaetodon melannotus</i>        | 0.002   | 0.793   | 0.005 | 0.365 | 0.000 | 0.004 | 59  | 0.455661 | 0.088 |
| A.MG/A.Sand vs Coral/A.MA      | <i>Chaetodon mertensii</i>         | 0.000   | 0.793   | 0.000 | NA    | 0.000 | 0.000 | 188 | 0.464847 | 1     |
| A.MG/A.Sand vs Coral/A.MA      | <i>Chaetodon ocellicaudus</i>      | 0.001   | 0.793   | 0.005 | 0.213 | 0.002 | 0.000 | 79  | 0.473813 | 0.693 |
| A.MG/A.Sand vs Coral/A.MA      | <i>Chaetodon octofasciatus</i>     | 0.000   | 0.793   | 0.000 | NA    | 0.000 | 0.000 | 112 | 0.482591 | 1     |
| A.MG/A.Sand vs Coral/A.MA      | <i>Chaetodon ornatissimus</i>      | 0.002   | 0.793   | 0.006 | 0.382 | 0.002 | 0.003 | 97  | 0.491191 | 0.661 |
| A.MG/A.Sand vs Coral/A.MA      | <i>Chaetodon pelewensis</i>        | 0.004   | 0.793   | 0.006 | 0.568 | 0.000 | 0.007 | 18  | 0.499786 | 0.007 |
| A.MG/A.Sand vs Coral/A.MA      | <i>Chaetodon punctatofasciatus</i> | 0.001   | 0.793   | 0.004 | 0.316 | 0.000 | 0.003 | 15  | 0.508001 | 0.815 |
| A.MG/A.Sand vs Coral/A.MA      | <i>Chaetodon rafflesii</i>         | 0.003   | 0.793   | 0.006 | 0.526 | 0.000 | 0.007 | 190 | 0.516188 | 0.092 |
| A.MG/A.Sand vs Coral/A.MA      | <i>Chaetodon sp.</i>               | 0.002   | 0.793   | 0.008 | 0.265 | 0.003 | 0.001 | 152 | 0.524207 | 0.063 |
| A.MG/A.Sand vs Coral/A.MA      | <i>Chaetodon ulietensis</i>        | 0.000   | 0.793   | 0.000 | NA    | 0.000 | 0.000 | 224 | 0.532011 | 1     |
| A.MG/A.Sand vs Coral/A.MA      | <i>Chaetodon unimaculatus</i>      | 0.000   | 0.793   | 0.000 | NA    | 0.000 | 0.000 | 94  | 0.539814 | 1     |
| A.MG/A.Sand vs Coral/A.MA      | <i>Chaetodon vagabundus</i>        | 0.003   | 0.793   | 0.006 | 0.462 | 0.005 | 0.002 | 4   | 0.547563 | 0.803 |
| A.MG/A.Sand vs Coral/A.MA      | <i>Chelmon sp.</i>                 | 0.001   | 0.793   | 0.003 | 0.179 | 0.000 | 0.001 | 93  | 0.554995 | 0.259 |
| Comparison                     | species                            | average | overall | sd    | ratio | ava   | avb   | ord | cusum    | p     |
| A.MG/A.Sand vs A.SG/Soft Coral | <i>Acanthurus nigricans</i>        | 0.002   | 0.734   | 0.007 | 0.301 | 0.004 | 0.000 | 65  | 0.019969 | 0.119 |
| A.MG/A.Sand vs A.SG/Soft Coral | <i>Acanthurus nigricauda</i>       | 0.000   | 0.734   | 0.000 | NA    | 0.000 | 0.000 | 115 | 0.036773 | 1     |
| A.MG/A.Sand vs A.SG/Soft Coral | <i>Acanthurus nigrofuscus</i>      | 0.005   | 0.734   | 0.010 | 0.512 | 0.010 | 0.000 | 209 | 0.053282 | 0.012 |
| A.MG/A.Sand vs A.SG/Soft Coral | <i>Acanthurus pyroferus</i>        | 0.007   | 0.734   | 0.009 | 0.752 | 0.009 | 0.008 | 164 | 0.068932 | 0.099 |
| A.MG/A.Sand vs A.SG/Soft Coral | <i>Acanthurus sp.</i>              | 0.001   | 0.734   | 0.004 | 0.192 | 0.000 | 0.001 | 196 | 0.08458  | 0.257 |
| A.MG/A.Sand vs A.SG/Soft Coral | <i>Acanthurus thompsoni</i>        | 0.000   | 0.734   | 0.000 | NA    | 0.000 | 0.000 | 11  | 0.100176 | 1     |
| A.MG/A.Sand vs A.SG/Soft Coral | <i>Acanthurus triostegus</i>       | 0.000   | 0.734   | 0.000 | NA    | 0.000 | 0.000 | 211 | 0.115653 | 1     |
| A.MG/A.Sand vs A.SG/Soft Coral | <i>Ctenochaetus binotatus</i>      | 0.009   | 0.734   | 0.010 | 0.948 | 0.017 | 0.007 | 162 | 0.130589 | 0.786 |
| A.MG/A.Sand vs A.SG/Soft Coral | <i>Ctenochaetus cyanocheilus</i>   | 0.000   | 0.734   | 0.000 | NA    | 0.000 | 0.000 | 73  | 0.145482 | 1     |
| A.MG/A.Sand vs A.SG/Soft Coral | <i>Ctenochaetus sp.</i>            | 0.001   | 0.734   | 0.005 | 0.308 | 0.003 | 0.000 | 205 | 0.160135 | 0.485 |
| A.MG/A.Sand vs A.SG/Soft Coral | <i>Ctenochaetus striatus</i>       | 0.011   | 0.734   | 0.010 | 1.205 | 0.024 | 0.016 | 33  | 0.174593 | 0.001 |

|                                |                                 |       |       |       |       |       |       |     |          |       |
|--------------------------------|---------------------------------|-------|-------|-------|-------|-------|-------|-----|----------|-------|
| A.MG/A.Sand vs A.SG/Soft Coral | <i>Ctenochaetus tominiensis</i> | 0.002 | 0.734 | 0.005 | 0.339 | 0.000 | 0.003 | 78  | 0.188891 | 0.997 |
| A.MG/A.Sand vs A.SG/Soft Coral | <i>Naso brevirostris</i>        | 0.001 | 0.734 | 0.004 | 0.192 | 0.000 | 0.002 | 159 | 0.202876 | 0.944 |
| A.MG/A.Sand vs A.SG/Soft Coral | <i>Naso hexacanthus</i>         | 0.003 | 0.734 | 0.008 | 0.392 | 0.005 | 0.001 | 91  | 0.21682  | 0.613 |
| A.MG/A.Sand vs A.SG/Soft Coral | <i>Naso lituratus</i>           | 0.002 | 0.734 | 0.005 | 0.386 | 0.004 | 0.000 | 137 | 0.230671 | 1     |
| A.MG/A.Sand vs A.SG/Soft Coral | <i>Naso minor</i>               | 0.002 | 0.734 | 0.004 | 0.390 | 0.000 | 0.003 | 122 | 0.244366 | 0.904 |
| A.MG/A.Sand vs A.SG/Soft Coral | <i>Naso sp.</i>                 | 0.000 | 0.734 | 0.000 | NA    | 0.000 | 0.000 | 34  | 0.258031 | 1     |
| A.MG/A.Sand vs A.SG/Soft Coral | <i>Naso unicornis</i>           | 0.003 | 0.734 | 0.007 | 0.453 | 0.001 | 0.005 | 178 | 0.271635 | 0.989 |
| A.MG/A.Sand vs A.SG/Soft Coral | <i>Naso vlamingii</i>           | 0.000 | 0.734 | 0.000 | NA    | 0.000 | 0.000 | 206 | 0.284854 | 1     |
| A.MG/A.Sand vs A.SG/Soft Coral | <i>Zebрасoma scopas</i>         | 0.004 | 0.734 | 0.007 | 0.542 | 0.001 | 0.007 | 84  | 0.298006 | 1     |
| A.MG/A.Sand vs A.SG/Soft Coral | <i>Zebрасoma veliferum</i>      | 0.000 | 0.734 | 0.000 | NA    | 0.000 | 0.000 | 132 | 0.311145 | 1     |
| A.MG/A.Sand vs A.SG/Soft Coral | <i>Balistoides viridescens</i>  | 0.000 | 0.734 | 0.000 | NA    | 0.000 | 0.000 | 130 | 0.3242   | 1     |
| A.MG/A.Sand vs A.SG/Soft Coral | <i>Caesio caeruleaurea</i>      | 0.000 | 0.734 | 0.000 | NA    | 0.000 | 0.000 | 134 | 0.337055 | 1     |
| A.MG/A.Sand vs A.SG/Soft Coral | <i>Caesio sp.</i>               | 0.000 | 0.734 | 0.000 | NA    | 0.000 | 0.000 | 97  | 0.349883 | 1     |
| A.MG/A.Sand vs A.SG/Soft Coral | <i>Caesio teres</i>             | 0.000 | 0.734 | 0.000 | NA    | 0.000 | 0.000 | 83  | 0.362555 | 1     |
| A.MG/A.Sand vs A.SG/Soft Coral | <i>Pterocaesio pisang</i>       | 0.002 | 0.734 | 0.007 | 0.360 | 0.003 | 0.002 | 8   | 0.37501  | 0.103 |
| A.MG/A.Sand vs A.SG/Soft Coral | <i>Pterocaesio tile</i>         | 0.000 | 0.734 | 0.000 | NA    | 0.000 | 0.000 | 74  | 0.387081 | 1     |
| A.MG/A.Sand vs A.SG/Soft Coral | <i>Caranx melampygus</i>        | 0.000 | 0.734 | 0.000 | NA    | 0.000 | 0.000 | 70  | 0.399121 | 1     |
| A.MG/A.Sand vs A.SG/Soft Coral | <i>Caranx sp.</i>               | 0.000 | 0.734 | 0.000 | NA    | 0.000 | 0.000 | 208 | 0.411042 | 1     |
| A.MG/A.Sand vs A.SG/Soft Coral | <i>Elagatis bipinnulata</i>     | 0.000 | 0.734 | 0.000 | NA    | 0.000 | 0.000 | 232 | 0.422688 | 1     |
| A.MG/A.Sand vs A.SG/Soft Coral | <i>Chaetodon adiergastos</i>    | 0.000 | 0.734 | 0.000 | NA    | 0.000 | 0.000 | 76  | 0.433967 | 1     |
| A.MG/A.Sand vs A.SG/Soft Coral | <i>Chaetodon auriga</i>         | 0.000 | 0.734 | 0.000 | NA    | 0.000 | 0.000 | 171 | 0.444941 | 1     |
| A.MG/A.Sand vs A.SG/Soft Coral | <i>Chaetodon baronessa</i>      | 0.011 | 0.734 | 0.010 | 1.112 | 0.002 | 0.021 | 181 | 0.455806 | 0.008 |
| A.MG/A.Sand vs A.SG/Soft Coral | <i>Chaetodon kleinii</i>        | 0.010 | 0.734 | 0.011 | 0.934 | 0.018 | 0.008 | 140 | 0.466622 | 0.175 |
| A.MG/A.Sand vs A.SG/Soft Coral | <i>Chaetodon lineolatus</i>     | 0.001 | 0.734 | 0.003 | 0.192 | 0.000 | 0.001 | 193 | 0.477299 | 0.607 |
| A.MG/A.Sand vs A.SG/Soft Coral | <i>Chaetodon lunula</i>         | 0.002 | 0.734 | 0.007 | 0.340 | 0.000 | 0.005 | 133 | 0.487791 | 0.517 |
| A.MG/A.Sand vs A.SG/Soft Coral | <i>Chaetodon lunulatus</i>      | 0.004 | 0.734 | 0.007 | 0.550 | 0.003 | 0.005 | 77  | 0.498226 | 1     |
| A.MG/A.Sand vs A.SG/Soft Coral | <i>Chaetodon melannotus</i>     | 0.000 | 0.734 | 0.000 | NA    | 0.000 | 0.000 | 79  | 0.508658 | 1     |
| A.MG/A.Sand vs A.SG/Soft Coral | <i>Chaetodon mertensii</i>      | 0.001 | 0.734 | 0.005 | 0.277 | 0.000 | 0.003 | 202 | 0.518621 | 0.156 |
| A.MG/A.Sand vs A.SG/Soft Coral | <i>Chaetodon ocellicaudus</i>   | 0.001 | 0.734 | 0.005 | 0.213 | 0.002 | 0.000 | 59  | 0.52853  | 0.694 |
| A.MG/A.Sand vs A.SG/Soft Coral | <i>Chaetodon octofasciatus</i>  | 0.001 | 0.734 | 0.005 | 0.192 | 0.000 | 0.002 | 197 | 0.538421 | 0.268 |
| A.MG/A.Sand vs A.SG/Soft Coral | <i>Chaetodon ornatissimus</i>   | 0.001 | 0.734 | 0.005 | 0.287 | 0.002 | 0.001 | 172 | 0.548261 | 0.862 |

| A.MG/A.Sand vs A.SG/Soft Coral | <i>Chaetodon pelewensis</i>        | 0.000   | 0.734   | 0.000 | NA    | 0.000 | 0.000 | 4   | 0.557882 | 1     |
|--------------------------------|------------------------------------|---------|---------|-------|-------|-------|-------|-----|----------|-------|
| A.MG/A.Sand vs A.SG/Soft Coral | <i>Chaetodon punctatofasciatus</i> | 0.001   | 0.734   | 0.006 | 0.192 | 0.000 | 0.002 | 195 | 0.567355 | 0.854 |
| A.MG/A.Sand vs A.SG/Soft Coral | <i>Chaetodon rafflesii</i>         | 0.001   | 0.734   | 0.003 | 0.192 | 0.000 | 0.001 | 188 | 0.576403 | 0.985 |
| A.MG/A.Sand vs A.SG/Soft Coral | <i>Chaetodon sp.</i>               | 0.002   | 0.734   | 0.007 | 0.213 | 0.003 | 0.000 | 217 | 0.585117 | 0.312 |
| A.MG/A.Sand vs A.SG/Soft Coral | <i>Chaetodon ulietensis</i>        | 0.000   | 0.734   | 0.000 | NA    | 0.000 | 0.000 | 128 | 0.593793 | 1     |
| A.MG/A.Sand vs A.SG/Soft Coral | <i>Chaetodon unimaculatus</i>      | 0.000   | 0.734   | 0.000 | NA    | 0.000 | 0.000 | 104 | 0.602457 | 1     |
| A.MG/A.Sand vs A.SG/Soft Coral | <i>Chaetodon vagabundus</i>        | 0.005   | 0.734   | 0.008 | 0.550 | 0.005 | 0.006 | 136 | 0.61096  | 0.221 |
| A.MG/A.Sand vs A.SG/Soft Coral | <i>Chelmon sp.</i>                 | 0.000   | 0.734   | 0.000 | NA    | 0.000 | 0.000 | 105 | 0.619073 | 1     |
| Comparison                     | species                            | average | overall | sd    | ratio | ava   | avb   | ord | cusum    | p     |
| A.MG/A.Sand vs A.CR/A.RF       | <i>Acanthurus nigricans</i>        | 0.002   | 0.747   | 0.007 | 0.300 | 0.004 | 0.000 | 65  | 0.019641 | 0.195 |
| A.MG/A.Sand vs A.CR/A.RF       | <i>Acanthurus nigricauda</i>       | 0.000   | 0.747   | 0.000 | NA    | 0.000 | 0.000 | 209 | 0.038371 | 1     |
| A.MG/A.Sand vs A.CR/A.RF       | <i>Acanthurus nigrofuscus</i>      | 0.005   | 0.747   | 0.010 | 0.511 | 0.010 | 0.000 | 206 | 0.055686 | 0.076 |
| A.MG/A.Sand vs A.CR/A.RF       | <i>Acanthurus pyroferus</i>        | 0.006   | 0.747   | 0.009 | 0.665 | 0.009 | 0.005 | 115 | 0.072209 | 0.418 |
| A.MG/A.Sand vs A.CR/A.RF       | <i>Acanthurus sp.</i>              | 0.000   | 0.747   | 0.000 | NA    | 0.000 | 0.000 | 164 | 0.087412 | 1     |
| A.MG/A.Sand vs A.CR/A.RF       | <i>Acanthurus thompsoni</i>        | 0.002   | 0.747   | 0.006 | 0.301 | 0.000 | 0.003 | 172 | 0.102348 | 0.15  |
| A.MG/A.Sand vs A.CR/A.RF       | <i>Acanthurus triostegus</i>       | 0.000   | 0.747   | 0.000 | NA    | 0.000 | 0.000 | 34  | 0.117219 | 1     |
| A.MG/A.Sand vs A.CR/A.RF       | <i>Ctenochaetus binotatus</i>      | 0.010   | 0.747   | 0.008 | 1.204 | 0.017 | 0.016 | 73  | 0.131898 | 0.499 |
| A.MG/A.Sand vs A.CR/A.RF       | <i>Ctenochaetus cyanocheilus</i>   | 0.000   | 0.747   | 0.000 | NA    | 0.000 | 0.000 | 162 | 0.146554 | 1     |
| A.MG/A.Sand vs A.CR/A.RF       | <i>Ctenochaetus sp.</i>            | 0.001   | 0.747   | 0.005 | 0.308 | 0.003 | 0.000 | 11  | 0.16112  | 0.458 |
| A.MG/A.Sand vs A.CR/A.RF       | <i>Ctenochaetus striatus</i>       | 0.011   | 0.747   | 0.008 | 1.385 | 0.024 | 0.022 | 217 | 0.175351 | 0.041 |
| A.MG/A.Sand vs A.CR/A.RF       | <i>Ctenochaetus tominiensis</i>    | 0.002   | 0.747   | 0.006 | 0.445 | 0.000 | 0.005 | 122 | 0.189481 | 0.885 |
| A.MG/A.Sand vs A.CR/A.RF       | <i>Naso brevirostris</i>           | 0.001   | 0.747   | 0.003 | 0.301 | 0.000 | 0.002 | 83  | 0.203214 | 0.852 |
| A.MG/A.Sand vs A.CR/A.RF       | <i>Naso hexacanthus</i>            | 0.005   | 0.747   | 0.009 | 0.549 | 0.005 | 0.005 | 211 | 0.216688 | 0.159 |
| A.MG/A.Sand vs A.CR/A.RF       | <i>Naso lituratus</i>              | 0.006   | 0.747   | 0.008 | 0.784 | 0.004 | 0.010 | 178 | 0.230081 | 0.188 |
| A.MG/A.Sand vs A.CR/A.RF       | <i>Naso minor</i>                  | 0.001   | 0.747   | 0.003 | 0.434 | 0.000 | 0.003 | 8   | 0.24313  | 0.925 |
| A.MG/A.Sand vs A.CR/A.RF       | <i>Naso sp.</i>                    | 0.000   | 0.747   | 0.000 | NA    | 0.000 | 0.000 | 159 | 0.255944 | 1     |
| A.MG/A.Sand vs A.CR/A.RF       | <i>Naso unicornis</i>              | 0.003   | 0.747   | 0.007 | 0.493 | 0.001 | 0.006 | 84  | 0.268489 | 0.941 |
| A.MG/A.Sand vs A.CR/A.RF       | <i>Naso vlamingii</i>              | 0.003   | 0.747   | 0.006 | 0.446 | 0.000 | 0.005 | 130 | 0.281014 | 0.063 |
| A.MG/A.Sand vs A.CR/A.RF       | <i>Zebrasoma scopas</i>            | 0.008   | 0.747   | 0.007 | 1.133 | 0.001 | 0.017 | 128 | 0.293314 | 0.113 |
| A.MG/A.Sand vs A.CR/A.RF       | <i>Zebrasoma veliferum</i>         | 0.000   | 0.747   | 0.000 | NA    | 0.000 | 0.000 | 232 | 0.305156 | 1     |
| A.MG/A.Sand vs A.CR/A.RF       | <i>Balistoides viridescens</i>     | 0.000   | 0.747   | 0.000 | NA    | 0.000 | 0.000 | 70  | 0.316747 | 1     |

|                          |                                    |         |         |       |       |       |       |     |          |       |
|--------------------------|------------------------------------|---------|---------|-------|-------|-------|-------|-----|----------|-------|
| A.MG/A.Sand vs A.CR/A.RF | <i>Caesio caeruleaurea</i>         | 0.002   | 0.747   | 0.006 | 0.301 | 0.000 | 0.004 | 151 | 0.328032 | 0.017 |
| A.MG/A.Sand vs A.CR/A.RF | <i>Caesio sp.</i>                  | 0.000   | 0.747   | 0.000 | NA    | 0.000 | 0.000 | 188 | 0.339313 | 1     |
| A.MG/A.Sand vs A.CR/A.RF | <i>Caesio teres</i>                | 0.001   | 0.747   | 0.005 | 0.301 | 0.000 | 0.003 | 195 | 0.350452 | 0.02  |
| A.MG/A.Sand vs A.CR/A.RF | <i>Pterocaesio pisang</i>          | 0.003   | 0.747   | 0.007 | 0.429 | 0.003 | 0.003 | 20  | 0.361522 | 0.089 |
| A.MG/A.Sand vs A.CR/A.RF | <i>Pterocaesio tile</i>            | 0.002   | 0.747   | 0.005 | 0.430 | 0.000 | 0.005 | 140 | 0.372381 | 0.029 |
| A.MG/A.Sand vs A.CR/A.RF | <i>Caranx melampygus</i>           | 0.001   | 0.747   | 0.004 | 0.301 | 0.000 | 0.002 | 77  | 0.383232 | 0.187 |
| A.MG/A.Sand vs A.CR/A.RF | <i>Caranx sp.</i>                  | 0.001   | 0.747   | 0.004 | 0.301 | 0.000 | 0.003 | 171 | 0.394011 | 0.209 |
| A.MG/A.Sand vs A.CR/A.RF | <i>Elagatis bipinnulata</i>        | 0.000   | 0.747   | 0.000 | NA    | 0.000 | 0.000 | 208 | 0.404726 | 1     |
| A.MG/A.Sand vs A.CR/A.RF | <i>Chaetodon adiergastos</i>       | 0.001   | 0.747   | 0.005 | 0.301 | 0.000 | 0.003 | 91  | 0.415371 | 0.071 |
| A.MG/A.Sand vs A.CR/A.RF | <i>Chaetodon auriga</i>            | 0.000   | 0.747   | 0.000 | NA    | 0.000 | 0.000 | 134 | 0.425941 | 1     |
| A.MG/A.Sand vs A.CR/A.RF | <i>Chaetodon baronessa</i>         | 0.008   | 0.747   | 0.008 | 0.980 | 0.002 | 0.014 | 37  | 0.43644  | 0.933 |
| A.MG/A.Sand vs A.CR/A.RF | <i>Chaetodon kleinii</i>           | 0.011   | 0.747   | 0.009 | 1.214 | 0.018 | 0.017 | 33  | 0.44664  | 0.046 |
| A.MG/A.Sand vs A.CR/A.RF | <i>Chaetodon lineolatus</i>        | 0.000   | 0.747   | 0.000 | NA    | 0.000 | 0.000 | 79  | 0.456781 | 1     |
| A.MG/A.Sand vs A.CR/A.RF | <i>Chaetodon lunula</i>            | 0.000   | 0.747   | 0.000 | NA    | 0.000 | 0.000 | 59  | 0.466513 | 1     |
| A.MG/A.Sand vs A.CR/A.RF | <i>Chaetodon lunulatus</i>         | 0.008   | 0.747   | 0.008 | 0.988 | 0.003 | 0.015 | 224 | 0.475637 | 0.525 |
| A.MG/A.Sand vs A.CR/A.RF | <i>Chaetodon melannotus</i>        | 0.000   | 0.747   | 0.000 | NA    | 0.000 | 0.000 | 97  | 0.484745 | 1     |
| A.MG/A.Sand vs A.CR/A.RF | <i>Chaetodon mertensii</i>         | 0.000   | 0.747   | 0.000 | NA    | 0.000 | 0.000 | 104 | 0.493277 | 1     |
| A.MG/A.Sand vs A.CR/A.RF | <i>Chaetodon ocellicaudus</i>      | 0.003   | 0.747   | 0.007 | 0.487 | 0.002 | 0.005 | 89  | 0.501705 | 0.037 |
| A.MG/A.Sand vs A.CR/A.RF | <i>Chaetodon octofasciatus</i>     | 0.000   | 0.747   | 0.000 | NA    | 0.000 | 0.000 | 126 | 0.510055 | 1     |
| A.MG/A.Sand vs A.CR/A.RF | <i>Chaetodon ornatissimus</i>      | 0.006   | 0.747   | 0.009 | 0.608 | 0.002 | 0.010 | 92  | 0.51832  | 0.014 |
| A.MG/A.Sand vs A.CR/A.RF | <i>Chaetodon pelewensis</i>        | 0.000   | 0.747   | 0.000 | NA    | 0.000 | 0.000 | 93  | 0.526577 | 1     |
| A.MG/A.Sand vs A.CR/A.RF | <i>Chaetodon punctatofasciatus</i> | 0.003   | 0.747   | 0.006 | 0.439 | 0.000 | 0.005 | 190 | 0.534818 | 0.339 |
| A.MG/A.Sand vs A.CR/A.RF | <i>Chaetodon rafflesii</i>         | 0.001   | 0.747   | 0.004 | 0.301 | 0.000 | 0.002 | 203 | 0.542988 | 0.896 |
| A.MG/A.Sand vs A.CR/A.RF | <i>Chaetodon sp.</i>               | 0.002   | 0.747   | 0.007 | 0.213 | 0.003 | 0.000 | 4   | 0.551122 | 0.291 |
| A.MG/A.Sand vs A.CR/A.RF | <i>Chaetodon ulietensis</i>        | 0.002   | 0.747   | 0.006 | 0.301 | 0.000 | 0.004 | 160 | 0.559199 | 0.015 |
| A.MG/A.Sand vs A.CR/A.RF | <i>Chaetodon unimaculatus</i>      | 0.003   | 0.747   | 0.007 | 0.446 | 0.000 | 0.006 | 136 | 0.567263 | 0.005 |
| A.MG/A.Sand vs A.CR/A.RF | <i>Chaetodon vagabundus</i>        | 0.005   | 0.747   | 0.007 | 0.685 | 0.005 | 0.006 | 15  | 0.575152 | 0.267 |
| A.MG/A.Sand vs A.CR/A.RF | <i>Chelmon sp.</i>                 | 0.000   | 0.747   | 0.000 | NA    | 0.000 | 0.000 | 68  | 0.582964 | 1     |
| Comparison               | species                            | average | overall | sd    | ratio | ava   | avb   | ord | cusum    | p     |
| Rub/EAM vs Coral/A.MA    | <i>Acanthurus nigricans</i>        | 0.000   | 0.724   | 0.002 | 0.179 | 0.000 | 0.001 | 8   | 0.019492 | 0.707 |
| Rub/EAM vs Coral/A.MA    | <i>Acanthurus nigricauda</i>       | 0.001   | 0.724   | 0.003 | 0.179 | 0.000 | 0.001 | 133 | 0.037097 | 0.144 |

|                       |                                  |       |       |       |       |       |       |     |          |       |
|-----------------------|----------------------------------|-------|-------|-------|-------|-------|-------|-----|----------|-------|
| Rub/EAM vs Coral/A.MA | <i>Acanthurus nigrofuscus</i>    | 0.003 | 0.724 | 0.008 | 0.424 | 0.006 | 0.000 | 130 | 0.05312  | 0.339 |
| Rub/EAM vs Coral/A.MA | <i>Acanthurus pyroferus</i>      | 0.005 | 0.724 | 0.007 | 0.635 | 0.005 | 0.005 | 37  | 0.068709 | 0.833 |
| Rub/EAM vs Coral/A.MA | <i>Acanthurus sp.</i>            | 0.000 | 0.724 | 0.000 | NA    | 0.000 | 0.000 | 162 | 0.084112 | 1     |
| Rub/EAM vs Coral/A.MA | <i>Acanthurus thompsoni</i>      | 0.001 | 0.724 | 0.004 | 0.257 | 0.000 | 0.002 | 164 | 0.099455 | 0.47  |
| Rub/EAM vs Coral/A.MA | <i>Acanthurus triostegus</i>     | 0.000 | 0.724 | 0.003 | 0.179 | 0.000 | 0.001 | 178 | 0.114698 | 0.134 |
| Rub/EAM vs Coral/A.MA | <i>Ctenochaetus binotatus</i>    | 0.014 | 0.724 | 0.010 | 1.375 | 0.035 | 0.013 | 206 | 0.129246 | 0.001 |
| Rub/EAM vs Coral/A.MA | <i>Ctenochaetus cyanocheilus</i> | 0.001 | 0.724 | 0.003 | 0.179 | 0.000 | 0.001 | 33  | 0.143434 | 0.149 |
| Rub/EAM vs Coral/A.MA | <i>Ctenochaetus sp.</i>          | 0.001 | 0.724 | 0.005 | 0.305 | 0.000 | 0.003 | 131 | 0.157543 | 0.451 |
| Rub/EAM vs Coral/A.MA | <i>Ctenochaetus striatus</i>     | 0.009 | 0.724 | 0.005 | 1.612 | 0.023 | 0.026 | 34  | 0.171039 | 0.685 |
| Rub/EAM vs Coral/A.MA | <i>Ctenochaetus tominiensis</i>  | 0.006 | 0.724 | 0.007 | 0.827 | 0.006 | 0.008 | 123 | 0.184434 | 0.039 |
| Rub/EAM vs Coral/A.MA | <i>Naso brevirostris</i>         | 0.002 | 0.724 | 0.005 | 0.467 | 0.000 | 0.005 | 139 | 0.197484 | 0.298 |
| Rub/EAM vs Coral/A.MA | <i>Naso hexacanthus</i>          | 0.003 | 0.724 | 0.005 | 0.566 | 0.000 | 0.006 | 77  | 0.210423 | 0.619 |
| Rub/EAM vs Coral/A.MA | <i>Naso lituratus</i>            | 0.006 | 0.724 | 0.007 | 0.893 | 0.002 | 0.012 | 122 | 0.223217 | 0.064 |
| Rub/EAM vs Coral/A.MA | <i>Naso minor</i>                | 0.004 | 0.724 | 0.006 | 0.765 | 0.007 | 0.003 | 211 | 0.235886 | 0.034 |
| Rub/EAM vs Coral/A.MA | <i>Naso sp.</i>                  | 0.001 | 0.724 | 0.004 | 0.302 | 0.000 | 0.003 | 195 | 0.248553 | 0.182 |
| Rub/EAM vs Coral/A.MA | <i>Naso unicornis</i>            | 0.007 | 0.724 | 0.007 | 0.963 | 0.003 | 0.013 | 205 | 0.261076 | 0.082 |
| Rub/EAM vs Coral/A.MA | <i>Naso vlamingii</i>            | 0.002 | 0.724 | 0.005 | 0.339 | 0.002 | 0.001 | 20  | 0.273554 | 0.182 |
| Rub/EAM vs Coral/A.MA | <i>Zebrasoma scopas</i>          | 0.009 | 0.724 | 0.006 | 1.438 | 0.010 | 0.020 | 11  | 0.285778 | 0.009 |
| Rub/EAM vs Coral/A.MA | <i>Zebrasoma veliferum</i>       | 0.001 | 0.724 | 0.003 | 0.179 | 0.000 | 0.001 | 104 | 0.297745 | 0.134 |
| Rub/EAM vs Coral/A.MA | <i>Balistoides viridescens</i>   | 0.000 | 0.724 | 0.003 | 0.179 | 0.000 | 0.001 | 68  | 0.309638 | 0.123 |
| Rub/EAM vs Coral/A.MA | <i>Caesio caerulea</i>           | 0.000 | 0.724 | 0.000 | NA    | 0.000 | 0.000 | 115 | 0.321484 | 1     |
| Rub/EAM vs Coral/A.MA | <i>Caesio sp.</i>                | 0.001 | 0.724 | 0.003 | 0.179 | 0.000 | 0.001 | 134 | 0.33311  | 0.134 |
| Rub/EAM vs Coral/A.MA | <i>Caesio teres</i>              | 0.000 | 0.724 | 0.000 | NA    | 0.000 | 0.000 | 78  | 0.344634 | 1     |
| Rub/EAM vs Coral/A.MA | <i>Pterocaesio pisang</i>        | 0.000 | 0.724 | 0.000 | NA    | 0.000 | 0.000 | 100 | 0.356085 | 1     |
| Rub/EAM vs Coral/A.MA | <i>Pterocaesio tile</i>          | 0.001 | 0.724 | 0.004 | 0.334 | 0.002 | 0.001 | 126 | 0.367382 | 0.272 |
| Rub/EAM vs Coral/A.MA | <i>Caranx melampygus</i>         | 0.001 | 0.724 | 0.004 | 0.179 | 0.000 | 0.001 | 98  | 0.378546 | 0.321 |
| Rub/EAM vs Coral/A.MA | <i>Caranx sp.</i>                | 0.001 | 0.724 | 0.003 | 0.179 | 0.000 | 0.001 | 118 | 0.389595 | 0.318 |
| Rub/EAM vs Coral/A.MA | <i>Elagatis bipinnulata</i>      | 0.001 | 0.724 | 0.003 | 0.179 | 0.000 | 0.001 | 111 | 0.40034  | 0.128 |
| Rub/EAM vs Coral/A.MA | <i>Chaetodon adiergastos</i>     | 0.000 | 0.724 | 0.002 | 0.179 | 0.000 | 0.001 | 140 | 0.411057 | 0.494 |
| Rub/EAM vs Coral/A.MA | <i>Chaetodon auriga</i>          | 0.001 | 0.724 | 0.004 | 0.256 | 0.000 | 0.002 | 203 | 0.421553 | 0.237 |
| Rub/EAM vs Coral/A.MA | <i>Chaetodon baronessa</i>       | 0.010 | 0.724 | 0.007 | 1.461 | 0.013 | 0.019 | 190 | 0.431837 | 0.041 |



| Rub/EAM vs Coral/A.MA      | <i>Chaetodon kleinii</i>           | 0.010   | 0.724   | 0.007 | 1.478 | 0.012 | 0.019 | 208 | 0.442117 | 0.296 |
|----------------------------|------------------------------------|---------|---------|-------|-------|-------|-------|-----|----------|-------|
| Rub/EAM vs Coral/A.MA      | <i>Chaetodon lineolatus</i>        | 0.001   | 0.724   | 0.004 | 0.179 | 0.000 | 0.001 | 172 | 0.45227  | 0.317 |
| Rub/EAM vs Coral/A.MA      | <i>Chaetodon lunula</i>            | 0.003   | 0.724   | 0.006 | 0.474 | 0.003 | 0.003 | 86  | 0.462304 | 0.358 |
| Rub/EAM vs Coral/A.MA      | <i>Chaetodon lunulatus</i>         | 0.011   | 0.724   | 0.006 | 1.825 | 0.014 | 0.022 | 159 | 0.472212 | 0.001 |
| Rub/EAM vs Coral/A.MA      | <i>Chaetodon melannotus</i>        | 0.002   | 0.724   | 0.005 | 0.365 | 0.000 | 0.004 | 18  | 0.481916 | 0.137 |
| Rub/EAM vs Coral/A.MA      | <i>Chaetodon mertensii</i>         | 0.000   | 0.724   | 0.000 | NA    | 0.000 | 0.000 | 112 | 0.491549 | 1     |
| Rub/EAM vs Coral/A.MA      | <i>Chaetodon ocellicaudus</i>      | 0.002   | 0.724   | 0.006 | 0.288 | 0.003 | 0.000 | 193 | 0.501175 | 0.376 |
| Rub/EAM vs Coral/A.MA      | <i>Chaetodon octofasciatus</i>     | 0.000   | 0.724   | 0.000 | NA    | 0.000 | 0.000 | 227 | 0.510265 | 1     |
| Rub/EAM vs Coral/A.MA      | <i>Chaetodon ornatissimus</i>      | 0.001   | 0.724   | 0.004 | 0.320 | 0.000 | 0.003 | 217 | 0.51927  | 0.831 |
| Rub/EAM vs Coral/A.MA      | <i>Chaetodon pelewensis</i>        | 0.004   | 0.724   | 0.006 | 0.568 | 0.000 | 0.007 | 94  | 0.528176 | 0.038 |
| Rub/EAM vs Coral/A.MA      | <i>Chaetodon punctatofasciatus</i> | 0.002   | 0.724   | 0.005 | 0.428 | 0.002 | 0.003 | 129 | 0.537059 | 0.449 |
| Rub/EAM vs Coral/A.MA      | <i>Chaetodon rafflesii</i>         | 0.003   | 0.724   | 0.006 | 0.526 | 0.000 | 0.007 | 84  | 0.545939 | 0.132 |
| Rub/EAM vs Coral/A.MA      | <i>Chaetodon sp.</i>               | 0.001   | 0.724   | 0.003 | 0.179 | 0.000 | 0.001 | 15  | 0.554664 | 0.506 |
| Rub/EAM vs Coral/A.MA      | <i>Chaetodon ulietensis</i>        | 0.000   | 0.724   | 0.000 | NA    | 0.000 | 0.000 | 242 | 0.563191 | 1     |
| Rub/EAM vs Coral/A.MA      | <i>Chaetodon unimaculatus</i>      | 0.000   | 0.724   | 0.000 | NA    | 0.000 | 0.000 | 224 | 0.571599 | 1     |
| Rub/EAM vs Coral/A.MA      | <i>Chaetodon vagabundus</i>        | 0.003   | 0.724   | 0.007 | 0.370 | 0.004 | 0.002 | 120 | 0.579729 | 0.783 |
| Rub/EAM vs Coral/A.MA      | <i>Chelmon sp.</i>                 | 0.001   | 0.724   | 0.003 | 0.179 | 0.000 | 0.001 | 202 | 0.587596 | 0.112 |
| Comparison                 | species                            | average | overall | sd    | ratio | ava   | avb   | ord | cusum    | p     |
| Rub/EAM vs A.SG/Soft Coral | <i>Acanthurus nigricans</i>        | 0.000   | 0.690   | 0.000 | NA    | 0.000 | 0.000 | 8   | 0.022825 | 1     |
| Rub/EAM vs A.SG/Soft Coral | <i>Acanthurus nigricauda</i>       | 0.000   | 0.690   | 0.000 | NA    | 0.000 | 0.000 | 178 | 0.039993 | 1     |
| Rub/EAM vs A.SG/Soft Coral | <i>Acanthurus nigrofuscus</i>      | 0.003   | 0.690   | 0.008 | 0.424 | 0.006 | 0.000 | 162 | 0.056696 | 0.37  |
| Rub/EAM vs A.SG/Soft Coral | <i>Acanthurus pyroferus</i>        | 0.006   | 0.690   | 0.008 | 0.704 | 0.005 | 0.008 | 206 | 0.073177 | 0.535 |
| Rub/EAM vs A.SG/Soft Coral | <i>Acanthurus sp.</i>              | 0.001   | 0.690   | 0.004 | 0.192 | 0.000 | 0.001 | 33  | 0.08933  | 0.146 |
| Rub/EAM vs A.SG/Soft Coral | <i>Acanthurus thompsoni</i>        | 0.000   | 0.690   | 0.000 | NA    | 0.000 | 0.000 | 196 | 0.105408 | 1     |
| Rub/EAM vs A.SG/Soft Coral | <i>Acanthurus triostegus</i>       | 0.000   | 0.690   | 0.000 | NA    | 0.000 | 0.000 | 134 | 0.12121  | 1     |
| Rub/EAM vs A.SG/Soft Coral | <i>Ctenochaetus binotatus</i>      | 0.016   | 0.690   | 0.011 | 1.406 | 0.035 | 0.007 | 211 | 0.136726 | 0.001 |
| Rub/EAM vs A.SG/Soft Coral | <i>Ctenochaetus cyanocheilus</i>   | 0.000   | 0.690   | 0.000 | NA    | 0.000 | 0.000 | 164 | 0.152242 | 1     |
| Rub/EAM vs A.SG/Soft Coral | <i>Ctenochaetus sp.</i>            | 0.000   | 0.690   | 0.000 | NA    | 0.000 | 0.000 | 122 | 0.16769  | 1     |
| Rub/EAM vs A.SG/Soft Coral | <i>Ctenochaetus striatus</i>       | 0.010   | 0.690   | 0.008 | 1.235 | 0.023 | 0.016 | 131 | 0.183018 | 0.126 |
| Rub/EAM vs A.SG/Soft Coral | <i>Ctenochaetus tominiensis</i>    | 0.004   | 0.690   | 0.007 | 0.542 | 0.006 | 0.003 | 133 | 0.198086 | 0.481 |
| Rub/EAM vs A.SG/Soft Coral | <i>Naso brevirostris</i>           | 0.001   | 0.690   | 0.004 | 0.192 | 0.000 | 0.002 | 11  | 0.213034 | 0.88  |

|                            |                                    |       |       |       |       |       |       |     |          |       |
|----------------------------|------------------------------------|-------|-------|-------|-------|-------|-------|-----|----------|-------|
| Rub/EAM vs A.SG/Soft Coral | <i>Naso hexacanthus</i>            | 0.000 | 0.690 | 0.003 | 0.192 | 0.000 | 0.001 | 140 | 0.227365 | 0.998 |
| Rub/EAM vs A.SG/Soft Coral | <i>Naso lituratus</i>              | 0.001 | 0.690 | 0.004 | 0.288 | 0.002 | 0.000 | 115 | 0.241674 | 0.999 |
| Rub/EAM vs A.SG/Soft Coral | <i>Naso minor</i>                  | 0.004 | 0.690 | 0.006 | 0.758 | 0.007 | 0.003 | 132 | 0.255835 | 0.032 |
| Rub/EAM vs A.SG/Soft Coral | <i>Naso sp.</i>                    | 0.000 | 0.690 | 0.000 | NA    | 0.000 | 0.000 | 195 | 0.269928 | 1     |
| Rub/EAM vs A.SG/Soft Coral | <i>Naso unicornis</i>              | 0.004 | 0.690 | 0.008 | 0.494 | 0.003 | 0.005 | 123 | 0.283993 | 0.909 |
| Rub/EAM vs A.SG/Soft Coral | <i>Naso vlamingii</i>              | 0.001 | 0.690 | 0.004 | 0.288 | 0.002 | 0.000 | 78  | 0.297955 | 0.35  |
| Rub/EAM vs A.SG/Soft Coral | <i>Zebrasoma scopas</i>            | 0.006 | 0.690 | 0.008 | 0.817 | 0.010 | 0.007 | 159 | 0.311788 | 0.869 |
| Rub/EAM vs A.SG/Soft Coral | <i>Zebrasoma veliferum</i>         | 0.000 | 0.690 | 0.000 | NA    | 0.000 | 0.000 | 77  | 0.325498 | 1     |
| Rub/EAM vs A.SG/Soft Coral | <i>Balistoides viridescens</i>     | 0.000 | 0.690 | 0.000 | NA    | 0.000 | 0.000 | 205 | 0.339057 | 1     |
| Rub/EAM vs A.SG/Soft Coral | <i>Caesio caeruleaurea</i>         | 0.000 | 0.690 | 0.000 | NA    | 0.000 | 0.000 | 91  | 0.352314 | 1     |
| Rub/EAM vs A.SG/Soft Coral | <i>Caesio sp.</i>                  | 0.000 | 0.690 | 0.000 | NA    | 0.000 | 0.000 | 208 | 0.365461 | 1     |
| Rub/EAM vs A.SG/Soft Coral | <i>Caesio teres</i>                | 0.000 | 0.690 | 0.000 | NA    | 0.000 | 0.000 | 130 | 0.378417 | 1     |
| Rub/EAM vs A.SG/Soft Coral | <i>Pterocaesio pisang</i>          | 0.001 | 0.690 | 0.004 | 0.192 | 0.000 | 0.002 | 193 | 0.391187 | 0.622 |
| Rub/EAM vs A.SG/Soft Coral | <i>Pterocaesio tile</i>            | 0.001 | 0.690 | 0.004 | 0.288 | 0.002 | 0.000 | 137 | 0.403783 | 0.379 |
| Rub/EAM vs A.SG/Soft Coral | <i>Caranx melampygus</i>           | 0.000 | 0.690 | 0.000 | NA    | 0.000 | 0.000 | 181 | 0.416284 | 1     |
| Rub/EAM vs A.SG/Soft Coral | <i>Caranx sp.</i>                  | 0.000 | 0.690 | 0.000 | NA    | 0.000 | 0.000 | 202 | 0.428706 | 1     |
| Rub/EAM vs A.SG/Soft Coral | <i>Elagatis bipinnulata</i>        | 0.000 | 0.690 | 0.000 | NA    | 0.000 | 0.000 | 126 | 0.44093  | 1     |
| Rub/EAM vs A.SG/Soft Coral | <i>Chaetodon adiergastos</i>       | 0.000 | 0.690 | 0.000 | NA    | 0.000 | 0.000 | 209 | 0.453029 | 1     |
| Rub/EAM vs A.SG/Soft Coral | <i>Chaetodon auriga</i>            | 0.000 | 0.690 | 0.000 | NA    | 0.000 | 0.000 | 190 | 0.46472  | 1     |
| Rub/EAM vs A.SG/Soft Coral | <i>Chaetodon baronessa</i>         | 0.011 | 0.690 | 0.009 | 1.190 | 0.013 | 0.021 | 37  | 0.476319 | 0.009 |
| Rub/EAM vs A.SG/Soft Coral | <i>Chaetodon kleinii</i>           | 0.008 | 0.690 | 0.009 | 0.889 | 0.012 | 0.008 | 76  | 0.487898 | 0.959 |
| Rub/EAM vs A.SG/Soft Coral | <i>Chaetodon lineolatus</i>        | 0.001 | 0.690 | 0.003 | 0.192 | 0.000 | 0.001 | 34  | 0.498969 | 0.465 |
| Rub/EAM vs A.SG/Soft Coral | <i>Chaetodon lunula</i>            | 0.003 | 0.690 | 0.008 | 0.443 | 0.003 | 0.005 | 104 | 0.509818 | 0.16  |
| Rub/EAM vs A.SG/Soft Coral | <i>Chaetodon lunulatus</i>         | 0.008 | 0.690 | 0.010 | 0.784 | 0.014 | 0.005 | 232 | 0.520264 | 0.441 |
| Rub/EAM vs A.SG/Soft Coral | <i>Chaetodon melannotus</i>        | 0.000 | 0.690 | 0.000 | NA    | 0.000 | 0.000 | 129 | 0.53067  | 1     |
| Rub/EAM vs A.SG/Soft Coral | <i>Chaetodon mertensii</i>         | 0.001 | 0.690 | 0.005 | 0.277 | 0.000 | 0.003 | 73  | 0.541    | 0.232 |
| Rub/EAM vs A.SG/Soft Coral | <i>Chaetodon ocellicaudus</i>      | 0.002 | 0.690 | 0.006 | 0.288 | 0.003 | 0.000 | 197 | 0.55079  | 0.397 |
| Rub/EAM vs A.SG/Soft Coral | <i>Chaetodon octofasciatus</i>     | 0.001 | 0.690 | 0.005 | 0.192 | 0.000 | 0.002 | 227 | 0.560306 | 0.142 |
| Rub/EAM vs A.SG/Soft Coral | <i>Chaetodon ornatissimus</i>      | 0.001 | 0.690 | 0.003 | 0.192 | 0.000 | 0.001 | 20  | 0.569657 | 0.944 |
| Rub/EAM vs A.SG/Soft Coral | <i>Chaetodon pelewensis</i>        | 0.000 | 0.690 | 0.000 | NA    | 0.000 | 0.000 | 86  | 0.579001 | 1     |
| Rub/EAM vs A.SG/Soft Coral | <i>Chaetodon punctatofasciatus</i> | 0.002 | 0.690 | 0.006 | 0.314 | 0.002 | 0.002 | 74  | 0.588308 | 0.466 |

| Rub/EAM vs A.SG/Soft Coral | <i>Chaetodon rafflesii</i>       | 0.001   | 0.690   | 0.003 | 0.192 | 0.000 | 0.001 | 172 | 0.597553 | 0.928 |
|----------------------------|----------------------------------|---------|---------|-------|-------|-------|-------|-----|----------|-------|
| Rub/EAM vs A.SG/Soft Coral | <i>Chaetodon sp.</i>             | 0.000   | 0.690   | 0.000 | NA    | 0.000 | 0.000 | 100 | 0.606562 | 1     |
| Rub/EAM vs A.SG/Soft Coral | <i>Chaetodon ulietensis</i>      | 0.000   | 0.690   | 0.000 | NA    | 0.000 | 0.000 | 173 | 0.615399 | 1     |
| Rub/EAM vs A.SG/Soft Coral | <i>Chaetodon unimaculatus</i>    | 0.000   | 0.690   | 0.000 | NA    | 0.000 | 0.000 | 136 | 0.624089 | 1     |
| Rub/EAM vs A.SG/Soft Coral | <i>Chaetodon vagabundus</i>      | 0.004   | 0.690   | 0.009 | 0.488 | 0.004 | 0.006 | 4   | 0.632304 | 0.293 |
| Rub/EAM vs A.SG/Soft Coral | <i>Chelmon sp.</i>               | 0.000   | 0.690   | 0.000 | NA    | 0.000 | 0.000 | 120 | 0.640258 | 1     |
| Comparison                 | species                          | average | overall | sd    | ratio | ava   | avb   | ord | cusum    | p     |
| Rub/EAM vs A.CR/A.RF       | <i>Acanthurus nigricans</i>      | 0.000   | 0.705   | 0.000 | NA    | 0.000 | 0.000 | 8   | 0.018968 | 1     |
| Rub/EAM vs A.CR/A.RF       | <i>Acanthurus nigricauda</i>     | 0.000   | 0.705   | 0.000 | NA    | 0.000 | 0.000 | 162 | 0.035385 | 1     |
| Rub/EAM vs A.CR/A.RF       | <i>Acanthurus nigrofuscus</i>    | 0.003   | 0.705   | 0.008 | 0.423 | 0.006 | 0.000 | 172 | 0.051788 | 0.388 |
| Rub/EAM vs A.CR/A.RF       | <i>Acanthurus pyroferus</i>      | 0.004   | 0.705   | 0.007 | 0.610 | 0.005 | 0.005 | 77  | 0.068019 | 0.781 |
| Rub/EAM vs A.CR/A.RF       | <i>Acanthurus sp.</i>            | 0.000   | 0.705   | 0.000 | NA    | 0.000 | 0.000 | 178 | 0.083857 | 1     |
| Rub/EAM vs A.CR/A.RF       | <i>Acanthurus thompsoni</i>      | 0.002   | 0.705   | 0.006 | 0.301 | 0.000 | 0.003 | 164 | 0.099381 | 0.118 |
| Rub/EAM vs A.CR/A.RF       | <i>Acanthurus triostegus</i>     | 0.000   | 0.705   | 0.000 | NA    | 0.000 | 0.000 | 133 | 0.114711 | 1     |
| Rub/EAM vs A.CR/A.RF       | <i>Ctenochaetus binotatus</i>    | 0.013   | 0.705   | 0.010 | 1.343 | 0.035 | 0.016 | 131 | 0.129989 | 0.009 |
| Rub/EAM vs A.CR/A.RF       | <i>Ctenochaetus cyanocheilus</i> | 0.000   | 0.705   | 0.000 | NA    | 0.000 | 0.000 | 217 | 0.145057 | 1     |
| Rub/EAM vs A.CR/A.RF       | <i>Ctenochaetus sp.</i>          | 0.000   | 0.705   | 0.000 | NA    | 0.000 | 0.000 | 130 | 0.160074 | 1     |
| Rub/EAM vs A.CR/A.RF       | <i>Ctenochaetus striatus</i>     | 0.009   | 0.705   | 0.007 | 1.366 | 0.023 | 0.022 | 206 | 0.174525 | 0.427 |
| Rub/EAM vs A.CR/A.RF       | <i>Ctenochaetus tominiensis</i>  | 0.005   | 0.705   | 0.007 | 0.610 | 0.006 | 0.005 | 211 | 0.188599 | 0.289 |
| Rub/EAM vs A.CR/A.RF       | <i>Naso brevirostris</i>         | 0.001   | 0.705   | 0.003 | 0.301 | 0.000 | 0.002 | 37  | 0.202634 | 0.751 |
| Rub/EAM vs A.CR/A.RF       | <i>Naso hexacanthus</i>          | 0.003   | 0.705   | 0.006 | 0.430 | 0.000 | 0.005 | 140 | 0.216606 | 0.641 |
| Rub/EAM vs A.CR/A.RF       | <i>Naso lituratus</i>            | 0.006   | 0.705   | 0.007 | 0.748 | 0.002 | 0.010 | 123 | 0.230192 | 0.293 |
| Rub/EAM vs A.CR/A.RF       | <i>Naso minor</i>                | 0.004   | 0.705   | 0.005 | 0.769 | 0.007 | 0.003 | 34  | 0.243629 | 0.109 |
| Rub/EAM vs A.CR/A.RF       | <i>Naso sp.</i>                  | 0.000   | 0.705   | 0.000 | NA    | 0.000 | 0.000 | 11  | 0.257021 | 1     |
| Rub/EAM vs A.CR/A.RF       | <i>Naso unicornis</i>            | 0.004   | 0.705   | 0.007 | 0.527 | 0.003 | 0.006 | 33  | 0.270327 | 0.826 |
| Rub/EAM vs A.CR/A.RF       | <i>Naso vlamingii</i>            | 0.003   | 0.705   | 0.006 | 0.527 | 0.002 | 0.005 | 115 | 0.28358  | 0.014 |
| Rub/EAM vs A.CR/A.RF       | <i>Zebrasoma scopas</i>          | 0.008   | 0.705   | 0.007 | 1.168 | 0.010 | 0.017 | 205 | 0.296781 | 0.124 |
| Rub/EAM vs A.CR/A.RF       | <i>Zebrasoma veliferum</i>       | 0.000   | 0.705   | 0.000 | NA    | 0.000 | 0.000 | 232 | 0.309042 | 1     |
| Rub/EAM vs A.CR/A.RF       | <i>Balistoides viridescens</i>   | 0.000   | 0.705   | 0.000 | NA    | 0.000 | 0.000 | 126 | 0.321253 | 1     |
| Rub/EAM vs A.CR/A.RF       | <i>Caesio caeruleaurea</i>       | 0.002   | 0.705   | 0.006 | 0.301 | 0.000 | 0.004 | 78  | 0.333179 | 0.009 |
| Rub/EAM vs A.CR/A.RF       | <i>Caesio sp.</i>                | 0.000   | 0.705   | 0.000 | NA    | 0.000 | 0.000 | 20  | 0.345093 | 1     |

|                               |                                    |         |         |       |       |       |       |     |          |       |
|-------------------------------|------------------------------------|---------|---------|-------|-------|-------|-------|-----|----------|-------|
| Rub/EAM vs A.CR/A.RF          | <i>Caesio teres</i>                | 0.001   | 0.705   | 0.005 | 0.301 | 0.000 | 0.003 | 128 | 0.356865 | 0.003 |
| Rub/EAM vs A.CR/A.RF          | <i>Pterocaesio pisang</i>          | 0.002   | 0.705   | 0.005 | 0.301 | 0.000 | 0.003 | 195 | 0.368591 | 0.443 |
| Rub/EAM vs A.CR/A.RF          | <i>Pterocaesio tile</i>            | 0.003   | 0.705   | 0.006 | 0.520 | 0.002 | 0.005 | 227 | 0.380204 | 0.008 |
| Rub/EAM vs A.CR/A.RF          | <i>Caranx melampygus</i>           | 0.001   | 0.705   | 0.004 | 0.301 | 0.000 | 0.002 | 151 | 0.391817 | 0.234 |
| Rub/EAM vs A.CR/A.RF          | <i>Caranx sp.</i>                  | 0.001   | 0.705   | 0.004 | 0.301 | 0.000 | 0.003 | 159 | 0.403309 | 0.171 |
| Rub/EAM vs A.CR/A.RF          | <i>Elagatis bipinnulata</i>        | 0.000   | 0.705   | 0.000 | NA    | 0.000 | 0.000 | 134 | 0.414751 | 1     |
| Rub/EAM vs A.CR/A.RF          | <i>Chaetodon adiergastos</i>       | 0.001   | 0.705   | 0.005 | 0.301 | 0.000 | 0.003 | 208 | 0.425927 | 0.043 |
| Rub/EAM vs A.CR/A.RF          | <i>Chaetodon auriga</i>            | 0.000   | 0.705   | 0.000 | NA    | 0.000 | 0.000 | 122 | 0.436689 | 1     |
| Rub/EAM vs A.CR/A.RF          | <i>Chaetodon baronessa</i>         | 0.009   | 0.705   | 0.009 | 1.092 | 0.013 | 0.014 | 129 | 0.447443 | 0.364 |
| Rub/EAM vs A.CR/A.RF          | <i>Chaetodon kleinii</i>           | 0.009   | 0.705   | 0.008 | 1.206 | 0.012 | 0.017 | 190 | 0.458064 | 0.431 |
| Rub/EAM vs A.CR/A.RF          | <i>Chaetodon lineolatus</i>        | 0.000   | 0.705   | 0.000 | NA    | 0.000 | 0.000 | 104 | 0.46866  | 1     |
| Rub/EAM vs A.CR/A.RF          | <i>Chaetodon lunula</i>            | 0.001   | 0.705   | 0.005 | 0.288 | 0.003 | 0.000 | 203 | 0.478835 | 0.716 |
| Rub/EAM vs A.CR/A.RF          | <i>Chaetodon lunulatus</i>         | 0.010   | 0.705   | 0.009 | 1.097 | 0.014 | 0.015 | 224 | 0.488316 | 0.034 |
| Rub/EAM vs A.CR/A.RF          | <i>Chaetodon melannotus</i>        | 0.000   | 0.705   | 0.000 | NA    | 0.000 | 0.000 | 68  | 0.496981 | 1     |
| Rub/EAM vs A.CR/A.RF          | <i>Chaetodon mertensii</i>         | 0.000   | 0.705   | 0.000 | NA    | 0.000 | 0.000 | 73  | 0.50556  | 1     |
| Rub/EAM vs A.CR/A.RF          | <i>Chaetodon ocellicaudus</i>      | 0.004   | 0.705   | 0.007 | 0.529 | 0.003 | 0.005 | 160 | 0.514037 | 0.04  |
| Rub/EAM vs A.CR/A.RF          | <i>Chaetodon octofasciatus</i>     | 0.000   | 0.705   | 0.000 | NA    | 0.000 | 0.000 | 89  | 0.522512 | 1     |
| Rub/EAM vs A.CR/A.RF          | <i>Chaetodon ornatissimus</i>      | 0.005   | 0.705   | 0.009 | 0.570 | 0.000 | 0.010 | 136 | 0.530792 | 0.056 |
| Rub/EAM vs A.CR/A.RF          | <i>Chaetodon pelewensis</i>        | 0.000   | 0.705   | 0.000 | NA    | 0.000 | 0.000 | 15  | 0.538729 | 1     |
| Rub/EAM vs A.CR/A.RF          | <i>Chaetodon punctatofasciatus</i> | 0.003   | 0.705   | 0.006 | 0.523 | 0.002 | 0.005 | 71  | 0.546658 | 0.226 |
| Rub/EAM vs A.CR/A.RF          | <i>Chaetodon rafflesii</i>         | 0.001   | 0.705   | 0.004 | 0.301 | 0.000 | 0.002 | 100 | 0.554525 | 0.845 |
| Rub/EAM vs A.CR/A.RF          | <i>Chaetodon sp.</i>               | 0.000   | 0.705   | 0.000 | NA    | 0.000 | 0.000 | 209 | 0.56238  | 1     |
| Rub/EAM vs A.CR/A.RF          | <i>Chaetodon ulietensis</i>        | 0.002   | 0.705   | 0.006 | 0.301 | 0.000 | 0.004 | 132 | 0.570189 | 0.011 |
| Rub/EAM vs A.CR/A.RF          | <i>Chaetodon unimaculatus</i>      | 0.003   | 0.705   | 0.007 | 0.445 | 0.000 | 0.006 | 92  | 0.577978 | 0.003 |
| Rub/EAM vs A.CR/A.RF          | <i>Chaetodon vagabundus</i>        | 0.005   | 0.705   | 0.008 | 0.610 | 0.004 | 0.006 | 139 | 0.585666 | 0.284 |
| Rub/EAM vs A.CR/A.RF          | <i>Chelmon sp.</i>                 | 0.000   | 0.705   | 0.000 | NA    | 0.000 | 0.000 | 93  | 0.593322 | 1     |
| Comparison                    | species                            | average | overall | sd    | ratio | ava   | avb   | ord | cusum    | p     |
| Coral.A.MA vs A.SG/Soft Coral | <i>Acanthurus nigricans</i>        | 0.000   | 0.734   | 0.002 | 0.180 | 0.001 | 0.000 | 206 | 0.01915  | 0.919 |
| Coral.A.MA vs A.SG/Soft Coral | <i>Acanthurus nigricauda</i>       | 0.001   | 0.734   | 0.003 | 0.180 | 0.001 | 0.000 | 164 | 0.036499 | 0.532 |
| Coral.A.MA vs A.SG/Soft Coral | <i>Acanthurus nigrofuscus</i>      | 0.000   | 0.734   | 0.000 | NA    | 0.000 | 0.000 | 196 | 0.050767 | 1     |
| Coral.A.MA vs A.SG/Soft Coral | <i>Acanthurus pyroferus</i>        | 0.006   | 0.734   | 0.008 | 0.733 | 0.005 | 0.008 | 37  | 0.064553 | 0.608 |

|                               |                                  |       |       |       |       |       |       |     |          |       |
|-------------------------------|----------------------------------|-------|-------|-------|-------|-------|-------|-----|----------|-------|
| Coral.A.MA vs A.SG/Soft Coral | <i>Acanthurus sp.</i>            | 0.001 | 0.734 | 0.004 | 0.192 | 0.000 | 0.001 | 78  | 0.078242 | 0.108 |
| Coral.A.MA vs A.SG/Soft Coral | <i>Acanthurus thompsoni</i>      | 0.001 | 0.734 | 0.004 | 0.258 | 0.002 | 0.000 | 205 | 0.091059 | 0.606 |
| Coral.A.MA vs A.SG/Soft Coral | <i>Acanthurus triostegus</i>     | 0.000 | 0.734 | 0.003 | 0.180 | 0.001 | 0.000 | 20  | 0.103787 | 0.54  |
| Coral.A.MA vs A.SG/Soft Coral | <i>Ctenochaetus binotatus</i>    | 0.007 | 0.734 | 0.007 | 1.046 | 0.013 | 0.007 | 130 | 0.116361 | 0.999 |
| Coral.A.MA vs A.SG/Soft Coral | <i>Ctenochaetus cyanocheilus</i> | 0.001 | 0.734 | 0.003 | 0.180 | 0.001 | 0.000 | 33  | 0.128916 | 0.518 |
| Coral.A.MA vs A.SG/Soft Coral | <i>Ctenochaetus sp.</i>          | 0.001 | 0.734 | 0.005 | 0.305 | 0.003 | 0.000 | 178 | 0.141055 | 0.519 |
| Coral.A.MA vs A.SG/Soft Coral | <i>Ctenochaetus striatus</i>     | 0.009 | 0.734 | 0.006 | 1.415 | 0.026 | 0.016 | 209 | 0.153133 | 0.873 |
| Coral.A.MA vs A.SG/Soft Coral | <i>Ctenochaetus tominiensis</i>  | 0.005 | 0.734 | 0.006 | 0.789 | 0.008 | 0.003 | 68  | 0.165151 | 0.072 |
| Coral.A.MA vs A.SG/Soft Coral | <i>Naso brevirostris</i>         | 0.003 | 0.734 | 0.006 | 0.499 | 0.005 | 0.002 | 208 | 0.177065 | 0.023 |
| Coral.A.MA vs A.SG/Soft Coral | <i>Naso hexacanthus</i>          | 0.003 | 0.734 | 0.005 | 0.599 | 0.006 | 0.001 | 34  | 0.188887 | 0.618 |
| Coral.A.MA vs A.SG/Soft Coral | <i>Naso lituratus</i>            | 0.006 | 0.734 | 0.007 | 0.854 | 0.012 | 0.000 | 11  | 0.200672 | 0.029 |
| Coral.A.MA vs A.SG/Soft Coral | <i>Naso minor</i>                | 0.003 | 0.734 | 0.005 | 0.559 | 0.003 | 0.003 | 132 | 0.212334 | 0.342 |
| Coral.A.MA vs A.SG/Soft Coral | <i>Naso sp.</i>                  | 0.001 | 0.734 | 0.004 | 0.302 | 0.003 | 0.000 | 137 | 0.223885 | 0.16  |
| Coral.A.MA vs A.SG/Soft Coral | <i>Naso unicornis</i>            | 0.008 | 0.734 | 0.008 | 0.994 | 0.013 | 0.005 | 193 | 0.235137 | 0.001 |
| Coral.A.MA vs A.SG/Soft Coral | <i>Naso vlamingii</i>            | 0.000 | 0.734 | 0.003 | 0.180 | 0.001 | 0.000 | 202 | 0.246325 | 0.946 |
| Coral.A.MA vs A.SG/Soft Coral | <i>Zebrasoma scopas</i>          | 0.009 | 0.734 | 0.006 | 1.468 | 0.020 | 0.007 | 139 | 0.257337 | 0.001 |
| Coral.A.MA vs A.SG/Soft Coral | <i>Zebrasoma veliferum</i>       | 0.001 | 0.734 | 0.003 | 0.180 | 0.001 | 0.000 | 76  | 0.268205 | 0.539 |
| Coral.A.MA vs A.SG/Soft Coral | <i>Balistoides viridescens</i>   | 0.000 | 0.734 | 0.003 | 0.180 | 0.001 | 0.000 | 203 | 0.279047 | 0.527 |
| Coral.A.MA vs A.SG/Soft Coral | <i>Caesio caerulea</i>           | 0.000 | 0.734 | 0.000 | NA    | 0.000 | 0.000 | 98  | 0.289624 | 1     |
| Coral.A.MA vs A.SG/Soft Coral | <i>Caesio sp.</i>                | 0.001 | 0.734 | 0.003 | 0.180 | 0.001 | 0.000 | 181 | 0.30019  | 0.546 |
| Coral.A.MA vs A.SG/Soft Coral | <i>Caesio teres</i>              | 0.000 | 0.734 | 0.000 | NA    | 0.000 | 0.000 | 172 | 0.310703 | 1     |
| Coral.A.MA vs A.SG/Soft Coral | <i>Pterocaesio pisang</i>        | 0.001 | 0.734 | 0.004 | 0.192 | 0.000 | 0.002 | 118 | 0.321039 | 0.786 |
| Coral.A.MA vs A.SG/Soft Coral | <i>Pterocaesio tile</i>          | 0.000 | 0.734 | 0.001 | 0.180 | 0.001 | 0.000 | 140 | 0.331342 | 0.966 |
| Coral.A.MA vs A.SG/Soft Coral | <i>Caranx melampygus</i>         | 0.001 | 0.734 | 0.004 | 0.180 | 0.001 | 0.000 | 18  | 0.341597 | 0.555 |
| Coral.A.MA vs A.SG/Soft Coral | <i>Caranx sp.</i>                | 0.001 | 0.734 | 0.003 | 0.180 | 0.001 | 0.000 | 195 | 0.351846 | 0.663 |
| Coral.A.MA vs A.SG/Soft Coral | <i>Elagatis bipinnulata</i>      | 0.001 | 0.734 | 0.003 | 0.180 | 0.001 | 0.000 | 91  | 0.362066 | 0.505 |
| Coral.A.MA vs A.SG/Soft Coral | <i>Chaetodon adiergastos</i>     | 0.000 | 0.734 | 0.002 | 0.180 | 0.001 | 0.000 | 133 | 0.37214  | 0.812 |
| Coral.A.MA vs A.SG/Soft Coral | <i>Chaetodon auriga</i>          | 0.001 | 0.734 | 0.004 | 0.256 | 0.002 | 0.000 | 217 | 0.382162 | 0.283 |
| Coral.A.MA vs A.SG/Soft Coral | <i>Chaetodon baronessa</i>       | 0.009 | 0.734 | 0.007 | 1.387 | 0.019 | 0.021 | 8   | 0.392153 | 0.337 |
| Coral.A.MA vs A.SG/Soft Coral | <i>Chaetodon kleinii</i>         | 0.009 | 0.734 | 0.006 | 1.349 | 0.019 | 0.008 | 112 | 0.40188  | 0.869 |
| Coral.A.MA vs A.SG/Soft Coral | <i>Chaetodon lineolatus</i>      | 0.001 | 0.734 | 0.005 | 0.263 | 0.001 | 0.001 | 232 | 0.41133  | 0.234 |

| Coral.A.MA vs A.SG/Soft Coral | <i>Chaetodon lunula</i>            | 0.004   | 0.734   | 0.007 | 0.495 | 0.003 | 0.005 | 134 | 0.420716 | 0.025 |
|-------------------------------|------------------------------------|---------|---------|-------|-------|-------|-------|-----|----------|-------|
| Coral.A.MA vs A.SG/Soft Coral | <i>Chaetodon lunulatus</i>         | 0.010   | 0.734   | 0.006 | 1.660 | 0.022 | 0.005 | 86  | 0.430054 | 0.001 |
| Coral.A.MA vs A.SG/Soft Coral | <i>Chaetodon melannotus</i>        | 0.002   | 0.734   | 0.005 | 0.365 | 0.004 | 0.000 | 74  | 0.439138 | 0.061 |
| Coral.A.MA vs A.SG/Soft Coral | <i>Chaetodon mertensii</i>         | 0.001   | 0.734   | 0.005 | 0.277 | 0.000 | 0.003 | 84  | 0.448161 | 0.031 |
| Coral.A.MA vs A.SG/Soft Coral | <i>Chaetodon ocellicaudus</i>      | 0.000   | 0.734   | 0.000 | NA    | 0.000 | 0.000 | 100 | 0.457162 | 1     |
| Coral.A.MA vs A.SG/Soft Coral | <i>Chaetodon octofasciatus</i>     | 0.001   | 0.734   | 0.005 | 0.192 | 0.000 | 0.002 | 159 | 0.466124 | 0.128 |
| Coral.A.MA vs A.SG/Soft Coral | <i>Chaetodon ornatissimus</i>      | 0.002   | 0.734   | 0.005 | 0.374 | 0.003 | 0.001 | 197 | 0.474811 | 0.789 |
| Coral.A.MA vs A.SG/Soft Coral | <i>Chaetodon pelewensis</i>        | 0.004   | 0.734   | 0.006 | 0.568 | 0.007 | 0.000 | 162 | 0.483393 | 0.003 |
| Coral.A.MA vs A.SG/Soft Coral | <i>Chaetodon punctatofasciatus</i> | 0.002   | 0.734   | 0.007 | 0.346 | 0.003 | 0.002 | 190 | 0.491964 | 0.366 |
| Coral.A.MA vs A.SG/Soft Coral | <i>Chaetodon rafflesii</i>         | 0.004   | 0.734   | 0.007 | 0.560 | 0.007 | 0.001 | 15  | 0.500108 | 0.01  |
| Coral.A.MA vs A.SG/Soft Coral | <i>Chaetodon sp.</i>               | 0.001   | 0.734   | 0.003 | 0.180 | 0.001 | 0.000 | 129 | 0.508229 | 0.808 |
| Coral.A.MA vs A.SG/Soft Coral | <i>Chaetodon ulietensis</i>        | 0.000   | 0.734   | 0.000 | NA    | 0.000 | 0.000 | 211 | 0.515957 | 1     |
| Coral.A.MA vs A.SG/Soft Coral | <i>Chaetodon unimaculatus</i>      | 0.000   | 0.734   | 0.000 | NA    | 0.000 | 0.000 | 122 | 0.523673 | 1     |
| Coral.A.MA vs A.SG/Soft Coral | <i>Chaetodon vagabundus</i>        | 0.003   | 0.734   | 0.007 | 0.462 | 0.002 | 0.006 | 207 | 0.531324 | 0.665 |
| Coral.A.MA vs A.SG/Soft Coral | <i>Chelmon sp.</i>                 | 0.001   | 0.734   | 0.003 | 0.180 | 0.001 | 0.000 | 4   | 0.538923 | 0.572 |
| Comparison                    | species                            | average | overall | sd    | ratio | ava   | avb   | ord | cusum    | p     |
| Coral/A.MA vs A.CR/A.RF       | <i>Acanthurus nigricans</i>        | 0.000   | 0.665   | 0.002 | 0.179 | 0.001 | 0.000 | 217 | 0.014614 | 0.805 |
| Coral/A.MA vs A.CR/A.RF       | <i>Acanthurus nigricauda</i>       | 0.001   | 0.665   | 0.003 | 0.179 | 0.001 | 0.000 | 172 | 0.028012 | 0.395 |
| Coral/A.MA vs A.CR/A.RF       | <i>Acanthurus nigrofuscus</i>      | 0.000   | 0.665   | 0.000 | NA    | 0.000 | 0.000 | 203 | 0.04092  | 1     |
| Coral/A.MA vs A.CR/A.RF       | <i>Acanthurus pyroferus</i>        | 0.004   | 0.665   | 0.007 | 0.646 | 0.005 | 0.005 | 98  | 0.053591 | 0.849 |
| Coral/A.MA vs A.CR/A.RF       | <i>Acanthurus sp.</i>              | 0.000   | 0.665   | 0.000 | NA    | 0.000 | 0.000 | 37  | 0.06615  | 1     |
| Coral/A.MA vs A.CR/A.RF       | <i>Acanthurus thompsoni</i>        | 0.003   | 0.665   | 0.007 | 0.395 | 0.002 | 0.003 | 178 | 0.078707 | 0.038 |
| Coral/A.MA vs A.CR/A.RF       | <i>Acanthurus triostegus</i>       | 0.000   | 0.665   | 0.003 | 0.179 | 0.001 | 0.000 | 68  | 0.090877 | 0.433 |
| Coral/A.MA vs A.CR/A.RF       | <i>Ctenochaetus binotatus</i>      | 0.008   | 0.665   | 0.007 | 1.177 | 0.013 | 0.016 | 34  | 0.102941 | 0.974 |
| Coral/A.MA vs A.CR/A.RF       | <i>Ctenochaetus cyanocheilus</i>   | 0.001   | 0.665   | 0.003 | 0.179 | 0.001 | 0.000 | 151 | 0.114966 | 0.406 |
| Coral/A.MA vs A.CR/A.RF       | <i>Ctenochaetus sp.</i>            | 0.001   | 0.665   | 0.005 | 0.305 | 0.003 | 0.000 | 139 | 0.126865 | 0.454 |
| Coral/A.MA vs A.CR/A.RF       | <i>Ctenochaetus striatus</i>       | 0.006   | 0.665   | 0.006 | 0.997 | 0.026 | 0.022 | 33  | 0.138508 | 1     |
| Coral/A.MA vs A.CR/A.RF       | <i>Ctenochaetus tominiensis</i>    | 0.005   | 0.665   | 0.006 | 0.835 | 0.008 | 0.005 | 140 | 0.150091 | 0.091 |
| Coral/A.MA vs A.CR/A.RF       | <i>Naso brevirostris</i>           | 0.003   | 0.665   | 0.005 | 0.554 | 0.005 | 0.002 | 20  | 0.161662 | 0.133 |
| Coral/A.MA vs A.CR/A.RF       | <i>Naso hexacanthus</i>            | 0.005   | 0.665   | 0.007 | 0.705 | 0.006 | 0.005 | 8   | 0.173218 | 0.153 |
| Coral/A.MA vs A.CR/A.RF       | <i>Naso lituratus</i>              | 0.007   | 0.665   | 0.007 | 1.033 | 0.012 | 0.010 | 232 | 0.184622 | 0.018 |

|                         |                                    |       |       |       |       |       |       |     |          |       |
|-------------------------|------------------------------------|-------|-------|-------|-------|-------|-------|-----|----------|-------|
| Coral/A.MA vs A.CR/A.RF | <i>Naso minor</i>                  | 0.002 | 0.665 | 0.004 | 0.579 | 0.003 | 0.003 | 18  | 0.195877 | 0.57  |
| Coral/A.MA vs A.CR/A.RF | <i>Naso sp.</i>                    | 0.001 | 0.665 | 0.004 | 0.302 | 0.003 | 0.000 | 130 | 0.206967 | 0.248 |
| Coral/A.MA vs A.CR/A.RF | <i>Naso unicornis</i>              | 0.007 | 0.665 | 0.007 | 1.009 | 0.013 | 0.006 | 15  | 0.217941 | 0.041 |
| Coral/A.MA vs A.CR/A.RF | <i>Naso vlamingii</i>              | 0.003 | 0.665 | 0.006 | 0.480 | 0.001 | 0.005 | 195 | 0.228905 | 0.034 |
| Coral/A.MA vs A.CR/A.RF | <i>Zebrasoma scopas</i>            | 0.008 | 0.665 | 0.006 | 1.272 | 0.020 | 0.017 | 224 | 0.239829 | 0.277 |
| Coral/A.MA vs A.CR/A.RF | <i>Zebrasoma veliferum</i>         | 0.001 | 0.665 | 0.003 | 0.179 | 0.001 | 0.000 | 162 | 0.250676 | 0.427 |
| Coral/A.MA vs A.CR/A.RF | <i>Balistoides viridescens</i>     | 0.000 | 0.665 | 0.003 | 0.179 | 0.001 | 0.000 | 118 | 0.261382 | 0.426 |
| Coral/A.MA vs A.CR/A.RF | <i>Caesio caeruleaurea</i>         | 0.002 | 0.665 | 0.006 | 0.301 | 0.000 | 0.004 | 112 | 0.271826 | 0.055 |
| Coral/A.MA vs A.CR/A.RF | <i>Caesio sp.</i>                  | 0.001 | 0.665 | 0.003 | 0.179 | 0.001 | 0.000 | 208 | 0.282211 | 0.4   |
| Coral/A.MA vs A.CR/A.RF | <i>Caesio teres</i>                | 0.001 | 0.665 | 0.005 | 0.301 | 0.000 | 0.003 | 89  | 0.291982 | 0.053 |
| Coral/A.MA vs A.CR/A.RF | <i>Pterocaesio pisang</i>          | 0.002 | 0.665 | 0.005 | 0.301 | 0.000 | 0.003 | 92  | 0.301645 | 0.409 |
| Coral/A.MA vs A.CR/A.RF | <i>Pterocaesio tile</i>            | 0.002 | 0.665 | 0.005 | 0.461 | 0.001 | 0.005 | 129 | 0.311135 | 0.023 |
| Coral/A.MA vs A.CR/A.RF | <i>Caranx melampygus</i>           | 0.002 | 0.665 | 0.005 | 0.345 | 0.001 | 0.002 | 100 | 0.320576 | 0.141 |
| Coral/A.MA vs A.CR/A.RF | <i>Caranx sp.</i>                  | 0.002 | 0.665 | 0.005 | 0.350 | 0.001 | 0.003 | 206 | 0.330012 | 0.098 |
| Coral/A.MA vs A.CR/A.RF | <i>Elagatis bipinnulata</i>        | 0.001 | 0.665 | 0.003 | 0.179 | 0.001 | 0.000 | 84  | 0.339281 | 0.404 |
| Coral/A.MA vs A.CR/A.RF | <i>Chaetodon adiergastos</i>       | 0.002 | 0.665 | 0.005 | 0.350 | 0.001 | 0.003 | 190 | 0.348216 | 0.043 |
| Coral/A.MA vs A.CR/A.RF | <i>Chaetodon auriga</i>            | 0.001 | 0.665 | 0.004 | 0.256 | 0.002 | 0.000 | 160 | 0.357055 | 0.311 |
| Coral/A.MA vs A.CR/A.RF | <i>Chaetodon baronessa</i>         | 0.008 | 0.665 | 0.006 | 1.243 | 0.019 | 0.014 | 128 | 0.365796 | 0.936 |
| Coral/A.MA vs A.CR/A.RF | <i>Chaetodon kleinii</i>           | 0.008 | 0.665 | 0.006 | 1.280 | 0.019 | 0.017 | 42  | 0.374516 | 0.897 |
| Coral/A.MA vs A.CR/A.RF | <i>Chaetodon lineolatus</i>        | 0.001 | 0.665 | 0.004 | 0.179 | 0.001 | 0.000 | 188 | 0.38323  | 0.486 |
| Coral/A.MA vs A.CR/A.RF | <i>Chaetodon lunula</i>            | 0.002 | 0.665 | 0.004 | 0.377 | 0.003 | 0.000 | 111 | 0.391924 | 0.739 |
| Coral/A.MA vs A.CR/A.RF | <i>Chaetodon lunulatus</i>         | 0.008 | 0.665 | 0.006 | 1.364 | 0.022 | 0.015 | 93  | 0.400591 | 0.256 |
| Coral/A.MA vs A.CR/A.RF | <i>Chaetodon melannotus</i>        | 0.002 | 0.665 | 0.005 | 0.365 | 0.004 | 0.000 | 86  | 0.409143 | 0.175 |
| Coral/A.MA vs A.CR/A.RF | <i>Chaetodon mertensii</i>         | 0.000 | 0.665 | 0.000 | NA    | 0.000 | 0.000 | 11  | 0.417692 | 1     |
| Coral/A.MA vs A.CR/A.RF | <i>Chaetodon ocellicaudus</i>      | 0.003 | 0.665 | 0.006 | 0.447 | 0.000 | 0.005 | 193 | 0.426161 | 0.125 |
| Coral/A.MA vs A.CR/A.RF | <i>Chaetodon octofasciatus</i>     | 0.000 | 0.665 | 0.000 | NA    | 0.000 | 0.000 | 155 | 0.434346 | 1     |
| Coral/A.MA vs A.CR/A.RF | <i>Chaetodon ornatissimus</i>      | 0.006 | 0.665 | 0.009 | 0.653 | 0.003 | 0.010 | 170 | 0.442443 | 0.01  |
| Coral/A.MA vs A.CR/A.RF | <i>Chaetodon pelewensis</i>        | 0.004 | 0.665 | 0.006 | 0.568 | 0.007 | 0.000 | 164 | 0.450518 | 0.053 |
| Coral/A.MA vs A.CR/A.RF | <i>Chaetodon punctatofasciatus</i> | 0.003 | 0.665 | 0.006 | 0.542 | 0.003 | 0.005 | 55  | 0.45857  | 0.118 |
| Coral/A.MA vs A.CR/A.RF | <i>Chaetodon rafflesii</i>         | 0.004 | 0.665 | 0.007 | 0.603 | 0.007 | 0.002 | 108 | 0.466458 | 0.08  |
| Coral/A.MA vs A.CR/A.RF | <i>Chaetodon sp.</i>               | 0.001 | 0.665 | 0.003 | 0.179 | 0.001 | 0.000 | 12  | 0.474244 | 0.65  |

| Coral/A.MA vs A.CR/A.RF      | <i>Chaetodon ulietensis</i>      | 0.002   | 0.665   | 0.006 | 0.301 | 0.000 | 0.004 | 209 | 0.482026 | 0.052 |
|------------------------------|----------------------------------|---------|---------|-------|-------|-------|-------|-----|----------|-------|
| Coral/A.MA vs A.CR/A.RF      | <i>Chaetodon unimaculatus</i>    | 0.003   | 0.665   | 0.007 | 0.446 | 0.000 | 0.006 | 191 | 0.4897   | 0.007 |
| Coral/A.MA vs A.CR/A.RF      | <i>Chaetodon vagabundus</i>      | 0.004   | 0.665   | 0.006 | 0.623 | 0.002 | 0.006 | 104 | 0.497341 | 0.534 |
| Coral/A.MA vs A.CR/A.RF      | <i>Chelmon sp.</i>               | 0.001   | 0.665   | 0.003 | 0.179 | 0.001 | 0.000 | 77  | 0.504917 | 0.426 |
| Comparison                   | species                          | average | overall | sd    | ratio | ava   | avb   | ord | cusum    | p     |
| A.SG/Soft Coral vs A.CR/A.RF | <i>Acanthurus nigricans</i>      | 0.000   | 0.705   | 0.000 | NA    | 0.000 | 0.000 | 206 | 0.01665  | 1     |
| A.SG/Soft Coral vs A.CR/A.RF | <i>Acanthurus nigricauda</i>     | 0.000   | 0.705   | 0.000 | NA    | 0.000 | 0.000 | 196 | 0.032825 | 1     |
| A.SG/Soft Coral vs A.CR/A.RF | <i>Acanthurus nigrofuscus</i>    | 0.000   | 0.705   | 0.000 | NA    | 0.000 | 0.000 | 164 | 0.048793 | 1     |
| A.SG/Soft Coral vs A.CR/A.RF | <i>Acanthurus pyroferus</i>      | 0.006   | 0.705   | 0.008 | 0.714 | 0.008 | 0.005 | 172 | 0.063776 | 0.579 |
| A.SG/Soft Coral vs A.CR/A.RF | <i>Acanthurus sp.</i>            | 0.001   | 0.705   | 0.004 | 0.192 | 0.001 | 0.000 | 78  | 0.078361 | 0.331 |
| A.SG/Soft Coral vs A.CR/A.RF | <i>Acanthurus thompsoni</i>      | 0.002   | 0.705   | 0.006 | 0.301 | 0.000 | 0.003 | 217 | 0.092883 | 0.21  |
| A.SG/Soft Coral vs A.CR/A.RF | <i>Acanthurus triostegus</i>     | 0.000   | 0.705   | 0.000 | NA    | 0.000 | 0.000 | 205 | 0.107123 | 1     |
| A.SG/Soft Coral vs A.CR/A.RF | <i>Ctenochaetus binotatus</i>    | 0.008   | 0.705   | 0.007 | 1.157 | 0.007 | 0.016 | 33  | 0.120841 | 0.918 |
| A.SG/Soft Coral vs A.CR/A.RF | <i>Ctenochaetus cyanocheilus</i> | 0.000   | 0.705   | 0.000 | NA    | 0.000 | 0.000 | 178 | 0.134058 | 1     |
| A.SG/Soft Coral vs A.CR/A.RF | <i>Ctenochaetus sp.</i>          | 0.000   | 0.705   | 0.000 | NA    | 0.000 | 0.000 | 130 | 0.146824 | 1     |
| A.SG/Soft Coral vs A.CR/A.RF | <i>Ctenochaetus striatus</i>     | 0.009   | 0.705   | 0.007 | 1.278 | 0.016 | 0.022 | 140 | 0.159475 | 0.696 |
| A.SG/Soft Coral vs A.CR/A.RF | <i>Ctenochaetus tominiensis</i>  | 0.004   | 0.705   | 0.006 | 0.560 | 0.003 | 0.005 | 11  | 0.171915 | 0.594 |
| A.SG/Soft Coral vs A.CR/A.RF | <i>Naso brevirostris</i>         | 0.002   | 0.705   | 0.005 | 0.336 | 0.002 | 0.002 | 132 | 0.184108 | 0.605 |
| A.SG/Soft Coral vs A.CR/A.RF | <i>Naso hexacanthus</i>          | 0.003   | 0.705   | 0.006 | 0.472 | 0.001 | 0.005 | 195 | 0.196135 | 0.601 |
| A.SG/Soft Coral vs A.CR/A.RF | <i>Naso lituratus</i>            | 0.005   | 0.705   | 0.007 | 0.703 | 0.000 | 0.010 | 34  | 0.208145 | 0.398 |
| A.SG/Soft Coral vs A.CR/A.RF | <i>Naso minor</i>                | 0.003   | 0.705   | 0.005 | 0.573 | 0.003 | 0.003 | 137 | 0.220144 | 0.477 |
| A.SG/Soft Coral vs A.CR/A.RF | <i>Naso sp.</i>                  | 0.000   | 0.705   | 0.000 | NA    | 0.000 | 0.000 | 20  | 0.232107 | 1     |
| A.SG/Soft Coral vs A.CR/A.RF | <i>Naso unicornis</i>            | 0.005   | 0.705   | 0.008 | 0.599 | 0.005 | 0.006 | 162 | 0.243925 | 0.681 |
| A.SG/Soft Coral vs A.CR/A.RF | <i>Naso vlamingii</i>            | 0.002   | 0.705   | 0.006 | 0.446 | 0.000 | 0.005 | 8   | 0.255428 | 0.062 |
| A.SG/Soft Coral vs A.CR/A.RF | <i>Zebrasoma scopas</i>          | 0.008   | 0.705   | 0.007 | 1.163 | 0.007 | 0.017 | 151 | 0.266893 | 0.066 |
| A.SG/Soft Coral vs A.CR/A.RF | <i>Zebrasoma veliferum</i>       | 0.000   | 0.705   | 0.000 | NA    | 0.000 | 0.000 | 193 | 0.278316 | 1     |
| A.SG/Soft Coral vs A.CR/A.RF | <i>Balistoides viridescens</i>   | 0.000   | 0.705   | 0.000 | NA    | 0.000 | 0.000 | 76  | 0.289601 | 1     |
| A.SG/Soft Coral vs A.CR/A.RF | <i>Caesio caeruleaurea</i>       | 0.002   | 0.705   | 0.006 | 0.301 | 0.000 | 0.004 | 37  | 0.300873 | 0.109 |
| A.SG/Soft Coral vs A.CR/A.RF | <i>Caesio sp.</i>                | 0.000   | 0.705   | 0.000 | NA    | 0.000 | 0.000 | 181 | 0.311718 | 1     |
| A.SG/Soft Coral vs A.CR/A.RF | <i>Caesio teres</i>              | 0.001   | 0.705   | 0.005 | 0.301 | 0.000 | 0.003 | 74  | 0.322538 | 0.105 |
| A.SG/Soft Coral vs A.CR/A.RF | <i>Pterocaesio pisang</i>        | 0.002   | 0.705   | 0.006 | 0.356 | 0.002 | 0.003 | 202 | 0.333187 | 0.239 |



|                              |                                    |       |       |       |       |       |       |     |          |       |
|------------------------------|------------------------------------|-------|-------|-------|-------|-------|-------|-----|----------|-------|
| A.SG/Soft Coral vs A.CR/A.RF | <i>Pterocaesio tile</i>            | 0.002 | 0.705 | 0.005 | 0.430 | 0.000 | 0.005 | 159 | 0.343815 | 0.032 |
| A.SG/Soft Coral vs A.CR/A.RF | <i>Caranx melampygus</i>           | 0.001 | 0.705 | 0.004 | 0.301 | 0.000 | 0.002 | 91  | 0.354428 | 0.268 |
| A.SG/Soft Coral vs A.CR/A.RF | <i>Caranx sp.</i>                  | 0.001 | 0.705 | 0.004 | 0.301 | 0.000 | 0.003 | 133 | 0.364937 | 0.235 |
| A.SG/Soft Coral vs A.CR/A.RF | <i>Elagatis bipinnulata</i>        | 0.000 | 0.705 | 0.000 | NA    | 0.000 | 0.000 | 197 | 0.375365 | 1     |
| A.SG/Soft Coral vs A.CR/A.RF | <i>Chaetodon adiergastos</i>       | 0.001 | 0.705 | 0.005 | 0.301 | 0.000 | 0.003 | 209 | 0.385337 | 0.135 |
| A.SG/Soft Coral vs A.CR/A.RF | <i>Chaetodon auriga</i>            | 0.000 | 0.705 | 0.000 | NA    | 0.000 | 0.000 | 134 | 0.395273 | 1     |
| A.SG/Soft Coral vs A.CR/A.RF | <i>Chaetodon baronessa</i>         | 0.010 | 0.705 | 0.008 | 1.236 | 0.021 | 0.014 | 73  | 0.405134 | 0.192 |
| A.SG/Soft Coral vs A.CR/A.RF | <i>Chaetodon kleinii</i>           | 0.008 | 0.705 | 0.007 | 1.154 | 0.008 | 0.017 | 136 | 0.414995 | 0.751 |
| A.SG/Soft Coral vs A.CR/A.RF | <i>Chaetodon lineolatus</i>        | 0.001 | 0.705 | 0.003 | 0.192 | 0.001 | 0.000 | 89  | 0.424709 | 0.623 |
| A.SG/Soft Coral vs A.CR/A.RF | <i>Chaetodon lunula</i>            | 0.002 | 0.705 | 0.007 | 0.340 | 0.005 | 0.000 | 232 | 0.43442  | 0.475 |
| A.SG/Soft Coral vs A.CR/A.RF | <i>Chaetodon lunulatus</i>         | 0.008 | 0.705 | 0.008 | 1.037 | 0.005 | 0.015 | 211 | 0.444009 | 0.444 |
| A.SG/Soft Coral vs A.CR/A.RF | <i>Chaetodon melannotus</i>        | 0.000 | 0.705 | 0.000 | NA    | 0.000 | 0.000 | 160 | 0.452997 | 1     |
| A.SG/Soft Coral vs A.CR/A.RF | <i>Chaetodon mertensii</i>         | 0.001 | 0.705 | 0.005 | 0.277 | 0.003 | 0.000 | 128 | 0.461815 | 0.265 |
| A.SG/Soft Coral vs A.CR/A.RF | <i>Chaetodon ocellicaudus</i>      | 0.003 | 0.705 | 0.006 | 0.447 | 0.000 | 0.005 | 203 | 0.470622 | 0.132 |
| A.SG/Soft Coral vs A.CR/A.RF | <i>Chaetodon octofasciatus</i>     | 0.001 | 0.705 | 0.005 | 0.192 | 0.002 | 0.000 | 224 | 0.479338 | 0.386 |
| A.SG/Soft Coral vs A.CR/A.RF | <i>Chaetodon ornatissimus</i>      | 0.005 | 0.705 | 0.009 | 0.602 | 0.001 | 0.010 | 190 | 0.48803  | 0.02  |
| A.SG/Soft Coral vs A.CR/A.RF | <i>Chaetodon pelewensis</i>        | 0.000 | 0.705 | 0.000 | NA    | 0.000 | 0.000 | 92  | 0.49664  | 1     |
| A.SG/Soft Coral vs A.CR/A.RF | <i>Chaetodon punctatofasciatus</i> | 0.003 | 0.705 | 0.008 | 0.461 | 0.002 | 0.005 | 122 | 0.505026 | 0.121 |
| A.SG/Soft Coral vs A.CR/A.RF | <i>Chaetodon rafflesii</i>         | 0.002 | 0.705 | 0.005 | 0.357 | 0.001 | 0.002 | 115 | 0.513392 | 0.723 |
| A.SG/Soft Coral vs A.CR/A.RF | <i>Chaetodon sp.</i>               | 0.000 | 0.705 | 0.000 | NA    | 0.000 | 0.000 | 55  | 0.521684 | 1     |
| A.SG/Soft Coral vs A.CR/A.RF | <i>Chaetodon ulietensis</i>        | 0.002 | 0.705 | 0.006 | 0.301 | 0.000 | 0.004 | 77  | 0.529918 | 0.097 |
| A.SG/Soft Coral vs A.CR/A.RF | <i>Chaetodon unimaculatus</i>      | 0.003 | 0.705 | 0.007 | 0.446 | 0.000 | 0.006 | 68  | 0.538072 | 0.015 |
| A.SG/Soft Coral vs A.CR/A.RF | <i>Chaetodon vagabundus</i>        | 0.005 | 0.705 | 0.008 | 0.677 | 0.006 | 0.006 | 4   | 0.54591  | 0.163 |
| A.SG/Soft Coral vs A.CR/A.RF | <i>Chelmon sp.</i>                 | 0.000 | 0.705 | 0.000 | NA    | 0.000 | 0.000 | 93  | 0.553726 | 1     |

B. SIMPER analysis output for parrotfishes

| Comparison                | species                       | average | overall | sd    | ratio | ava   | avb   | ord | cusum | p     |
|---------------------------|-------------------------------|---------|---------|-------|-------|-------|-------|-----|-------|-------|
| A.MG/A.Sand vs Rub/EAM    | <i>Chlorurus bleekeri</i>     | 0.070   | 0.697   | 0.047 | 1.473 | 0.079 | 0.188 | 9   | 0.109 | 0.006 |
| A.MG/A.Sand vs Rub/EAM    | <i>Chlorurus bowersi</i>      | 0.052   | 0.697   | 0.055 | 0.947 | 0.020 | 0.098 | 1   | 0.209 | 0.001 |
| A.MG/A.Sand vs Rub/EAM    | <i>Chlorurus microrhinos</i>  | 0.000   | 0.697   | 0.000 | NA    | 0.000 | 0.000 | 12  | 0.305 | 1     |
| A.MG/A.Sand vs Rub/EAM    | <i>Chlorurus sp.</i>          | 0.014   | 0.697   | 0.034 | 0.401 | 0.027 | 0.000 | 13  | 0.398 | 0.36  |
| A.MG/A.Sand vs Rub/EAM    | <i>Chlorurus spilurus</i>     | 0.040   | 0.697   | 0.042 | 0.959 | 0.055 | 0.057 | 2   | 0.472 | 0.207 |
| A.MG/A.Sand vs Rub/EAM    | <i>Hipposcarus longiceps</i>  | 0.000   | 0.697   | 0.000 | NA    | 0.000 | 0.000 | 7   | 0.542 | 1     |
| A.MG/A.Sand vs Rub/EAM    | <i>Scarus chameleon</i>       | 0.049   | 0.697   | 0.107 | 0.459 | 0.086 | 0.022 | 11  | 0.612 | 0.132 |
| A.MG/A.Sand vs Rub/EAM    | <i>Scarus dimidiatus</i>      | 0.041   | 0.697   | 0.030 | 1.341 | 0.005 | 0.082 | 10  | 0.673 | 0.831 |
| A.MG/A.Sand vs Rub/EAM    | <i>Scarus flavipectoralis</i> | 0.076   | 0.697   | 0.091 | 0.834 | 0.148 | 0.131 | 8   | 0.731 | 0.242 |
| A.MG/A.Sand vs Rub/EAM    | <i>Scarus forsteni</i>        | 0.043   | 0.697   | 0.058 | 0.729 | 0.032 | 0.065 | 5   | 0.789 | 0.058 |
| A.MG/A.Sand vs Rub/EAM    | <i>Scarus ghobban</i>         | 0.048   | 0.697   | 0.115 | 0.420 | 0.083 | 0.020 | 18  | 0.845 | 0.438 |
| A.MG/A.Sand vs Rub/EAM    | <i>Scarus hypselopterus</i>   | 0.067   | 0.697   | 0.091 | 0.736 | 0.094 | 0.107 | 16  | 0.897 | 0.112 |
| A.MG/A.Sand vs Rub/EAM    | <i>Scarus niger</i>           | 0.065   | 0.697   | 0.049 | 1.321 | 0.154 | 0.151 | 19  | 0.938 | 0.451 |
| A.MG/A.Sand vs Rub/EAM    | <i>Scarus prasiognathos</i>   | 0.000   | 0.697   | 0.000 | NA    | 0.000 | 0.000 | 15  | 0.964 | 1     |
| A.MG/A.Sand vs Rub/EAM    | <i>Scarus psitticus</i>       | 0.018   | 0.697   | 0.036 | 0.491 | 0.029 | 0.009 | 4   | 0.983 | 0.771 |
| A.MG/A.Sand vs Rub/EAM    | <i>Scarus rivulatus</i>       | 0.036   | 0.697   | 0.080 | 0.458 | 0.067 | 0.010 | 17  | 1.000 | 0.695 |
| A.MG/A.Sand vs Rub/EAM    | <i>Scarus schlegeli</i>       | 0.012   | 0.697   | 0.036 | 0.323 | 0.023 | 0.000 | 3   | 1.000 | 0.474 |
| A.MG/A.Sand vs Rub/EAM    | <i>Scarus sp.</i>             | 0.039   | 0.697   | 0.060 | 0.656 | 0.069 | 0.021 | 6   | 1.000 | 0.884 |
| A.MG/A.Sand vs Rub/EAM    | <i>Scarus tricolor</i>        | 0.029   | 0.697   | 0.039 | 0.728 | 0.028 | 0.040 | 14  | 1.000 | 0.93  |
| Comparison                | species                       | average | overall | sd    | ratio | ava   | avb   | ord | cusum | p     |
| A.MG/A.Sand vs Coral/A.MA | <i>Chlorurus bleekeri</i>     | 0.077   | 0.698   | 0.048 | 1.583 | 0.079 | 0.213 | 1   | 0.110 | 0.001 |
| A.MG/A.Sand vs Coral/A.MA | <i>Chlorurus bowersi</i>      | 0.016   | 0.698   | 0.038 | 0.431 | 0.020 | 0.016 | 9   | 0.217 | 0.848 |
| A.MG/A.Sand vs Coral/A.MA | <i>Chlorurus microrhinos</i>  | 0.000   | 0.698   | 0.000 | NA    | 0.000 | 0.000 | 18  | 0.319 | 1     |
| A.MG/A.Sand vs Coral/A.MA | <i>Chlorurus sp.</i>          | 0.014   | 0.698   | 0.034 | 0.401 | 0.027 | 0.000 | 8   | 0.419 | 0.334 |
| A.MG/A.Sand vs Coral/A.MA | <i>Chlorurus spilurus</i>     | 0.037   | 0.698   | 0.049 | 0.759 | 0.055 | 0.038 | 13  | 0.517 | 0.275 |

| A.MG/A.Sand vs Coral/A.MA      | <i>Hipposcarus longiceps</i>  | 0.007   | 0.698   | 0.026 | 0.258 | 0.000 | 0.013 | 11  | 0.589 | 0.249 |
|--------------------------------|-------------------------------|---------|---------|-------|-------|-------|-------|-----|-------|-------|
| A.MG/A.Sand vs Coral/A.MA      | <i>Scarus chameleon</i>       | 0.043   | 0.698   | 0.110 | 0.392 | 0.086 | 0.000 | 12  | 0.660 | 0.091 |
| A.MG/A.Sand vs Coral/A.MA      | <i>Scarus dimidiatus</i>      | 0.070   | 0.698   | 0.048 | 1.456 | 0.005 | 0.143 | 7   | 0.722 | 0.001 |
| A.MG/A.Sand vs Coral/A.MA      | <i>Scarus flavipectoralis</i> | 0.075   | 0.698   | 0.100 | 0.750 | 0.148 | 0.071 | 16  | 0.783 | 0.223 |
| A.MG/A.Sand vs Coral/A.MA      | <i>Scarus forsteni</i>        | 0.020   | 0.698   | 0.056 | 0.353 | 0.032 | 0.010 | 5   | 0.837 | 0.787 |
| A.MG/A.Sand vs Coral/A.MA      | <i>Scarus ghobban</i>         | 0.050   | 0.698   | 0.116 | 0.430 | 0.083 | 0.024 | 19  | 0.874 | 0.406 |
| A.MG/A.Sand vs Coral/A.MA      | <i>Scarus hypselopterus</i>   | 0.049   | 0.698   | 0.107 | 0.462 | 0.094 | 0.011 | 10  | 0.902 | 0.444 |
| A.MG/A.Sand vs Coral/A.MA      | <i>Scarus niger</i>           | 0.068   | 0.698   | 0.052 | 1.317 | 0.154 | 0.250 | 17  | 0.927 | 0.132 |
| A.MG/A.Sand vs Coral/A.MA      | <i>Scarus prasiognathos</i>   | 0.000   | 0.698   | 0.000 | NA    | 0.000 | 0.000 | 2   | 0.950 | 1     |
| A.MG/A.Sand vs Coral/A.MA      | <i>Scarus psitticus</i>       | 0.014   | 0.698   | 0.035 | 0.406 | 0.029 | 0.000 | 15  | 0.971 | 0.957 |
| A.MG/A.Sand vs Coral/A.MA      | <i>Scarus rivulatus</i>       | 0.043   | 0.698   | 0.081 | 0.529 | 0.067 | 0.027 | 4   | 0.990 | 0.503 |
| A.MG/A.Sand vs Coral/A.MA      | <i>Scarus schlegeli</i>       | 0.017   | 0.698   | 0.046 | 0.364 | 0.023 | 0.012 | 6   | 1.000 | 0.158 |
| A.MG/A.Sand vs Coral/A.MA      | <i>Scarus sp.</i>             | 0.071   | 0.698   | 0.058 | 1.239 | 0.069 | 0.141 | 3   | 1.000 | 0.003 |
| A.MG/A.Sand vs Coral/A.MA      | <i>Scarus tricolor</i>        | 0.026   | 0.698   | 0.044 | 0.597 | 0.028 | 0.032 | 14  | 1.000 | 0.998 |
| Comparison                     | species                       | average | overall | sd    | ratio | ava   | avb   | ord | cusum | p     |
| A.MG/A.Sand vs A.SG/Soft Coral | <i>Chlorurus bleekeri</i>     | 0.056   | 0.723   | 0.042 | 1.330 | 0.079 | 0.125 | 9   | 0.111 | 0.431 |
| A.MG/A.Sand vs A.SG/Soft Coral | <i>Chlorurus bowersi</i>      | 0.016   | 0.723   | 0.037 | 0.441 | 0.020 | 0.015 | 11  | 0.221 | 0.834 |
| A.MG/A.Sand vs A.SG/Soft Coral | <i>Chlorurus microrhinos</i>  | 0.000   | 0.723   | 0.000 | NA    | 0.000 | 0.000 | 16  | 0.311 | 1     |
| A.MG/A.Sand vs A.SG/Soft Coral | <i>Chlorurus sp.</i>          | 0.023   | 0.723   | 0.046 | 0.505 | 0.027 | 0.024 | 13  | 0.400 | 0.01  |
| A.MG/A.Sand vs A.SG/Soft Coral | <i>Chlorurus spilurus</i>     | 0.035   | 0.723   | 0.045 | 0.778 | 0.055 | 0.032 | 12  | 0.487 | 0.453 |
| A.MG/A.Sand vs A.SG/Soft Coral | <i>Hipposcarus longiceps</i>  | 0.000   | 0.723   | 0.000 | NA    | 0.000 | 0.000 | 1   | 0.565 | 1     |
| A.MG/A.Sand vs A.SG/Soft Coral | <i>Scarus chameleon</i>       | 0.049   | 0.723   | 0.112 | 0.434 | 0.086 | 0.015 | 19  | 0.634 | 0.024 |
| A.MG/A.Sand vs A.SG/Soft Coral | <i>Scarus dimidiatus</i>      | 0.028   | 0.723   | 0.032 | 0.887 | 0.005 | 0.056 | 7   | 0.701 | 1     |
| A.MG/A.Sand vs A.SG/Soft Coral | <i>Scarus flavipectoralis</i> | 0.081   | 0.723   | 0.091 | 0.889 | 0.148 | 0.150 | 18  | 0.758 | 0.044 |
| A.MG/A.Sand vs A.SG/Soft Coral | <i>Scarus forsteni</i>        | 0.029   | 0.723   | 0.063 | 0.459 | 0.032 | 0.031 | 5   | 0.806 | 0.327 |
| A.MG/A.Sand vs A.SG/Soft Coral | <i>Scarus ghobban</i>         | 0.079   | 0.723   | 0.108 | 0.734 | 0.083 | 0.104 | 15  | 0.850 | 0.002 |
| A.MG/A.Sand vs A.SG/Soft Coral | <i>Scarus hypselopterus</i>   | 0.063   | 0.723   | 0.098 | 0.646 | 0.094 | 0.078 | 10  | 0.890 | 0.04  |
| A.MG/A.Sand vs A.SG/Soft Coral | <i>Scarus niger</i>           | 0.064   | 0.723   | 0.050 | 1.297 | 0.154 | 0.116 | 8   | 0.929 | 0.462 |
| A.MG/A.Sand vs A.SG/Soft Coral | <i>Scarus prasiognathos</i>   | 0.000   | 0.723   | 0.000 | NA    | 0.000 | 0.000 | 4   | 0.961 | 1     |
| A.MG/A.Sand vs A.SG/Soft Coral | <i>Scarus psitticus</i>       | 0.032   | 0.723   | 0.046 | 0.687 | 0.029 | 0.046 | 2   | 0.984 | 0.072 |
| A.MG/A.Sand vs A.SG/Soft Coral | <i>Scarus rivulatus</i>       | 0.065   | 0.723   | 0.076 | 0.852 | 0.067 | 0.093 | 17  | 1.000 | 0.003 |

| A.MG/A.Sand vs A.SG/Soft Coral | <i>Scarus schlegeli</i>       | 0.012   | 0.723   | 0.036 | 0.323 | 0.023 | 0.000 | 3   | 1.000 | 0.479 |
|--------------------------------|-------------------------------|---------|---------|-------|-------|-------|-------|-----|-------|-------|
| A.MG/A.Sand vs A.SG/Soft Coral | <i>Scarus sp.</i>             | 0.041   | 0.723   | 0.065 | 0.631 | 0.069 | 0.022 | 6   | 1.000 | 0.92  |
| A.MG/A.Sand vs A.SG/Soft Coral | <i>Scarus tricolor</i>        | 0.050   | 0.723   | 0.058 | 0.862 | 0.028 | 0.092 | 14  | 1.000 | 0.064 |
| Comparison                     | species                       | average | overall | sd    | ratio | ava   | avb   | ord | cusum | p     |
| A.MG/A.Sand vs A.CR/A.RF       | <i>Chlorurus bleekeri</i>     | 0.065   | 0.697   | 0.040 | 1.625 | 0.079 | 0.181 | 9   | 0.109 | 0.053 |
| A.MG/A.Sand vs A.CR/A.RF       | <i>Chlorurus bowersi</i>      | 0.010   | 0.697   | 0.034 | 0.294 | 0.020 | 0.000 | 1   | 0.203 | 0.937 |
| A.MG/A.Sand vs A.CR/A.RF       | <i>Chlorurus microrhinos</i>  | 0.020   | 0.697   | 0.047 | 0.424 | 0.000 | 0.040 | 12  | 0.290 | 0.013 |
| A.MG/A.Sand vs A.CR/A.RF       | <i>Chlorurus sp.</i>          | 0.014   | 0.697   | 0.034 | 0.401 | 0.027 | 0.000 | 13  | 0.373 | 0.381 |
| A.MG/A.Sand vs A.CR/A.RF       | <i>Chlorurus spilurus</i>     | 0.037   | 0.697   | 0.041 | 0.908 | 0.055 | 0.044 | 7   | 0.455 | 0.356 |
| A.MG/A.Sand vs A.CR/A.RF       | <i>Hipposcarus longiceps</i>  | 0.000   | 0.697   | 0.000 | NA    | 0.000 | 0.000 | 11  | 0.528 | 1     |
| A.MG/A.Sand vs A.CR/A.RF       | <i>Scarus chameleon</i>       | 0.057   | 0.697   | 0.103 | 0.560 | 0.086 | 0.052 | 19  | 0.592 | 0.057 |
| A.MG/A.Sand vs A.CR/A.RF       | <i>Scarus dimidiatus</i>      | 0.024   | 0.697   | 0.030 | 0.809 | 0.005 | 0.048 | 16  | 0.653 | 1     |
| A.MG/A.Sand vs A.CR/A.RF       | <i>Scarus flavipectoralis</i> | 0.076   | 0.697   | 0.098 | 0.779 | 0.148 | 0.085 | 18  | 0.713 | 0.225 |
| A.MG/A.Sand vs A.CR/A.RF       | <i>Scarus forsteni</i>        | 0.027   | 0.697   | 0.057 | 0.470 | 0.032 | 0.027 | 15  | 0.767 | 0.409 |
| A.MG/A.Sand vs A.CR/A.RF       | <i>Scarus ghobban</i>         | 0.051   | 0.697   | 0.115 | 0.440 | 0.083 | 0.025 | 5   | 0.820 | 0.373 |
| A.MG/A.Sand vs A.CR/A.RF       | <i>Scarus hypselopterus</i>   | 0.061   | 0.697   | 0.100 | 0.609 | 0.094 | 0.065 | 10  | 0.859 | 0.212 |
| A.MG/A.Sand vs A.CR/A.RF       | <i>Scarus niger</i>           | 0.058   | 0.697   | 0.042 | 1.390 | 0.154 | 0.189 | 8   | 0.894 | 0.819 |
| A.MG/A.Sand vs A.CR/A.RF       | <i>Scarus prasiognathos</i>   | 0.008   | 0.697   | 0.025 | 0.301 | 0.000 | 0.015 | 17  | 0.927 | 0.116 |
| A.MG/A.Sand vs A.CR/A.RF       | <i>Scarus psitticus</i>       | 0.038   | 0.697   | 0.049 | 0.762 | 0.029 | 0.061 | 3   | 0.955 | 0.043 |
| A.MG/A.Sand vs A.CR/A.RF       | <i>Scarus rivulatus</i>       | 0.042   | 0.697   | 0.083 | 0.509 | 0.067 | 0.025 | 4   | 0.975 | 0.509 |
| A.MG/A.Sand vs A.CR/A.RF       | <i>Scarus schlegeli</i>       | 0.023   | 0.697   | 0.042 | 0.547 | 0.023 | 0.028 | 2   | 0.989 | 0.077 |
| A.MG/A.Sand vs A.CR/A.RF       | <i>Scarus sp.</i>             | 0.042   | 0.697   | 0.061 | 0.683 | 0.069 | 0.030 | 14  | 1.000 | 0.846 |
| A.MG/A.Sand vs A.CR/A.RF       | <i>Scarus tricolor</i>        | 0.045   | 0.697   | 0.046 | 0.986 | 0.028 | 0.082 | 6   | 1.000 | 0.365 |
| Comparison                     | species                       | average | overall | sd    | ratio | ava   | avb   | ord | cusum | p     |
| Rub/EAM vs Coral/A.MA          | <i>Chlorurus bleekeri</i>     | 0.046   | 0.561   | 0.035 | 1.313 | 0.188 | 0.213 | 13  | 0.123 | 0.954 |
| Rub/EAM vs Coral/A.MA          | <i>Chlorurus bowersi</i>      | 0.050   | 0.561   | 0.053 | 0.943 | 0.098 | 0.016 | 18  | 0.243 | 0.001 |
| Rub/EAM vs Coral/A.MA          | <i>Chlorurus microrhinos</i>  | 0.000   | 0.561   | 0.000 | NA    | 0.000 | 0.000 | 9   | 0.347 | 1     |
| Rub/EAM vs Coral/A.MA          | <i>Chlorurus sp.</i>          | 0.000   | 0.561   | 0.000 | NA    | 0.000 | 0.000 | 12  | 0.442 | 1     |
| Rub/EAM vs Coral/A.MA          | <i>Chlorurus spilurus</i>     | 0.037   | 0.561   | 0.043 | 0.866 | 0.057 | 0.038 | 8   | 0.536 | 0.317 |
| Rub/EAM vs Coral/A.MA          | <i>Hipposcarus longiceps</i>  | 0.007   | 0.561   | 0.026 | 0.258 | 0.000 | 0.013 | 2   | 0.625 | 0.31  |
| Rub/EAM vs Coral/A.MA          | <i>Scarus chameleon</i>       | 0.011   | 0.561   | 0.026 | 0.426 | 0.022 | 0.000 | 1   | 0.706 | 0.917 |

| Rub/EAM vs Coral/A.MA      | <i>Scarus dimidiatus</i>      | 0.053   | 0.561   | 0.038 | 1.401 | 0.082 | 0.143 | 5   | 0.773 | 0.095 |
|----------------------------|-------------------------------|---------|---------|-------|-------|-------|-------|-----|-------|-------|
| Rub/EAM vs Coral/A.MA      | <i>Scarus flavipectoralis</i> | 0.059   | 0.561   | 0.043 | 1.375 | 0.131 | 0.071 | 10  | 0.833 | 0.714 |
| Rub/EAM vs Coral/A.MA      | <i>Scarus forsteni</i>        | 0.034   | 0.561   | 0.043 | 0.789 | 0.065 | 0.010 | 19  | 0.885 | 0.189 |
| Rub/EAM vs Coral/A.MA      | <i>Scarus ghobban</i>         | 0.019   | 0.561   | 0.034 | 0.558 | 0.020 | 0.024 | 11  | 0.919 | 0.997 |
| Rub/EAM vs Coral/A.MA      | <i>Scarus hypselopterus</i>   | 0.053   | 0.561   | 0.033 | 1.588 | 0.107 | 0.011 | 16  | 0.950 | 0.258 |
| Rub/EAM vs Coral/A.MA      | <i>Scarus niger</i>           | 0.069   | 0.561   | 0.050 | 1.377 | 0.151 | 0.250 | 7   | 0.969 | 0.188 |
| Rub/EAM vs Coral/A.MA      | <i>Scarus prasiognathos</i>   | 0.000   | 0.561   | 0.000 | NA    | 0.000 | 0.000 | 6   | 0.981 | 1     |
| Rub/EAM vs Coral/A.MA      | <i>Scarus psitticus</i>       | 0.005   | 0.561   | 0.016 | 0.288 | 0.009 | 0.000 | 17  | 0.992 | 0.996 |
| Rub/EAM vs Coral/A.MA      | <i>Scarus rivulatus</i>       | 0.017   | 0.561   | 0.039 | 0.448 | 0.010 | 0.027 | 15  | 1.000 | 0.996 |
| Rub/EAM vs Coral/A.MA      | <i>Scarus schlegeli</i>       | 0.006   | 0.561   | 0.033 | 0.179 | 0.000 | 0.012 | 3   | 1.000 | 0.782 |
| Rub/EAM vs Coral/A.MA      | <i>Scarus sp.</i>             | 0.067   | 0.561   | 0.054 | 1.254 | 0.021 | 0.141 | 4   | 1.000 | 0.03  |
| Rub/EAM vs Coral/A.MA      | <i>Scarus tricolor</i>        | 0.029   | 0.561   | 0.037 | 0.783 | 0.040 | 0.032 | 14  | 1.000 | 0.963 |
| Comparison                 | species                       | average | overall | sd    | ratio | ava   | avb   | ord | cusum | p     |
| Rub/EAM vs A.SG/Soft Coral | <i>Chlorurus bleekeri</i>     | 0.053   | 0.604   | 0.044 | 1.217 | 0.188 | 0.125 | 13  | 0.104 | 0.622 |
| Rub/EAM vs A.SG/Soft Coral | <i>Chlorurus bowersi</i>      | 0.050   | 0.604   | 0.052 | 0.952 | 0.098 | 0.015 | 9   | 0.199 | 0.001 |
| Rub/EAM vs A.SG/Soft Coral | <i>Chlorurus microrhinos</i>  | 0.000   | 0.604   | 0.000 | NA    | 0.000 | 0.000 | 1   | 0.288 | 1     |
| Rub/EAM vs A.SG/Soft Coral | <i>Chlorurus sp.</i>          | 0.012   | 0.604   | 0.039 | 0.309 | 0.000 | 0.024 | 11  | 0.375 | 0.43  |
| Rub/EAM vs A.SG/Soft Coral | <i>Chlorurus spilurus</i>     | 0.034   | 0.604   | 0.039 | 0.890 | 0.057 | 0.032 | 2   | 0.457 | 0.493 |
| Rub/EAM vs A.SG/Soft Coral | <i>Hipposcarus longiceps</i>  | 0.000   | 0.604   | 0.000 | NA    | 0.000 | 0.000 | 19  | 0.539 | 1     |
| Rub/EAM vs A.SG/Soft Coral | <i>Scarus chameleon</i>       | 0.018   | 0.604   | 0.043 | 0.409 | 0.022 | 0.015 | 16  | 0.617 | 0.712 |
| Rub/EAM vs A.SG/Soft Coral | <i>Scarus dimidiatus</i>      | 0.037   | 0.604   | 0.028 | 1.320 | 0.082 | 0.056 | 12  | 0.693 | 0.969 |
| Rub/EAM vs A.SG/Soft Coral | <i>Scarus flavipectoralis</i> | 0.058   | 0.604   | 0.043 | 1.345 | 0.131 | 0.150 | 10  | 0.758 | 0.759 |
| Rub/EAM vs A.SG/Soft Coral | <i>Scarus forsteni</i>        | 0.040   | 0.604   | 0.048 | 0.825 | 0.065 | 0.031 | 8   | 0.819 | 0.08  |
| Rub/EAM vs A.SG/Soft Coral | <i>Scarus ghobban</i>         | 0.053   | 0.604   | 0.058 | 0.909 | 0.020 | 0.104 | 5   | 0.876 | 0.349 |
| Rub/EAM vs A.SG/Soft Coral | <i>Scarus hypselopterus</i>   | 0.046   | 0.604   | 0.033 | 1.376 | 0.107 | 0.078 | 15  | 0.919 | 0.405 |
| Rub/EAM vs A.SG/Soft Coral | <i>Scarus niger</i>           | 0.063   | 0.604   | 0.048 | 1.311 | 0.151 | 0.116 | 18  | 0.951 | 0.551 |
| Rub/EAM vs A.SG/Soft Coral | <i>Scarus prasiognathos</i>   | 0.000   | 0.604   | 0.000 | NA    | 0.000 | 0.000 | 7   | 0.980 | 1     |
| Rub/EAM vs A.SG/Soft Coral | <i>Scarus psitticus</i>       | 0.025   | 0.604   | 0.041 | 0.615 | 0.009 | 0.046 | 4   | 1.000 | 0.365 |
| Rub/EAM vs A.SG/Soft Coral | <i>Scarus rivulatus</i>       | 0.047   | 0.604   | 0.056 | 0.846 | 0.010 | 0.093 | 3   | 1.000 | 0.337 |
| Rub/EAM vs A.SG/Soft Coral | <i>Scarus schlegeli</i>       | 0.000   | 0.604   | 0.000 | NA    | 0.000 | 0.000 | 6   | 1.000 | 1     |
| Rub/EAM vs A.SG/Soft Coral | <i>Scarus sp.</i>             | 0.019   | 0.604   | 0.040 | 0.479 | 0.021 | 0.022 | 14  | 1.000 | 1     |

| Rub/EAM vs A.SG/Soft Coral    | <i>Scarus tricolor</i>        | 0.050   | 0.604   | 0.052 | 0.953 | 0.040 | 0.092 | 17  | 1.000 | 0.161 |
|-------------------------------|-------------------------------|---------|---------|-------|-------|-------|-------|-----|-------|-------|
| Comparison                    | species                       | average | overall | sd    | ratio | ava   | avb   | ord | cusum | p     |
| Rub/EAM vs A.CR/A.RF          | <i>Chlorurus bleekeri</i>     | 0.040   | 0.562   | 0.033 | 1.199 | 0.188 | 0.181 | 9   | 0.103 | 0.983 |
| Rub/EAM vs A.CR/A.RF          | <i>Chlorurus bowersi</i>      | 0.049   | 0.562   | 0.055 | 0.895 | 0.098 | 0.000 | 13  | 0.202 | 0.001 |
| Rub/EAM vs A.CR/A.RF          | <i>Chlorurus microrhinos</i>  | 0.020   | 0.562   | 0.047 | 0.424 | 0.000 | 0.040 | 2   | 0.289 | 0.013 |
| Rub/EAM vs A.CR/A.RF          | <i>Chlorurus sp.</i>          | 0.000   | 0.562   | 0.000 | NA    | 0.000 | 0.000 | 12  | 0.373 | 1     |
| Rub/EAM vs A.CR/A.RF          | <i>Chlorurus spilurus</i>     | 0.035   | 0.562   | 0.035 | 0.985 | 0.057 | 0.044 | 19  | 0.449 | 0.494 |
| Rub/EAM vs A.CR/A.RF          | <i>Hipposcarus longiceps</i>  | 0.000   | 0.562   | 0.000 | NA    | 0.000 | 0.000 | 1   | 0.519 | 1     |
| Rub/EAM vs A.CR/A.RF          | <i>Scarus chameleon</i>       | 0.030   | 0.562   | 0.037 | 0.800 | 0.022 | 0.052 | 8   | 0.586 | 0.337 |
| Rub/EAM vs A.CR/A.RF          | <i>Scarus dimidiatus</i>      | 0.037   | 0.562   | 0.028 | 1.332 | 0.082 | 0.048 | 10  | 0.651 | 0.906 |
| Rub/EAM vs A.CR/A.RF          | <i>Scarus flavipectoralis</i> | 0.058   | 0.562   | 0.044 | 1.323 | 0.131 | 0.085 | 5   | 0.712 | 0.685 |
| Rub/EAM vs A.CR/A.RF          | <i>Scarus forsteni</i>        | 0.037   | 0.562   | 0.043 | 0.856 | 0.065 | 0.027 | 15  | 0.770 | 0.186 |
| Rub/EAM vs A.CR/A.RF          | <i>Scarus ghobban</i>         | 0.019   | 0.562   | 0.032 | 0.607 | 0.020 | 0.025 | 7   | 0.823 | 0.976 |
| Rub/EAM vs A.CR/A.RF          | <i>Scarus hypselopterus</i>   | 0.047   | 0.562   | 0.033 | 1.445 | 0.107 | 0.065 | 18  | 0.862 | 0.305 |
| Rub/EAM vs A.CR/A.RF          | <i>Scarus niger</i>           | 0.056   | 0.562   | 0.041 | 1.348 | 0.151 | 0.189 | 3   | 0.897 | 0.843 |
| Rub/EAM vs A.CR/A.RF          | <i>Scarus prasiognathos</i>   | 0.008   | 0.562   | 0.025 | 0.301 | 0.000 | 0.015 | 11  | 0.932 | 0.116 |
| Rub/EAM vs A.CR/A.RF          | <i>Scarus psitticus</i>       | 0.032   | 0.562   | 0.047 | 0.682 | 0.009 | 0.061 | 16  | 0.961 | 0.167 |
| Rub/EAM vs A.CR/A.RF          | <i>Scarus rivulatus</i>       | 0.017   | 0.562   | 0.043 | 0.388 | 0.010 | 0.025 | 17  | 0.986 | 0.961 |
| Rub/EAM vs A.CR/A.RF          | <i>Scarus schlegeli</i>       | 0.014   | 0.562   | 0.032 | 0.445 | 0.000 | 0.028 | 14  | 1.000 | 0.38  |
| Rub/EAM vs A.CR/A.RF          | <i>Scarus sp.</i>             | 0.022   | 0.562   | 0.036 | 0.600 | 0.021 | 0.030 | 4   | 1.000 | 0.994 |
| Rub/EAM vs A.CR/A.RF          | <i>Scarus tricolor</i>        | 0.042   | 0.562   | 0.040 | 1.060 | 0.040 | 0.082 | 6   | 1.000 | 0.502 |
| Comparison                    | species                       | average | overall | sd    | ratio | ava   | avb   | ord | cusum | p     |
| Coral.A.MA vs A.SG/Soft Coral | <i>Chlorurus bleekeri</i>     | 0.059   | 0.644   | 0.043 | 1.368 | 0.213 | 0.125 | 13  | 0.120 | 0.12  |
| Coral.A.MA vs A.SG/Soft Coral | <i>Chlorurus bowersi</i>      | 0.014   | 0.644   | 0.030 | 0.471 | 0.016 | 0.015 | 18  | 0.230 | 0.961 |
| Coral.A.MA vs A.SG/Soft Coral | <i>Chlorurus microrhinos</i>  | 0.000   | 0.644   | 0.000 | NA    | 0.000 | 0.000 | 9   | 0.331 | 1     |
| Coral.A.MA vs A.SG/Soft Coral | <i>Chlorurus sp.</i>          | 0.012   | 0.644   | 0.039 | 0.310 | 0.000 | 0.024 | 1   | 0.423 | 0.454 |
| Coral.A.MA vs A.SG/Soft Coral | <i>Chlorurus spilurus</i>     | 0.029   | 0.644   | 0.046 | 0.647 | 0.038 | 0.032 | 8   | 0.514 | 0.856 |
| Coral.A.MA vs A.SG/Soft Coral | <i>Hipposcarus longiceps</i>  | 0.007   | 0.644   | 0.026 | 0.258 | 0.013 | 0.000 | 11  | 0.598 | 0.328 |
| Coral.A.MA vs A.SG/Soft Coral | <i>Scarus chameleon</i>       | 0.007   | 0.644   | 0.039 | 0.192 | 0.000 | 0.015 | 16  | 0.676 | 0.993 |
| Coral.A.MA vs A.SG/Soft Coral | <i>Scarus dimidiatus</i>      | 0.059   | 0.644   | 0.043 | 1.375 | 0.143 | 0.056 | 19  | 0.754 | 0.001 |
| Coral.A.MA vs A.SG/Soft Coral | <i>Scarus flavipectoralis</i> | 0.065   | 0.644   | 0.050 | 1.319 | 0.071 | 0.150 | 12  | 0.817 | 0.59  |

| Coral.A.MA vs A.SG/Soft Coral | <i>Scarus forsteni</i>        | 0.019   | 0.644   | 0.043 | 0.444 | 0.010 | 0.031 | 5   | 0.862 | 0.869 |
|-------------------------------|-------------------------------|---------|---------|-------|-------|-------|-------|-----|-------|-------|
| Coral.A.MA vs A.SG/Soft Coral | <i>Scarus ghobban</i>         | 0.054   | 0.644   | 0.059 | 0.905 | 0.024 | 0.104 | 15  | 0.898 | 0.32  |
| Coral.A.MA vs A.SG/Soft Coral | <i>Scarus hypselopterus</i>   | 0.041   | 0.644   | 0.043 | 0.933 | 0.011 | 0.078 | 10  | 0.928 | 0.685 |
| Coral.A.MA vs A.SG/Soft Coral | <i>Scarus niger</i>           | 0.077   | 0.644   | 0.054 | 1.430 | 0.250 | 0.116 | 2   | 0.950 | 0.001 |
| Coral.A.MA vs A.SG/Soft Coral | <i>Scarus prasiognathos</i>   | 0.000   | 0.644   | 0.000 | NA    | 0.000 | 0.000 | 4   | 0.969 | 1     |
| Coral.A.MA vs A.SG/Soft Coral | <i>Scarus psitticus</i>       | 0.023   | 0.644   | 0.042 | 0.552 | 0.000 | 0.046 | 7   | 0.980 | 0.495 |
| Coral.A.MA vs A.SG/Soft Coral | <i>Scarus rivulatus</i>       | 0.051   | 0.644   | 0.057 | 0.888 | 0.027 | 0.093 | 6   | 0.991 | 0.147 |
| Coral.A.MA vs A.SG/Soft Coral | <i>Scarus schlegeli</i>       | 0.006   | 0.644   | 0.033 | 0.180 | 0.012 | 0.000 | 17  | 1.000 | 0.881 |
| Coral.A.MA vs A.SG/Soft Coral | <i>Scarus sp.</i>             | 0.071   | 0.644   | 0.056 | 1.264 | 0.141 | 0.022 | 3   | 1.000 | 0.001 |
| Coral.A.MA vs A.SG/Soft Coral | <i>Scarus tricolor</i>        | 0.050   | 0.644   | 0.056 | 0.888 | 0.032 | 0.092 | 14  | 1.000 | 0.037 |
| Comparison                    | species                       | average | overall | sd    | ratio | ava   | avb   | ord | cusum | p     |
| Coral/A.MA vs A.CR/A.RF       | <i>Chlorurus bleekeri</i>     | 0.040   | 0.561   | 0.030 | 1.340 | 0.213 | 0.181 | 18  | 0.120 | 0.994 |
| Coral/A.MA vs A.CR/A.RF       | <i>Chlorurus bowersi</i>      | 0.008   | 0.561   | 0.024 | 0.320 | 0.016 | 0.000 | 8   | 0.227 | 0.976 |
| Coral/A.MA vs A.CR/A.RF       | <i>Chlorurus microrhinos</i>  | 0.020   | 0.561   | 0.047 | 0.424 | 0.000 | 0.040 | 9   | 0.319 | 0.013 |
| Coral/A.MA vs A.CR/A.RF       | <i>Chlorurus sp.</i>          | 0.000   | 0.561   | 0.000 | NA    | 0.000 | 0.000 | 13  | 0.407 | 1     |
| Coral/A.MA vs A.CR/A.RF       | <i>Chlorurus spilurus</i>     | 0.033   | 0.561   | 0.042 | 0.791 | 0.038 | 0.044 | 19  | 0.486 | 0.548 |
| Coral/A.MA vs A.CR/A.RF       | <i>Hipposcarus longiceps</i>  | 0.007   | 0.561   | 0.026 | 0.258 | 0.013 | 0.000 | 1   | 0.558 | 0.31  |
| Coral/A.MA vs A.CR/A.RF       | <i>Scarus chameleon</i>       | 0.026   | 0.561   | 0.037 | 0.704 | 0.000 | 0.052 | 12  | 0.619 | 0.474 |
| Coral/A.MA vs A.CR/A.RF       | <i>Scarus dimidiatus</i>      | 0.060   | 0.561   | 0.044 | 1.367 | 0.143 | 0.048 | 5   | 0.678 | 0.015 |
| Coral/A.MA vs A.CR/A.RF       | <i>Scarus flavipectoralis</i> | 0.051   | 0.561   | 0.047 | 1.089 | 0.071 | 0.085 | 15  | 0.733 | 0.967 |
| Coral/A.MA vs A.CR/A.RF       | <i>Scarus forsteni</i>        | 0.017   | 0.561   | 0.033 | 0.514 | 0.010 | 0.027 | 7   | 0.780 | 0.798 |
| Coral/A.MA vs A.CR/A.RF       | <i>Scarus ghobban</i>         | 0.021   | 0.561   | 0.037 | 0.575 | 0.024 | 0.025 | 16  | 0.823 | 0.979 |
| Coral/A.MA vs A.CR/A.RF       | <i>Scarus hypselopterus</i>   | 0.035   | 0.561   | 0.043 | 0.811 | 0.011 | 0.065 | 11  | 0.861 | 0.866 |
| Coral/A.MA vs A.CR/A.RF       | <i>Scarus niger</i>           | 0.050   | 0.561   | 0.037 | 1.343 | 0.250 | 0.189 | 3   | 0.896 | 0.987 |
| Coral/A.MA vs A.CR/A.RF       | <i>Scarus prasiognathos</i>   | 0.008   | 0.561   | 0.025 | 0.301 | 0.000 | 0.015 | 17  | 0.931 | 0.116 |
| Coral/A.MA vs A.CR/A.RF       | <i>Scarus psitticus</i>       | 0.031   | 0.561   | 0.048 | 0.637 | 0.000 | 0.061 | 10  | 0.961 | 0.157 |
| Coral/A.MA vs A.CR/A.RF       | <i>Scarus rivulatus</i>       | 0.024   | 0.561   | 0.051 | 0.470 | 0.027 | 0.025 | 2   | 0.974 | 0.96  |
| Coral/A.MA vs A.CR/A.RF       | <i>Scarus schlegeli</i>       | 0.019   | 0.561   | 0.043 | 0.451 | 0.012 | 0.028 | 14  | 0.988 | 0.121 |
| Coral/A.MA vs A.CR/A.RF       | <i>Scarus sp.</i>             | 0.067   | 0.561   | 0.054 | 1.238 | 0.141 | 0.030 | 6   | 1.000 | 0.032 |
| Coral/A.MA vs A.CR/A.RF       | <i>Scarus tricolor</i>        | 0.044   | 0.561   | 0.044 | 1.008 | 0.032 | 0.082 | 4   | 1.000 | 0.374 |
| Comparison                    | species                       | average | overall | sd    | ratio | ava   | avb   | ord | cusum | p     |

|                              |                               |       |       |       |       |       |       |    |       |       |
|------------------------------|-------------------------------|-------|-------|-------|-------|-------|-------|----|-------|-------|
| A.SG/Soft Coral vs A.CR/A.RF | <i>Chlorurus bleekeri</i>     | 0.048 | 0.625 | 0.037 | 1.292 | 0.125 | 0.181 | 9  | 0.103 | 0.885 |
| A.SG/Soft Coral vs A.CR/A.RF | <i>Chlorurus bowersi</i>      | 0.008 | 0.625 | 0.022 | 0.345 | 0.015 | 0.000 | 13 | 0.200 | 0.979 |
| A.SG/Soft Coral vs A.CR/A.RF | <i>Chlorurus microrhinos</i>  | 0.020 | 0.625 | 0.047 | 0.424 | 0.000 | 0.040 | 19 | 0.289 | 0.013 |
| A.SG/Soft Coral vs A.CR/A.RF | <i>Chlorurus sp.</i>          | 0.012 | 0.625 | 0.039 | 0.309 | 0.024 | 0.000 | 11 | 0.374 | 0.431 |
| A.SG/Soft Coral vs A.CR/A.RF | <i>Chlorurus spilurus</i>     | 0.030 | 0.625 | 0.036 | 0.820 | 0.032 | 0.044 | 16 | 0.457 | 0.721 |
| A.SG/Soft Coral vs A.CR/A.RF | <i>Hipposcarus longiceps</i>  | 0.000 | 0.625 | 0.000 | NA    | 0.000 | 0.000 | 1  | 0.534 | 1     |
| A.SG/Soft Coral vs A.CR/A.RF | <i>Scarus chameleon</i>       | 0.032 | 0.625 | 0.047 | 0.673 | 0.015 | 0.052 | 12 | 0.606 | 0.341 |
| A.SG/Soft Coral vs A.CR/A.RF | <i>Scarus dimidiatus</i>      | 0.033 | 0.625 | 0.030 | 1.096 | 0.056 | 0.048 | 15 | 0.673 | 0.995 |
| A.SG/Soft Coral vs A.CR/A.RF | <i>Scarus flavipectoralis</i> | 0.064 | 0.625 | 0.049 | 1.309 | 0.150 | 0.085 | 8  | 0.725 | 0.433 |
| A.SG/Soft Coral vs A.CR/A.RF | <i>Scarus forsteni</i>        | 0.026 | 0.625 | 0.045 | 0.569 | 0.031 | 0.027 | 7  | 0.776 | 0.475 |
| A.SG/Soft Coral vs A.CR/A.RF | <i>Scarus ghobban</i>         | 0.053 | 0.625 | 0.058 | 0.920 | 0.104 | 0.025 | 5  | 0.824 | 0.317 |
| A.SG/Soft Coral vs A.CR/A.RF | <i>Scarus hypselopterus</i>   | 0.046 | 0.625 | 0.041 | 1.122 | 0.078 | 0.065 | 10 | 0.864 | 0.425 |
| A.SG/Soft Coral vs A.CR/A.RF | <i>Scarus niger</i>           | 0.061 | 0.625 | 0.042 | 1.443 | 0.116 | 0.189 | 18 | 0.902 | 0.678 |
| A.SG/Soft Coral vs A.CR/A.RF | <i>Scarus prasiognathos</i>   | 0.008 | 0.625 | 0.025 | 0.301 | 0.000 | 0.015 | 3  | 0.934 | 0.116 |
| A.SG/Soft Coral vs A.CR/A.RF | <i>Scarus psitticus</i>       | 0.041 | 0.625 | 0.049 | 0.839 | 0.046 | 0.061 | 17 | 0.956 | 0.012 |
| A.SG/Soft Coral vs A.CR/A.RF | <i>Scarus rivulatus</i>       | 0.052 | 0.625 | 0.059 | 0.877 | 0.093 | 0.025 | 4  | 0.975 | 0.225 |
| A.SG/Soft Coral vs A.CR/A.RF | <i>Scarus schlegeli</i>       | 0.014 | 0.625 | 0.032 | 0.445 | 0.000 | 0.028 | 2  | 0.988 | 0.307 |
| A.SG/Soft Coral vs A.CR/A.RF | <i>Scarus sp.</i>             | 0.023 | 0.625 | 0.045 | 0.517 | 0.022 | 0.030 | 14 | 1.000 | 0.999 |
| A.SG/Soft Coral vs A.CR/A.RF | <i>Scarus tricolor</i>        | 0.056 | 0.625 | 0.049 | 1.130 | 0.092 | 0.082 | 6  | 1.000 | 0.037 |



C. SIMPER analysis output for wrasses.

| Comparison             | species                           | average | overall | sd    | ratio | ava   | avb   | ord | cusum | p     |
|------------------------|-----------------------------------|---------|---------|-------|-------|-------|-------|-----|-------|-------|
| A.MG/A.Sand vs Rub/EAM | <i>Anampses caeruleopunctatus</i> | 0.000   | 0.851   | 0.000 | NA    | 0.000 | 0.000 | 41  | 0.078 | 1     |
| A.MG/A.Sand vs Rub/EAM | <i>Anampses meleagrides</i>       | 0.000   | 0.851   | 0.000 | NA    | 0.000 | 0.000 | 52  | 0.148 | 1     |
| A.MG/A.Sand vs Rub/EAM | <i>Anampses sp.</i>               | 0.012   | 0.851   | 0.031 | 0.398 | 0.015 | 0.010 | 50  | 0.209 | 0.952 |
| A.MG/A.Sand vs Rub/EAM | <i>Anampses twistii</i>           | 0.018   | 0.851   | 0.050 | 0.353 | 0.014 | 0.023 | 14  | 0.268 | 0.324 |
| A.MG/A.Sand vs Rub/EAM | <i>Bodianus dictynna</i>          | 0.037   | 0.851   | 0.086 | 0.426 | 0.000 | 0.074 | 12  | 0.326 | 0.016 |
| A.MG/A.Sand vs Rub/EAM | <i>Bodianus mesothorax</i>        | 0.045   | 0.851   | 0.067 | 0.678 | 0.016 | 0.084 | 16  | 0.382 | 0.29  |
| A.MG/A.Sand vs Rub/EAM | <i>Bodianus sp.</i>               | 0.000   | 0.851   | 0.000 | NA    | 0.000 | 0.000 | 21  | 0.437 | 1     |
| A.MG/A.Sand vs Rub/EAM | <i>Cheilinus chlorourus</i>       | 0.026   | 0.851   | 0.057 | 0.449 | 0.026 | 0.030 | 6   | 0.490 | 0.474 |
| A.MG/A.Sand vs Rub/EAM | <i>Cheilinus fasciatus</i>        | 0.033   | 0.851   | 0.079 | 0.421 | 0.025 | 0.046 | 11  | 0.540 | 0.094 |
| A.MG/A.Sand vs Rub/EAM | <i>Cheilinus oxycephalus</i>      | 0.002   | 0.851   | 0.012 | 0.192 | 0.004 | 0.000 | 15  | 0.587 | 0.969 |
| A.MG/A.Sand vs Rub/EAM | <i>Cheilinus trilobatus</i>       | 0.042   | 0.851   | 0.064 | 0.658 | 0.079 | 0.012 | 5   | 0.631 | 0.349 |
| A.MG/A.Sand vs Rub/EAM | <i>Cheilio inermis</i>            | 0.049   | 0.851   | 0.074 | 0.663 | 0.075 | 0.035 | 9   | 0.670 | 0.026 |
| A.MG/A.Sand vs Rub/EAM | <i>Choerodon anchorago</i>        | 0.000   | 0.851   | 0.000 | NA    | 0.000 | 0.000 | 28  | 0.701 | 1     |
| A.MG/A.Sand vs Rub/EAM | <i>Choerodon sp.</i>              | 0.050   | 0.851   | 0.064 | 0.784 | 0.100 | 0.000 | 45  | 0.732 | 0.01  |
| A.MG/A.Sand vs Rub/EAM | <i>Coris batuensis</i>            | 0.041   | 0.851   | 0.057 | 0.711 | 0.081 | 0.000 | 8   | 0.762 | 0.368 |
| A.MG/A.Sand vs Rub/EAM | <i>Coris gaimard</i>              | 0.048   | 0.851   | 0.074 | 0.653 | 0.007 | 0.094 | 19  | 0.789 | 0.021 |
| A.MG/A.Sand vs Rub/EAM | <i>Epibulus brevis</i>            | 0.012   | 0.851   | 0.043 | 0.272 | 0.023 | 0.000 | 37  | 0.813 | 0.463 |
| A.MG/A.Sand vs Rub/EAM | <i>Epibulus insidiator</i>        | 0.000   | 0.851   | 0.000 | NA    | 0.000 | 0.000 | 27  | 0.836 | 1     |
| A.MG/A.Sand vs Rub/EAM | <i>Gomphosus varius</i>           | 0.023   | 0.851   | 0.055 | 0.419 | 0.000 | 0.046 | 26  | 0.857 | 0.102 |
| A.MG/A.Sand vs Rub/EAM | <i>Halichoeres chrysus</i>        | 0.000   | 0.851   | 0.000 | NA    | 0.000 | 0.000 | 4   | 0.878 | 1     |
| A.MG/A.Sand vs Rub/EAM | <i>Halichoeres hortulanus</i>     | 0.046   | 0.851   | 0.064 | 0.723 | 0.031 | 0.078 | 39  | 0.896 | 0.111 |
| A.MG/A.Sand vs Rub/EAM | <i>Halichoeres marginatus</i>     | 0.000   | 0.851   | 0.000 | NA    | 0.000 | 0.000 | 25  | 0.911 | 1     |
| A.MG/A.Sand vs Rub/EAM | <i>Halichoeres melanurus</i>      | 0.008   | 0.851   | 0.023 | 0.338 | 0.016 | 0.000 | 3   | 0.926 | 0.534 |
| A.MG/A.Sand vs Rub/EAM | <i>Halichoeres nigrescens</i>     | 0.000   | 0.851   | 0.000 | NA    | 0.000 | 0.000 | 17  | 0.939 | 1     |
| A.MG/A.Sand vs Rub/EAM | <i>Halichoeres podostigma</i>     | 0.013   | 0.851   | 0.033 | 0.399 | 0.027 | 0.000 | 47  | 0.950 | 0.362 |

|                           |                                     |         |         |       |       |       |       |     |       |       |
|---------------------------|-------------------------------------|---------|---------|-------|-------|-------|-------|-----|-------|-------|
| A.MG/A.Sand vs Rub/EAM    | <i>Halichoeres prosopeion</i>       | 0.018   | 0.851   | 0.040 | 0.450 | 0.024 | 0.015 | 23  | 0.959 | 0.402 |
| A.MG/A.Sand vs Rub/EAM    | <i>Halichoeres richmondi</i>        | 0.020   | 0.851   | 0.048 | 0.407 | 0.021 | 0.022 | 36  | 0.967 | 0.143 |
| A.MG/A.Sand vs Rub/EAM    | <i>Halichoeres scapularis</i>       | 0.027   | 0.851   | 0.049 | 0.552 | 0.054 | 0.000 | 40  | 0.976 | 0.653 |
| A.MG/A.Sand vs Rub/EAM    | <i>Halichoeres sp.</i>              | 0.000   | 0.851   | 0.000 | NA    | 0.000 | 0.000 | 30  | 0.983 | 1     |
| A.MG/A.Sand vs Rub/EAM    | <i>Hemigymnus fasciatus</i>         | 0.006   | 0.851   | 0.020 | 0.301 | 0.000 | 0.012 | 38  | 0.987 | 0.945 |
| A.MG/A.Sand vs Rub/EAM    | <i>Hemigymnus melapterus</i>        | 0.000   | 0.851   | 0.000 | NA    | 0.000 | 0.000 | 34  | 0.991 | 1     |
| A.MG/A.Sand vs Rub/EAM    | <i>Hologymnosus annulatus</i>       | 0.003   | 0.851   | 0.016 | 0.192 | 0.006 | 0.000 | 32  | 0.995 | 0.37  |
| A.MG/A.Sand vs Rub/EAM    | <i>Hologymnosus sp.</i>             | 0.002   | 0.851   | 0.012 | 0.192 | 0.005 | 0.000 | 33  | 0.997 | 0.774 |
| A.MG/A.Sand vs Rub/EAM    | <i>Labrichthys unilineatus</i>      | 0.003   | 0.851   | 0.018 | 0.192 | 0.007 | 0.000 | 10  | 1.000 | 0.998 |
| A.MG/A.Sand vs Rub/EAM    | <i>Labropsis manabei</i>            | 0.000   | 0.851   | 0.000 | NA    | 0.000 | 0.000 | 1   | 1.000 | 1     |
| A.MG/A.Sand vs Rub/EAM    | <i>Labropsis xanthonota</i>         | 0.007   | 0.851   | 0.026 | 0.276 | 0.014 | 0.000 | 2   | 1.000 | 0.283 |
| A.MG/A.Sand vs Rub/EAM    | <i>Macropharyngodon meleagris</i>   | 0.020   | 0.851   | 0.052 | 0.393 | 0.013 | 0.030 | 7   | 1.000 | 0.798 |
| A.MG/A.Sand vs Rub/EAM    | <i>Macropharyngodon negrosensis</i> | 0.004   | 0.851   | 0.019 | 0.192 | 0.007 | 0.000 | 13  | 1.000 | 0.469 |
| A.MG/A.Sand vs Rub/EAM    | <i>Novaculichthys taeniourus</i>    | 0.015   | 0.851   | 0.034 | 0.446 | 0.020 | 0.012 | 18  | 1.000 | 0.474 |
| A.MG/A.Sand vs Rub/EAM    | <i>Oxycheilinus celebicus</i>       | 0.007   | 0.851   | 0.025 | 0.277 | 0.014 | 0.000 | 20  | 1.000 | 0.549 |
| A.MG/A.Sand vs Rub/EAM    | <i>Oxycheilinus digramma</i>        | 0.066   | 0.851   | 0.065 | 1.023 | 0.116 | 0.047 | 22  | 1.000 | 0.308 |
| A.MG/A.Sand vs Rub/EAM    | <i>Oxycheilinus sp.</i>             | 0.000   | 0.851   | 0.000 | NA    | 0.000 | 0.000 | 24  | 1.000 | 1     |
| A.MG/A.Sand vs Rub/EAM    | <i>Oxycheilinus unifasciatus</i>    | 0.000   | 0.851   | 0.000 | NA    | 0.000 | 0.000 | 29  | 1.000 | 1     |
| A.MG/A.Sand vs Rub/EAM    | <i>Pseudocheilinus hexataenia</i>   | 0.000   | 0.851   | 0.000 | NA    | 0.000 | 0.000 | 31  | 1.000 | 1     |
| A.MG/A.Sand vs Rub/EAM    | <i>Pseudodax moluccanus</i>         | 0.026   | 0.851   | 0.085 | 0.301 | 0.000 | 0.051 | 35  | 1.000 | 0.11  |
| A.MG/A.Sand vs Rub/EAM    | <i>Stethojulis bandanensis</i>      | 0.000   | 0.851   | 0.000 | NA    | 0.000 | 0.000 | 42  | 1.000 | 1     |
| A.MG/A.Sand vs Rub/EAM    | <i>Stethojulis interrupta</i>       | 0.009   | 0.851   | 0.032 | 0.277 | 0.018 | 0.000 | 43  | 1.000 | 0.818 |
| A.MG/A.Sand vs Rub/EAM    | <i>Stethojulis strigiventer</i>     | 0.000   | 0.851   | 0.000 | NA    | 0.000 | 0.000 | 44  | 1.000 | 1     |
| A.MG/A.Sand vs Rub/EAM    | <i>Thalassoma amblycephalum</i>     | 0.000   | 0.851   | 0.000 | NA    | 0.000 | 0.000 | 46  | 1.000 | 1     |
| A.MG/A.Sand vs Rub/EAM    | <i>Thalassoma hardwicke</i>         | 0.052   | 0.851   | 0.093 | 0.567 | 0.000 | 0.105 | 48  | 1.000 | 0.059 |
| A.MG/A.Sand vs Rub/EAM    | <i>Thalassoma jansenii</i>          | 0.000   | 0.851   | 0.000 | NA    | 0.000 | 0.000 | 49  | 1.000 | 1     |
| A.MG/A.Sand vs Rub/EAM    | <i>Thalassoma lunare</i>            | 0.059   | 0.851   | 0.039 | 1.512 | 0.141 | 0.173 | 51  | 1.000 | 0.019 |
| Comparison                | species                             | average | overall | sd    | ratio | ava   | avb   | ord | cusum | p     |
| A.MG/A.Sand vs Coral/A.MA | <i>Anampses caeruleopunctatus</i>   | 0.002   | 0.821   | 0.011 | 0.179 | 0.000 | 0.004 | 41  | 0.076 | 0.52  |
| A.MG/A.Sand vs Coral/A.MA | <i>Anampses meleagrides</i>         | 0.009   | 0.821   | 0.028 | 0.342 | 0.015 | 0.005 | 6   | 0.138 | 0.035 |
| A.MG/A.Sand vs Coral/A.MA | <i>Anampses sp.</i>                 | 0.043   | 0.821   | 0.042 | 1.047 | 0.087 | 0.000 | 50  | 0.194 | 0.001 |

|                           |                                |       |       |       |       |       |       |    |       |       |
|---------------------------|--------------------------------|-------|-------|-------|-------|-------|-------|----|-------|-------|
| A.MG/A.Sand vs Coral/A.MA | <i>Anampses twistii</i>        | 0.012 | 0.821 | 0.043 | 0.280 | 0.000 | 0.024 | 3  | 0.247 | 0.562 |
| A.MG/A.Sand vs Coral/A.MA | <i>Bodianus dictynna</i>       | 0.010 | 0.821 | 0.027 | 0.371 | 0.020 | 0.000 | 21 | 0.297 | 0.628 |
| A.MG/A.Sand vs Coral/A.MA | <i>Bodianus mesothorax</i>     | 0.051 | 0.821 | 0.041 | 1.235 | 0.014 | 0.106 | 11 | 0.344 | 0.031 |
| A.MG/A.Sand vs Coral/A.MA | <i>Bodianus sp.</i>            | 0.002 | 0.821 | 0.013 | 0.179 | 0.000 | 0.005 | 16 | 0.389 | 0.52  |
| A.MG/A.Sand vs Coral/A.MA | <i>Cheilinus chlorourus</i>    | 0.034 | 0.821 | 0.053 | 0.648 | 0.062 | 0.013 | 34 | 0.434 | 0.097 |
| A.MG/A.Sand vs Coral/A.MA | <i>Cheilinus fasciatus</i>     | 0.005 | 0.821 | 0.025 | 0.213 | 0.011 | 0.000 | 28 | 0.478 | 0.984 |
| A.MG/A.Sand vs Coral/A.MA | <i>Cheilinus oxycephalus</i>   | 0.017 | 0.821 | 0.031 | 0.543 | 0.008 | 0.029 | 52 | 0.522 | 0.039 |
| A.MG/A.Sand vs Coral/A.MA | <i>Cheilinus trilobatus</i>    | 0.039 | 0.821 | 0.046 | 0.841 | 0.077 | 0.007 | 8  | 0.563 | 0.496 |
| A.MG/A.Sand vs Coral/A.MA | <i>Cheilio inermis</i>         | 0.014 | 0.821 | 0.034 | 0.421 | 0.022 | 0.008 | 37 | 0.600 | 0.965 |
| A.MG/A.Sand vs Coral/A.MA | <i>Choerodon anchorago</i>     | 0.003 | 0.821 | 0.014 | 0.179 | 0.000 | 0.005 | 31 | 0.636 | 0.503 |
| A.MG/A.Sand vs Coral/A.MA | <i>Choerodon sp.</i>           | 0.004 | 0.821 | 0.014 | 0.308 | 0.008 | 0.000 | 15 | 0.667 | 1     |
| A.MG/A.Sand vs Coral/A.MA | <i>Coris batuensis</i>         | 0.026 | 0.821 | 0.039 | 0.673 | 0.045 | 0.014 | 30 | 0.692 | 0.975 |
| A.MG/A.Sand vs Coral/A.MA | <i>Coris gaimard</i>           | 0.037 | 0.821 | 0.048 | 0.768 | 0.071 | 0.010 | 26 | 0.713 | 0.089 |
| A.MG/A.Sand vs Coral/A.MA | <i>Epibulus brevis</i>         | 0.009 | 0.821 | 0.024 | 0.377 | 0.000 | 0.018 | 46 | 0.734 | 0.63  |
| A.MG/A.Sand vs Coral/A.MA | <i>Epibulus insidiator</i>     | 0.005 | 0.821 | 0.020 | 0.257 | 0.000 | 0.010 | 10 | 0.755 | 0.276 |
| A.MG/A.Sand vs Coral/A.MA | <i>Gomphosus varius</i>        | 0.016 | 0.821 | 0.031 | 0.521 | 0.012 | 0.024 | 47 | 0.774 | 0.336 |
| A.MG/A.Sand vs Coral/A.MA | <i>Halichoeres chrysus</i>     | 0.005 | 0.821 | 0.024 | 0.213 | 0.010 | 0.000 | 19 | 0.794 | 0.196 |
| A.MG/A.Sand vs Coral/A.MA | <i>Halichoeres hortulanus</i>  | 0.041 | 0.821 | 0.043 | 0.946 | 0.064 | 0.048 | 12 | 0.811 | 0.264 |
| A.MG/A.Sand vs Coral/A.MA | <i>Halichoeres marginatus</i>  | 0.007 | 0.821 | 0.027 | 0.256 | 0.000 | 0.014 | 4  | 0.826 | 0.247 |
| A.MG/A.Sand vs Coral/A.MA | <i>Halichoeres melanurus</i>   | 0.008 | 0.821 | 0.024 | 0.317 | 0.000 | 0.015 | 33 | 0.840 | 0.563 |
| A.MG/A.Sand vs Coral/A.MA | <i>Halichoeres nigrescens</i>  | 0.003 | 0.821 | 0.015 | 0.179 | 0.000 | 0.005 | 5  | 0.852 | 0.52  |
| A.MG/A.Sand vs Coral/A.MA | <i>Halichoeres podostigma</i>  | 0.009 | 0.821 | 0.023 | 0.382 | 0.005 | 0.013 | 2  | 0.863 | 0.74  |
| A.MG/A.Sand vs Coral/A.MA | <i>Halichoeres prosopeion</i>  | 0.017 | 0.821 | 0.042 | 0.408 | 0.015 | 0.022 | 17 | 0.874 | 0.448 |
| A.MG/A.Sand vs Coral/A.MA | <i>Halichoeres richmondi</i>   | 0.006 | 0.821 | 0.026 | 0.254 | 0.000 | 0.013 | 25 | 0.885 | 0.824 |
| A.MG/A.Sand vs Coral/A.MA | <i>Halichoeres scapularis</i>  | 0.036 | 0.821 | 0.062 | 0.583 | 0.072 | 0.000 | 39 | 0.895 | 0.232 |
| A.MG/A.Sand vs Coral/A.MA | <i>Halichoeres sp.</i>         | 0.005 | 0.821 | 0.021 | 0.258 | 0.000 | 0.011 | 23 | 0.905 | 0.248 |
| A.MG/A.Sand vs Coral/A.MA | <i>Hemigymnus fasciatus</i>    | 0.021 | 0.821 | 0.038 | 0.550 | 0.017 | 0.029 | 22 | 0.913 | 0.151 |
| A.MG/A.Sand vs Coral/A.MA | <i>Hemigymnus melapterus</i>   | 0.029 | 0.821 | 0.044 | 0.665 | 0.044 | 0.025 | 27 | 0.921 | 0.212 |
| A.MG/A.Sand vs Coral/A.MA | <i>Hologymnosus annulatus</i>  | 0.000 | 0.821 | 0.000 | NA    | 0.000 | 0.000 | 29 | 0.928 | 1     |
| A.MG/A.Sand vs Coral/A.MA | <i>Hologymnosus sp.</i>        | 0.011 | 0.821 | 0.031 | 0.369 | 0.023 | 0.000 | 9  | 0.934 | 0.036 |
| A.MG/A.Sand vs Coral/A.MA | <i>Labrichthys unilineatus</i> | 0.037 | 0.821 | 0.041 | 0.899 | 0.004 | 0.074 | 44 | 0.941 | 0.001 |

| A.MG/A.Sand vs Coral/A.MA      | <i>Labropsis manabei</i>            | 0.003   | 0.821   | 0.016 | 0.179 | 0.000 | 0.006 | 20  | 0.947 | 0.495 |
|--------------------------------|-------------------------------------|---------|---------|-------|-------|-------|-------|-----|-------|-------|
| A.MG/A.Sand vs Coral/A.MA      | <i>Labropsis xanthonota</i>         | 0.000   | 0.821   | 0.000 | NA    | 0.000 | 0.000 | 18  | 0.953 | 1     |
| A.MG/A.Sand vs Coral/A.MA      | <i>Macropharyngodon meleagris</i>   | 0.030   | 0.821   | 0.039 | 0.755 | 0.032 | 0.042 | 42  | 0.958 | 0.361 |
| A.MG/A.Sand vs Coral/A.MA      | <i>Macropharyngodon negrosensis</i> | 0.004   | 0.821   | 0.020 | 0.213 | 0.009 | 0.000 | 51  | 0.964 | 0.496 |
| A.MG/A.Sand vs Coral/A.MA      | <i>Novaculichthys taeniourus</i>    | 0.009   | 0.821   | 0.022 | 0.386 | 0.017 | 0.000 | 38  | 0.969 | 0.885 |
| A.MG/A.Sand vs Coral/A.MA      | <i>Oxycheilinus celebicus</i>       | 0.000   | 0.821   | 0.000 | NA    | 0.000 | 0.000 | 14  | 0.974 | 1     |
| A.MG/A.Sand vs Coral/A.MA      | <i>Oxycheilinus digramma</i>        | 0.063   | 0.821   | 0.045 | 1.383 | 0.060 | 0.138 | 48  | 0.979 | 0.562 |
| A.MG/A.Sand vs Coral/A.MA      | <i>Oxycheilinus sp.</i>             | 0.004   | 0.821   | 0.017 | 0.257 | 0.000 | 0.009 | 43  | 0.983 | 0.257 |
| A.MG/A.Sand vs Coral/A.MA      | <i>Oxycheilinus unifasciatus</i>    | 0.003   | 0.821   | 0.016 | 0.213 | 0.007 | 0.000 | 35  | 0.986 | 0.217 |
| A.MG/A.Sand vs Coral/A.MA      | <i>Pseudocheilinus hexataenia</i>   | 0.005   | 0.821   | 0.021 | 0.256 | 0.000 | 0.011 | 24  | 0.989 | 0.244 |
| A.MG/A.Sand vs Coral/A.MA      | <i>Pseudodax moluccanus</i>         | 0.000   | 0.821   | 0.000 | NA    | 0.000 | 0.000 | 13  | 0.992 | 1     |
| A.MG/A.Sand vs Coral/A.MA      | <i>Stethojulis bandanensis</i>      | 0.017   | 0.821   | 0.036 | 0.465 | 0.007 | 0.029 | 7   | 0.995 | 0.165 |
| A.MG/A.Sand vs Coral/A.MA      | <i>Stethojulis interrupta</i>       | 0.016   | 0.821   | 0.036 | 0.446 | 0.032 | 0.000 | 1   | 0.998 | 0.565 |
| A.MG/A.Sand vs Coral/A.MA      | <i>Stethojulis strigiventer</i>     | 0.004   | 0.821   | 0.021 | 0.179 | 0.000 | 0.007 | 49  | 1.000 | 0.492 |
| A.MG/A.Sand vs Coral/A.MA      | <i>Thalassoma amblycephalum</i>     | 0.002   | 0.821   | 0.010 | 0.179 | 0.000 | 0.004 | 32  | 1.000 | 0.507 |
| A.MG/A.Sand vs Coral/A.MA      | <i>Thalassoma hardwicke</i>         | 0.046   | 0.821   | 0.041 | 1.108 | 0.005 | 0.093 | 36  | 1.000 | 0.029 |
| A.MG/A.Sand vs Coral/A.MA      | <i>Thalassoma jansenii</i>          | 0.004   | 0.821   | 0.020 | 0.213 | 0.009 | 0.000 | 40  | 1.000 | 0.251 |
| A.MG/A.Sand vs Coral/A.MA      | <i>Thalassoma lunare</i>            | 0.036   | 0.821   | 0.035 | 1.014 | 0.115 | 0.113 | 45  | 1.000 | 0.966 |
| Comparison                     | species                             | average | overall | sd    | ratio | ava   | avb   | ord | cusum | p     |
| A.MG/A.Sand vs A.SG/Soft Coral | <i>Anampses caeruleopunctatus</i>   | 0.000   | 0.785   | 0.000 | NA    | 0.000 | 0.000 | 41  | 0.077 | 1     |
| A.MG/A.Sand vs A.SG/Soft Coral | <i>Anampses meleagrides</i>         | 0.008   | 0.785   | 0.026 | 0.292 | 0.015 | 0.000 | 11  | 0.149 | 0.159 |
| A.MG/A.Sand vs A.SG/Soft Coral | <i>Anampses sp.</i>                 | 0.045   | 0.785   | 0.042 | 1.076 | 0.087 | 0.015 | 14  | 0.214 | 0.001 |
| A.MG/A.Sand vs A.SG/Soft Coral | <i>Anampses twistii</i>             | 0.007   | 0.785   | 0.037 | 0.192 | 0.000 | 0.014 | 15  | 0.276 | 0.807 |
| A.MG/A.Sand vs A.SG/Soft Coral | <i>Bodianus dictynna</i>            | 0.010   | 0.785   | 0.027 | 0.370 | 0.020 | 0.000 | 28  | 0.337 | 0.6   |
| A.MG/A.Sand vs A.SG/Soft Coral | <i>Bodianus mesothorax</i>          | 0.014   | 0.785   | 0.032 | 0.448 | 0.014 | 0.016 | 3   | 0.394 | 1     |
| A.MG/A.Sand vs A.SG/Soft Coral | <i>Bodianus sp.</i>                 | 0.000   | 0.785   | 0.000 | NA    | 0.000 | 0.000 | 12  | 0.448 | 1     |
| A.MG/A.Sand vs A.SG/Soft Coral | <i>Cheilinus chlorourus</i>         | 0.038   | 0.785   | 0.055 | 0.696 | 0.062 | 0.026 | 21  | 0.497 | 0.023 |
| A.MG/A.Sand vs A.SG/Soft Coral | <i>Cheilinus fasciatus</i>          | 0.017   | 0.785   | 0.042 | 0.396 | 0.011 | 0.025 | 8   | 0.546 | 0.638 |
| A.MG/A.Sand vs A.SG/Soft Coral | <i>Cheilinus oxycephalus</i>        | 0.006   | 0.785   | 0.017 | 0.361 | 0.008 | 0.004 | 16  | 0.593 | 0.905 |
| A.MG/A.Sand vs A.SG/Soft Coral | <i>Cheilinus trilobatus</i>         | 0.057   | 0.785   | 0.058 | 0.974 | 0.077 | 0.079 | 52  | 0.638 | 0.007 |
| A.MG/A.Sand vs A.SG/Soft Coral | <i>Cheilio inermis</i>              | 0.042   | 0.785   | 0.061 | 0.692 | 0.022 | 0.075 | 47  | 0.667 | 0.022 |

|                                |                                     |       |       |       |       |       |       |    |       |       |
|--------------------------------|-------------------------------------|-------|-------|-------|-------|-------|-------|----|-------|-------|
| A.MG/A.Sand vs A.SG/Soft Coral | <i>Choerodon anchorago</i>          | 0.000 | 0.785 | 0.000 | NA    | 0.000 | 0.000 | 31 | 0.695 | 1     |
| A.MG/A.Sand vs A.SG/Soft Coral | <i>Choerodon sp.</i>                | 0.051 | 0.785 | 0.062 | 0.823 | 0.008 | 0.100 | 37 | 0.722 | 0.001 |
| A.MG/A.Sand vs A.SG/Soft Coral | <i>Coris batuensis</i>              | 0.048 | 0.785 | 0.052 | 0.923 | 0.045 | 0.081 | 26 | 0.745 | 0.058 |
| A.MG/A.Sand vs A.SG/Soft Coral | <i>Coris gaimard</i>                | 0.037 | 0.785 | 0.049 | 0.754 | 0.071 | 0.007 | 39 | 0.767 | 0.089 |
| A.MG/A.Sand vs A.SG/Soft Coral | <i>Epibulus brevis</i>              | 0.012 | 0.785 | 0.043 | 0.273 | 0.000 | 0.023 | 9  | 0.788 | 0.449 |
| A.MG/A.Sand vs A.SG/Soft Coral | <i>Epibulus insidiator</i>          | 0.000 | 0.785 | 0.000 | NA    | 0.000 | 0.000 | 25 | 0.807 | 1     |
| A.MG/A.Sand vs A.SG/Soft Coral | <i>Gomphosus varius</i>             | 0.006 | 0.785 | 0.019 | 0.303 | 0.012 | 0.000 | 6  | 0.826 | 0.949 |
| A.MG/A.Sand vs A.SG/Soft Coral | <i>Halichoeres chrysus</i>          | 0.005 | 0.785 | 0.024 | 0.213 | 0.010 | 0.000 | 33 | 0.842 | 0.196 |
| A.MG/A.Sand vs A.SG/Soft Coral | <i>Halichoeres hortulanus</i>       | 0.039 | 0.785 | 0.046 | 0.843 | 0.064 | 0.031 | 17 | 0.857 | 0.377 |
| A.MG/A.Sand vs A.SG/Soft Coral | <i>Halichoeres marginatus</i>       | 0.000 | 0.785 | 0.000 | NA    | 0.000 | 0.000 | 27 | 0.870 | 1     |
| A.MG/A.Sand vs A.SG/Soft Coral | <i>Halichoeres melanurus</i>        | 0.008 | 0.785 | 0.023 | 0.338 | 0.000 | 0.016 | 5  | 0.883 | 0.556 |
| A.MG/A.Sand vs A.SG/Soft Coral | <i>Halichoeres nigrescens</i>       | 0.000 | 0.785 | 0.000 | NA    | 0.000 | 0.000 | 30 | 0.894 | 1     |
| A.MG/A.Sand vs A.SG/Soft Coral | <i>Halichoeres podostigma</i>       | 0.015 | 0.785 | 0.034 | 0.450 | 0.005 | 0.027 | 23 | 0.904 | 0.178 |
| A.MG/A.Sand vs A.SG/Soft Coral | <i>Halichoeres prosopeion</i>       | 0.018 | 0.785 | 0.046 | 0.397 | 0.015 | 0.024 | 38 | 0.914 | 0.378 |
| A.MG/A.Sand vs A.SG/Soft Coral | <i>Halichoeres richmondi</i>        | 0.010 | 0.785 | 0.038 | 0.273 | 0.000 | 0.021 | 2  | 0.923 | 0.575 |
| A.MG/A.Sand vs A.SG/Soft Coral | <i>Halichoeres scapularis</i>       | 0.048 | 0.785 | 0.063 | 0.762 | 0.072 | 0.054 | 36 | 0.933 | 0.006 |
| A.MG/A.Sand vs A.SG/Soft Coral | <i>Halichoeres sp.</i>              | 0.000 | 0.785 | 0.000 | NA    | 0.000 | 0.000 | 4  | 0.942 | 1     |
| A.MG/A.Sand vs A.SG/Soft Coral | <i>Hemigymnus fasciatus</i>         | 0.009 | 0.785 | 0.028 | 0.308 | 0.017 | 0.000 | 40 | 0.950 | 0.937 |
| A.MG/A.Sand vs A.SG/Soft Coral | <i>Hemigymnus melapterus</i>        | 0.022 | 0.785 | 0.043 | 0.516 | 0.044 | 0.000 | 10 | 0.958 | 0.553 |
| A.MG/A.Sand vs A.SG/Soft Coral | <i>Hologymnosus annulatus</i>       | 0.003 | 0.785 | 0.016 | 0.192 | 0.000 | 0.006 | 19 | 0.966 | 0.438 |
| A.MG/A.Sand vs A.SG/Soft Coral | <i>Hologymnosus sp.</i>             | 0.013 | 0.785 | 0.032 | 0.415 | 0.023 | 0.005 | 20 | 0.972 | 0.006 |
| A.MG/A.Sand vs A.SG/Soft Coral | <i>Labrichthys unilineatus</i>      | 0.005 | 0.785 | 0.019 | 0.269 | 0.004 | 0.007 | 34 | 0.979 | 1     |
| A.MG/A.Sand vs A.SG/Soft Coral | <i>Labropsis manabei</i>            | 0.000 | 0.785 | 0.000 | NA    | 0.000 | 0.000 | 51 | 0.984 | 1     |
| A.MG/A.Sand vs A.SG/Soft Coral | <i>Labropsis xanthonota</i>         | 0.007 | 0.785 | 0.026 | 0.277 | 0.000 | 0.014 | 46 | 0.989 | 0.216 |
| A.MG/A.Sand vs A.SG/Soft Coral | <i>Macropharyngodon meleagris</i>   | 0.021 | 0.785 | 0.036 | 0.579 | 0.032 | 0.013 | 43 | 0.993 | 0.849 |
| A.MG/A.Sand vs A.SG/Soft Coral | <i>Macropharyngodon negrosensis</i> | 0.008 | 0.785 | 0.027 | 0.287 | 0.009 | 0.007 | 32 | 0.997 | 0.166 |
| A.MG/A.Sand vs A.SG/Soft Coral | <i>Novaculichthys taeniourus</i>    | 0.017 | 0.785 | 0.034 | 0.503 | 0.017 | 0.020 | 50 | 1.000 | 0.438 |
| A.MG/A.Sand vs A.SG/Soft Coral | <i>Oxycheilinus celebicus</i>       | 0.007 | 0.785 | 0.025 | 0.277 | 0.000 | 0.014 | 1  | 1.000 | 0.595 |
| A.MG/A.Sand vs A.SG/Soft Coral | <i>Oxycheilinus digramma</i>        | 0.061 | 0.785 | 0.055 | 1.101 | 0.060 | 0.116 | 7  | 1.000 | 0.707 |
| A.MG/A.Sand vs A.SG/Soft Coral | <i>Oxycheilinus sp.</i>             | 0.000 | 0.785 | 0.000 | NA    | 0.000 | 0.000 | 13 | 1.000 | 1     |
| A.MG/A.Sand vs A.SG/Soft Coral | <i>Oxycheilinus unifasciatus</i>    | 0.003 | 0.785 | 0.016 | 0.213 | 0.007 | 0.000 | 18 | 1.000 | 0.217 |

| A.MG/A.Sand vs A.SG/Soft Coral | <i>Pseudocheilinus hexataenia</i> | 0.000   | 0.785   | 0.000 | NA    | 0.000 | 0.000 | 22  | 1.000 | 1     |
|--------------------------------|-----------------------------------|---------|---------|-------|-------|-------|-------|-----|-------|-------|
| A.MG/A.Sand vs A.SG/Soft Coral | <i>Pseudodax moluccanus</i>       | 0.000   | 0.785   | 0.000 | NA    | 0.000 | 0.000 | 24  | 1.000 | 1     |
| A.MG/A.Sand vs A.SG/Soft Coral | <i>Stethojulis bandanensis</i>    | 0.003   | 0.785   | 0.016 | 0.213 | 0.007 | 0.000 | 29  | 1.000 | 0.966 |
| A.MG/A.Sand vs A.SG/Soft Coral | <i>Stethojulis interrupta</i>     | 0.023   | 0.785   | 0.043 | 0.525 | 0.032 | 0.018 | 35  | 1.000 | 0.225 |
| A.MG/A.Sand vs A.SG/Soft Coral | <i>Stethojulis strigiventer</i>   | 0.000   | 0.785   | 0.000 | NA    | 0.000 | 0.000 | 42  | 1.000 | 1     |
| A.MG/A.Sand vs A.SG/Soft Coral | <i>Thalassoma amblycephalum</i>   | 0.000   | 0.785   | 0.000 | NA    | 0.000 | 0.000 | 44  | 1.000 | 1     |
| A.MG/A.Sand vs A.SG/Soft Coral | <i>Thalassoma hardwicke</i>       | 0.003   | 0.785   | 0.012 | 0.213 | 0.005 | 0.000 | 45  | 1.000 | 1     |
| A.MG/A.Sand vs A.SG/Soft Coral | <i>Thalassoma janseni</i>         | 0.004   | 0.785   | 0.020 | 0.213 | 0.009 | 0.000 | 48  | 1.000 | 0.251 |
| A.MG/A.Sand vs A.SG/Soft Coral | <i>Thalassoma lunare</i>          | 0.035   | 0.785   | 0.032 | 1.088 | 0.115 | 0.141 | 49  | 1.000 | 0.978 |
| Comparison                     | species                           | average | overall | sd    | ratio | ava   | avb   | ord | cusum | p     |
| A.MG/A.Sand vs A.CR/A.RF       | <i>Anampses caeruleopunctatus</i> | 0.000   | 0.839   | 0.000 | NA    | 0.000 | 0.000 | 52  | 0.081 | 1     |
| A.MG/A.Sand vs A.CR/A.RF       | <i>Anampses meleagrides</i>       | 0.008   | 0.839   | 0.026 | 0.292 | 0.015 | 0.000 | 16  | 0.154 | 0.255 |
| A.MG/A.Sand vs A.CR/A.RF       | <i>Anampses sp.</i>               | 0.043   | 0.839   | 0.040 | 1.067 | 0.087 | 0.010 | 50  | 0.217 | 0.001 |
| A.MG/A.Sand vs A.CR/A.RF       | <i>Anampses twistii</i>           | 0.011   | 0.839   | 0.038 | 0.301 | 0.000 | 0.023 | 21  | 0.279 | 0.546 |
| A.MG/A.Sand vs A.CR/A.RF       | <i>Bodianus dictynna</i>          | 0.043   | 0.839   | 0.084 | 0.519 | 0.020 | 0.074 | 41  | 0.333 | 0.004 |
| A.MG/A.Sand vs A.CR/A.RF       | <i>Bodianus mesothorax</i>        | 0.044   | 0.839   | 0.064 | 0.691 | 0.014 | 0.084 | 6   | 0.386 | 0.357 |
| A.MG/A.Sand vs A.CR/A.RF       | <i>Bodianus sp.</i>               | 0.000   | 0.839   | 0.000 | NA    | 0.000 | 0.000 | 5   | 0.438 | 1     |
| A.MG/A.Sand vs A.CR/A.RF       | <i>Cheilinus chlorourus</i>       | 0.041   | 0.839   | 0.061 | 0.670 | 0.062 | 0.030 | 3   | 0.489 | 0.07  |
| A.MG/A.Sand vs A.CR/A.RF       | <i>Cheilinus fasciatus</i>        | 0.028   | 0.839   | 0.078 | 0.354 | 0.011 | 0.046 | 8   | 0.537 | 0.201 |
| A.MG/A.Sand vs A.CR/A.RF       | <i>Cheilinus oxycephalus</i>      | 0.004   | 0.839   | 0.013 | 0.307 | 0.008 | 0.000 | 11  | 0.584 | 0.894 |
| A.MG/A.Sand vs A.CR/A.RF       | <i>Cheilinus trilobatus</i>       | 0.040   | 0.839   | 0.046 | 0.853 | 0.077 | 0.012 | 28  | 0.627 | 0.501 |
| A.MG/A.Sand vs A.CR/A.RF       | <i>Cheilio inermis</i>            | 0.027   | 0.839   | 0.060 | 0.449 | 0.022 | 0.035 | 37  | 0.661 | 0.482 |
| A.MG/A.Sand vs A.CR/A.RF       | <i>Choerodon anchorago</i>        | 0.000   | 0.839   | 0.000 | NA    | 0.000 | 0.000 | 9   | 0.694 | 1     |
| A.MG/A.Sand vs A.CR/A.RF       | <i>Choerodon sp.</i>              | 0.004   | 0.839   | 0.014 | 0.307 | 0.008 | 0.000 | 19  | 0.726 | 0.991 |
| A.MG/A.Sand vs A.CR/A.RF       | <i>Coris batuensis</i>            | 0.023   | 0.839   | 0.038 | 0.593 | 0.045 | 0.000 | 12  | 0.759 | 0.937 |
| A.MG/A.Sand vs A.CR/A.RF       | <i>Coris gaimard</i>              | 0.061   | 0.839   | 0.066 | 0.928 | 0.071 | 0.094 | 45  | 0.789 | 0.002 |
| A.MG/A.Sand vs A.CR/A.RF       | <i>Epibulus brevis</i>            | 0.000   | 0.839   | 0.000 | NA    | 0.000 | 0.000 | 15  | 0.816 | 1     |
| A.MG/A.Sand vs A.CR/A.RF       | <i>Epibulus insidiator</i>        | 0.000   | 0.839   | 0.000 | NA    | 0.000 | 0.000 | 31  | 0.842 | 1     |
| A.MG/A.Sand vs A.CR/A.RF       | <i>Gomphosus varius</i>           | 0.027   | 0.839   | 0.055 | 0.494 | 0.012 | 0.046 | 47  | 0.862 | 0.041 |
| A.MG/A.Sand vs A.CR/A.RF       | <i>Halichoeres chrysus</i>        | 0.005   | 0.839   | 0.024 | 0.213 | 0.010 | 0.000 | 26  | 0.879 | 0.303 |
| A.MG/A.Sand vs A.CR/A.RF       | <i>Halichoeres hortulanus</i>     | 0.052   | 0.839   | 0.057 | 0.903 | 0.064 | 0.078 | 30  | 0.895 | 0.037 |

|                          |                                     |       |       |       |       |       |       |    |       |       |
|--------------------------|-------------------------------------|-------|-------|-------|-------|-------|-------|----|-------|-------|
| A.MG/A.Sand vs A.CR/A.RF | <i>Halichoeres marginatus</i>       | 0.000 | 0.839 | 0.000 | NA    | 0.000 | 0.000 | 39 | 0.911 | 1     |
| A.MG/A.Sand vs A.CR/A.RF | <i>Halichoeres melanurus</i>        | 0.000 | 0.839 | 0.000 | NA    | 0.000 | 0.000 | 4  | 0.925 | 1     |
| A.MG/A.Sand vs A.CR/A.RF | <i>Halichoeres nigrescens</i>       | 0.000 | 0.839 | 0.000 | NA    | 0.000 | 0.000 | 33 | 0.938 | 1     |
| A.MG/A.Sand vs A.CR/A.RF | <i>Halichoeres podostigma</i>       | 0.003 | 0.839 | 0.013 | 0.213 | 0.005 | 0.000 | 27 | 0.951 | 0.954 |
| A.MG/A.Sand vs A.CR/A.RF | <i>Halichoeres prosopeion</i>       | 0.014 | 0.839 | 0.040 | 0.355 | 0.015 | 0.015 | 2  | 0.960 | 0.598 |
| A.MG/A.Sand vs A.CR/A.RF | <i>Halichoeres richmondi</i>        | 0.011 | 0.839 | 0.036 | 0.301 | 0.000 | 0.022 | 20 | 0.966 | 0.501 |
| A.MG/A.Sand vs A.CR/A.RF | <i>Halichoeres scapularis</i>       | 0.036 | 0.839 | 0.062 | 0.583 | 0.072 | 0.000 | 51 | 0.971 | 0.313 |
| A.MG/A.Sand vs A.CR/A.RF | <i>Halichoeres sp.</i>              | 0.000 | 0.839 | 0.000 | NA    | 0.000 | 0.000 | 38 | 0.977 | 1     |
| A.MG/A.Sand vs A.CR/A.RF | <i>Hemigymnus fasciatus</i>         | 0.014 | 0.839 | 0.032 | 0.429 | 0.017 | 0.012 | 14 | 0.982 | 0.619 |
| A.MG/A.Sand vs A.CR/A.RF | <i>Hemigymnus melapterus</i>        | 0.022 | 0.839 | 0.043 | 0.515 | 0.044 | 0.000 | 10 | 0.986 | 0.516 |
| A.MG/A.Sand vs A.CR/A.RF | <i>Hologymnosus annulatus</i>       | 0.000 | 0.839 | 0.000 | NA    | 0.000 | 0.000 | 46 | 0.990 | 1     |
| A.MG/A.Sand vs A.CR/A.RF | <i>Hologymnosus sp.</i>             | 0.011 | 0.839 | 0.031 | 0.369 | 0.023 | 0.000 | 43 | 0.995 | 0.139 |
| A.MG/A.Sand vs A.CR/A.RF | <i>Labrichthys unilineatus</i>      | 0.002 | 0.839 | 0.009 | 0.213 | 0.004 | 0.000 | 25 | 0.998 | 0.998 |
| A.MG/A.Sand vs A.CR/A.RF | <i>Labropsis manabei</i>            | 0.000 | 0.839 | 0.000 | NA    | 0.000 | 0.000 | 34 | 1.000 | 1     |
| A.MG/A.Sand vs A.CR/A.RF | <i>Labropsis xanthonota</i>         | 0.000 | 0.839 | 0.000 | NA    | 0.000 | 0.000 | 1  | 1.000 | 1     |
| A.MG/A.Sand vs A.CR/A.RF | <i>Macropharyngodon meleagris</i>   | 0.028 | 0.839 | 0.051 | 0.553 | 0.032 | 0.030 | 7  | 1.000 | 0.458 |
| A.MG/A.Sand vs A.CR/A.RF | <i>Macropharyngodon negrosensis</i> | 0.004 | 0.839 | 0.020 | 0.213 | 0.009 | 0.000 | 13 | 1.000 | 0.574 |
| A.MG/A.Sand vs A.CR/A.RF | <i>Novaculichthys taeniourus</i>    | 0.013 | 0.839 | 0.027 | 0.489 | 0.017 | 0.012 | 17 | 1.000 | 0.568 |
| A.MG/A.Sand vs A.CR/A.RF | <i>Oxycheilinus celebicus</i>       | 0.000 | 0.839 | 0.000 | NA    | 0.000 | 0.000 | 18 | 1.000 | 1     |
| A.MG/A.Sand vs A.CR/A.RF | <i>Oxycheilinus digramma</i>        | 0.045 | 0.839 | 0.065 | 0.697 | 0.060 | 0.047 | 22 | 1.000 | 0.992 |
| A.MG/A.Sand vs A.CR/A.RF | <i>Oxycheilinus sp.</i>             | 0.000 | 0.839 | 0.000 | NA    | 0.000 | 0.000 | 23 | 1.000 | 1     |
| A.MG/A.Sand vs A.CR/A.RF | <i>Oxycheilinus unifasciatus</i>    | 0.003 | 0.839 | 0.016 | 0.213 | 0.007 | 0.000 | 24 | 1.000 | 0.328 |
| A.MG/A.Sand vs A.CR/A.RF | <i>Pseudocheilinus hexataenia</i>   | 0.000 | 0.839 | 0.000 | NA    | 0.000 | 0.000 | 29 | 1.000 | 1     |
| A.MG/A.Sand vs A.CR/A.RF | <i>Pseudodax moluccanus</i>         | 0.026 | 0.839 | 0.085 | 0.301 | 0.000 | 0.051 | 32 | 1.000 | 0.11  |
| A.MG/A.Sand vs A.CR/A.RF | <i>Stethojulis bandanensis</i>      | 0.003 | 0.839 | 0.016 | 0.213 | 0.007 | 0.000 | 35 | 1.000 | 0.901 |
| A.MG/A.Sand vs A.CR/A.RF | <i>Stethojulis interrupta</i>       | 0.016 | 0.839 | 0.036 | 0.446 | 0.032 | 0.000 | 36 | 1.000 | 0.516 |
| A.MG/A.Sand vs A.CR/A.RF | <i>Stethojulis strigiventer</i>     | 0.000 | 0.839 | 0.000 | NA    | 0.000 | 0.000 | 40 | 1.000 | 1     |
| A.MG/A.Sand vs A.CR/A.RF | <i>Thalassoma amblycephalum</i>     | 0.000 | 0.839 | 0.000 | NA    | 0.000 | 0.000 | 42 | 1.000 | 1     |
| A.MG/A.Sand vs A.CR/A.RF | <i>Thalassoma hardwicke</i>         | 0.053 | 0.839 | 0.091 | 0.584 | 0.005 | 0.105 | 44 | 1.000 | 0.05  |
| A.MG/A.Sand vs A.CR/A.RF | <i>Thalassoma janseni</i>           | 0.004 | 0.839 | 0.020 | 0.213 | 0.009 | 0.000 | 48 | 1.000 | 0.357 |
| A.MG/A.Sand vs A.CR/A.RF | <i>Thalassoma lunare</i>            | 0.068 | 0.839 | 0.047 | 1.428 | 0.115 | 0.173 | 49 | 1.000 | 0.001 |

| Comparison            | species                           | average | overall | sd    | ratio | ava   | avb   | ord | cusum | p     |
|-----------------------|-----------------------------------|---------|---------|-------|-------|-------|-------|-----|-------|-------|
| Rub/EAM vs Coral/A.MA | <i>Anampses caeruleopunctatus</i> | 0.002   | 0.793   | 0.011 | 0.179 | 0.000 | 0.004 | 41  | 0.089 | 0.42  |
| Rub/EAM vs Coral/A.MA | <i>Anampses meleagrides</i>       | 0.002   | 0.793   | 0.013 | 0.179 | 0.000 | 0.005 | 6   | 0.162 | 0.708 |
| Rub/EAM vs Coral/A.MA | <i>Anampses sp.</i>               | 0.011   | 0.793   | 0.027 | 0.422 | 0.023 | 0.000 | 52  | 0.234 | 0.97  |
| Rub/EAM vs Coral/A.MA | <i>Anampses twistii</i>           | 0.012   | 0.793   | 0.043 | 0.280 | 0.000 | 0.024 | 15  | 0.297 | 0.512 |
| Rub/EAM vs Coral/A.MA | <i>Bodianus dictynna</i>          | 0.000   | 0.793   | 0.000 | NA    | 0.000 | 0.000 | 50  | 0.355 | 1     |
| Rub/EAM vs Coral/A.MA | <i>Bodianus mesothorax</i>        | 0.058   | 0.793   | 0.046 | 1.263 | 0.041 | 0.106 | 31  | 0.413 | 0.023 |
| Rub/EAM vs Coral/A.MA | <i>Bodianus sp.</i>               | 0.002   | 0.793   | 0.013 | 0.179 | 0.000 | 0.005 | 37  | 0.460 | 0.413 |
| Rub/EAM vs Coral/A.MA | <i>Cheilinus chlorourus</i>       | 0.011   | 0.793   | 0.029 | 0.360 | 0.010 | 0.013 | 34  | 0.507 | 0.966 |
| Rub/EAM vs Coral/A.MA | <i>Cheilinus fasciatus</i>        | 0.026   | 0.793   | 0.048 | 0.542 | 0.052 | 0.000 | 47  | 0.541 | 0.22  |
| Rub/EAM vs Coral/A.MA | <i>Cheilinus oxycephalus</i>      | 0.014   | 0.793   | 0.031 | 0.460 | 0.000 | 0.029 | 39  | 0.575 | 0.2   |
| Rub/EAM vs Coral/A.MA | <i>Cheilinus trilobatus</i>       | 0.023   | 0.793   | 0.055 | 0.423 | 0.041 | 0.007 | 9   | 0.608 | 0.938 |
| Rub/EAM vs Coral/A.MA | <i>Cheilio inermis</i>            | 0.004   | 0.793   | 0.022 | 0.179 | 0.000 | 0.008 | 21  | 0.641 | 0.997 |
| Rub/EAM vs Coral/A.MA | <i>Choerodon anchorago</i>        | 0.003   | 0.793   | 0.014 | 0.179 | 0.000 | 0.005 | 28  | 0.673 | 0.391 |
| Rub/EAM vs Coral/A.MA | <i>Choerodon sp.</i>              | 0.000   | 0.793   | 0.000 | NA    | 0.000 | 0.000 | 30  | 0.705 | 1     |
| Rub/EAM vs Coral/A.MA | <i>Coris batuensis</i>            | 0.050   | 0.793   | 0.066 | 0.751 | 0.096 | 0.014 | 40  | 0.736 | 0.095 |
| Rub/EAM vs Coral/A.MA | <i>Coris gaimard</i>              | 0.010   | 0.793   | 0.026 | 0.386 | 0.012 | 0.010 | 46  | 0.767 | 0.989 |
| Rub/EAM vs Coral/A.MA | <i>Epibulus brevis</i>            | 0.009   | 0.793   | 0.024 | 0.377 | 0.000 | 0.018 | 11  | 0.796 | 0.562 |
| Rub/EAM vs Coral/A.MA | <i>Epibulus insidiator</i>        | 0.005   | 0.793   | 0.020 | 0.257 | 0.000 | 0.010 | 10  | 0.814 | 0.318 |
| Rub/EAM vs Coral/A.MA | <i>Gomphosus varius</i>           | 0.012   | 0.793   | 0.028 | 0.422 | 0.000 | 0.024 | 4   | 0.830 | 0.586 |
| Rub/EAM vs Coral/A.MA | <i>Halichoeres chrysus</i>        | 0.000   | 0.793   | 0.000 | NA    | 0.000 | 0.000 | 19  | 0.845 | 1     |
| Rub/EAM vs Coral/A.MA | <i>Halichoeres hortulanus</i>     | 0.026   | 0.793   | 0.040 | 0.654 | 0.010 | 0.048 | 3   | 0.859 | 0.935 |
| Rub/EAM vs Coral/A.MA | <i>Halichoeres marginatus</i>     | 0.007   | 0.793   | 0.027 | 0.256 | 0.000 | 0.014 | 26  | 0.872 | 0.331 |
| Rub/EAM vs Coral/A.MA | <i>Halichoeres melanurus</i>      | 0.008   | 0.793   | 0.024 | 0.317 | 0.000 | 0.015 | 8   | 0.886 | 0.542 |
| Rub/EAM vs Coral/A.MA | <i>Halichoeres nigrescens</i>     | 0.003   | 0.793   | 0.015 | 0.179 | 0.000 | 0.005 | 16  | 0.898 | 0.43  |
| Rub/EAM vs Coral/A.MA | <i>Halichoeres podostigma</i>     | 0.006   | 0.793   | 0.020 | 0.317 | 0.000 | 0.013 | 17  | 0.910 | 0.795 |
| Rub/EAM vs Coral/A.MA | <i>Halichoeres prosopeion</i>     | 0.011   | 0.793   | 0.029 | 0.365 | 0.000 | 0.022 | 23  | 0.919 | 0.768 |
| Rub/EAM vs Coral/A.MA | <i>Halichoeres richmondi</i>      | 0.006   | 0.793   | 0.026 | 0.254 | 0.000 | 0.013 | 22  | 0.928 | 0.771 |
| Rub/EAM vs Coral/A.MA | <i>Halichoeres scapularis</i>     | 0.025   | 0.793   | 0.048 | 0.526 | 0.051 | 0.000 | 27  | 0.936 | 0.665 |
| Rub/EAM vs Coral/A.MA | <i>Halichoeres sp.</i>            | 0.005   | 0.793   | 0.021 | 0.258 | 0.000 | 0.011 | 25  | 0.944 | 0.324 |
| Rub/EAM vs Coral/A.MA | <i>Hemigymnus fasciatus</i>       | 0.025   | 0.793   | 0.040 | 0.624 | 0.030 | 0.029 | 29  | 0.951 | 0.058 |



|                            |                                     |         |         |       |       |       |       |     |       |       |
|----------------------------|-------------------------------------|---------|---------|-------|-------|-------|-------|-----|-------|-------|
| Rub/EAM vs Coral/A.MA      | <i>Hemigymnus melapterus</i>        | 0.046   | 0.793   | 0.081 | 0.568 | 0.078 | 0.025 | 44  | 0.958 | 0.024 |
| Rub/EAM vs Coral/A.MA      | <i>Hologymnosus annulatus</i>       | 0.000   | 0.793   | 0.000 | NA    | 0.000 | 0.000 | 18  | 0.964 | 1     |
| Rub/EAM vs Coral/A.MA      | <i>Hologymnosus sp.</i>             | 0.000   | 0.793   | 0.000 | NA    | 0.000 | 0.000 | 42  | 0.970 | 1     |
| Rub/EAM vs Coral/A.MA      | <i>Labrichthys unilineatus</i>      | 0.037   | 0.793   | 0.042 | 0.879 | 0.000 | 0.074 | 12  | 0.975 | 0.01  |
| Rub/EAM vs Coral/A.MA      | <i>Labropsis manabei</i>            | 0.003   | 0.793   | 0.016 | 0.179 | 0.000 | 0.006 | 48  | 0.979 | 0.403 |
| Rub/EAM vs Coral/A.MA      | <i>Labropsis xanthonota</i>         | 0.000   | 0.793   | 0.000 | NA    | 0.000 | 0.000 | 35  | 0.983 | 1     |
| Rub/EAM vs Coral/A.MA      | <i>Macropharyngodon meleagris</i>   | 0.037   | 0.793   | 0.057 | 0.661 | 0.046 | 0.042 | 24  | 0.986 | 0.129 |
| Rub/EAM vs Coral/A.MA      | <i>Macropharyngodon negrosensis</i> | 0.000   | 0.793   | 0.000 | NA    | 0.000 | 0.000 | 13  | 0.989 | 1     |
| Rub/EAM vs Coral/A.MA      | <i>Novaculichthys taeniourus</i>    | 0.027   | 0.793   | 0.066 | 0.407 | 0.054 | 0.000 | 2   | 0.992 | 0.088 |
| Rub/EAM vs Coral/A.MA      | <i>Oxycheilinus celebicus</i>       | 0.025   | 0.793   | 0.087 | 0.288 | 0.050 | 0.000 | 7   | 0.995 | 0.112 |
| Rub/EAM vs Coral/A.MA      | <i>Oxycheilinus digramma</i>        | 0.070   | 0.793   | 0.050 | 1.411 | 0.135 | 0.138 | 1   | 0.998 | 0.131 |
| Rub/EAM vs Coral/A.MA      | <i>Oxycheilinus sp.</i>             | 0.004   | 0.793   | 0.017 | 0.257 | 0.000 | 0.009 | 49  | 1.000 | 0.315 |
| Rub/EAM vs Coral/A.MA      | <i>Oxycheilinus unifasciatus</i>    | 0.000   | 0.793   | 0.000 | NA    | 0.000 | 0.000 | 5   | 1.000 | 1     |
| Rub/EAM vs Coral/A.MA      | <i>Pseudocheilinus hexataenia</i>   | 0.005   | 0.793   | 0.021 | 0.255 | 0.000 | 0.011 | 14  | 1.000 | 0.306 |
| Rub/EAM vs Coral/A.MA      | <i>Pseudodax moluccanus</i>         | 0.000   | 0.793   | 0.000 | NA    | 0.000 | 0.000 | 20  | 1.000 | 1     |
| Rub/EAM vs Coral/A.MA      | <i>Stethojulis bandanensis</i>      | 0.024   | 0.793   | 0.049 | 0.498 | 0.024 | 0.029 | 32  | 1.000 | 0.042 |
| Rub/EAM vs Coral/A.MA      | <i>Stethojulis interrupta</i>       | 0.027   | 0.793   | 0.068 | 0.404 | 0.055 | 0.000 | 33  | 1.000 | 0.106 |
| Rub/EAM vs Coral/A.MA      | <i>Stethojulis strigiventer</i>     | 0.004   | 0.793   | 0.021 | 0.179 | 0.000 | 0.007 | 36  | 1.000 | 0.416 |
| Rub/EAM vs Coral/A.MA      | <i>Thalassoma amblycephalum</i>     | 0.002   | 0.793   | 0.010 | 0.179 | 0.000 | 0.004 | 38  | 1.000 | 0.411 |
| Rub/EAM vs Coral/A.MA      | <i>Thalassoma hardwicke</i>         | 0.046   | 0.793   | 0.042 | 1.101 | 0.000 | 0.093 | 43  | 1.000 | 0.106 |
| Rub/EAM vs Coral/A.MA      | <i>Thalassoma janseni</i>           | 0.000   | 0.793   | 0.000 | NA    | 0.000 | 0.000 | 45  | 1.000 | 1     |
| Rub/EAM vs Coral/A.MA      | <i>Thalassoma lunare</i>            | 0.057   | 0.793   | 0.044 | 1.302 | 0.193 | 0.113 | 51  | 1.000 | 0.016 |
| Comparison                 | species                             | average | overall | sd    | ratio | ava   | avb   | ord | cusum | p     |
| Rub/EAM vs A.SG/Soft Coral | <i>Anampses caeruleopunctatus</i>   | 0.000   | 0.764   | 0.000 | NA    | 0.000 | 0.000 | 41  | 0.096 | 1     |
| Rub/EAM vs A.SG/Soft Coral | <i>Anampses meleagrides</i>         | 0.000   | 0.764   | 0.000 | NA    | 0.000 | 0.000 | 15  | 0.177 | 1     |
| Rub/EAM vs A.SG/Soft Coral | <i>Anampses sp.</i>                 | 0.017   | 0.764   | 0.035 | 0.501 | 0.023 | 0.015 | 11  | 0.245 | 0.787 |
| Rub/EAM vs A.SG/Soft Coral | <i>Anampses twistii</i>             | 0.007   | 0.764   | 0.037 | 0.192 | 0.000 | 0.014 | 14  | 0.310 | 0.756 |
| Rub/EAM vs A.SG/Soft Coral | <i>Bodianus dictynna</i>            | 0.000   | 0.764   | 0.000 | NA    | 0.000 | 0.000 | 52  | 0.375 | 1     |
| Rub/EAM vs A.SG/Soft Coral | <i>Bodianus mesothorax</i>          | 0.026   | 0.764   | 0.054 | 0.493 | 0.041 | 0.016 | 28  | 0.430 | 0.976 |
| Rub/EAM vs A.SG/Soft Coral | <i>Bodianus sp.</i>                 | 0.000   | 0.764   | 0.000 | NA    | 0.000 | 0.000 | 31  | 0.481 | 1     |
| Rub/EAM vs A.SG/Soft Coral | <i>Cheilinus chlorourus</i>         | 0.017   | 0.764   | 0.040 | 0.425 | 0.010 | 0.026 | 12  | 0.530 | 0.82  |

|                            |                                     |       |       |       |       |       |       |    |       |       |
|----------------------------|-------------------------------------|-------|-------|-------|-------|-------|-------|----|-------|-------|
| Rub/EAM vs A.SG/Soft Coral | <i>Cheilinus fasciatus</i>          | 0.034 | 0.764 | 0.053 | 0.638 | 0.052 | 0.025 | 39 | 0.574 | 0.088 |
| Rub/EAM vs A.SG/Soft Coral | <i>Cheilinus oxycephalus</i>        | 0.002 | 0.764 | 0.012 | 0.192 | 0.000 | 0.004 | 9  | 0.618 | 0.975 |
| Rub/EAM vs A.SG/Soft Coral | <i>Cheilinus trilobatus</i>         | 0.051 | 0.764 | 0.072 | 0.714 | 0.041 | 0.079 | 47 | 0.662 | 0.096 |
| Rub/EAM vs A.SG/Soft Coral | <i>Cheilio inermis</i>              | 0.037 | 0.764 | 0.063 | 0.592 | 0.000 | 0.075 | 40 | 0.703 | 0.18  |
| Rub/EAM vs A.SG/Soft Coral | <i>Choerodon anchorago</i>          | 0.000 | 0.764 | 0.000 | NA    | 0.000 | 0.000 | 37 | 0.738 | 1     |
| Rub/EAM vs A.SG/Soft Coral | <i>Choerodon sp.</i>                | 0.050 | 0.764 | 0.064 | 0.784 | 0.000 | 0.100 | 6  | 0.773 | 0.004 |
| Rub/EAM vs A.SG/Soft Coral | <i>Coris batuensis</i>              | 0.062 | 0.764 | 0.064 | 0.977 | 0.096 | 0.081 | 21 | 0.798 | 0.007 |
| Rub/EAM vs A.SG/Soft Coral | <i>Coris gaimard</i>                | 0.009 | 0.764 | 0.026 | 0.345 | 0.012 | 0.007 | 3  | 0.821 | 0.987 |
| Rub/EAM vs A.SG/Soft Coral | <i>Epibulus brevis</i>              | 0.012 | 0.764 | 0.043 | 0.272 | 0.000 | 0.023 | 8  | 0.843 | 0.482 |
| Rub/EAM vs A.SG/Soft Coral | <i>Epibulus insidiator</i>          | 0.000 | 0.764 | 0.000 | NA    | 0.000 | 0.000 | 30 | 0.862 | 1     |
| Rub/EAM vs A.SG/Soft Coral | <i>Gomphosus varius</i>             | 0.000 | 0.764 | 0.000 | NA    | 0.000 | 0.000 | 25 | 0.880 | 1     |
| Rub/EAM vs A.SG/Soft Coral | <i>Halichoeres chrysus</i>          | 0.000 | 0.764 | 0.000 | NA    | 0.000 | 0.000 | 26 | 0.896 | 1     |
| Rub/EAM vs A.SG/Soft Coral | <i>Halichoeres hortulanus</i>       | 0.019 | 0.764 | 0.040 | 0.480 | 0.010 | 0.031 | 46 | 0.911 | 0.982 |
| Rub/EAM vs A.SG/Soft Coral | <i>Halichoeres marginatus</i>       | 0.000 | 0.764 | 0.000 | NA    | 0.000 | 0.000 | 17 | 0.927 | 1     |
| Rub/EAM vs A.SG/Soft Coral | <i>Halichoeres melanurus</i>        | 0.008 | 0.764 | 0.023 | 0.338 | 0.000 | 0.016 | 27 | 0.940 | 0.534 |
| Rub/EAM vs A.SG/Soft Coral | <i>Halichoeres nigrescens</i>       | 0.000 | 0.764 | 0.000 | NA    | 0.000 | 0.000 | 16 | 0.952 | 1     |
| Rub/EAM vs A.SG/Soft Coral | <i>Halichoeres podostigma</i>       | 0.013 | 0.764 | 0.033 | 0.399 | 0.000 | 0.027 | 23 | 0.962 | 0.339 |
| Rub/EAM vs A.SG/Soft Coral | <i>Halichoeres prosopeion</i>       | 0.012 | 0.764 | 0.036 | 0.338 | 0.000 | 0.024 | 36 | 0.971 | 0.707 |
| Rub/EAM vs A.SG/Soft Coral | <i>Halichoeres richmondi</i>        | 0.010 | 0.764 | 0.038 | 0.272 | 0.000 | 0.021 | 4  | 0.981 | 0.561 |
| Rub/EAM vs A.SG/Soft Coral | <i>Halichoeres scapularis</i>       | 0.042 | 0.764 | 0.054 | 0.767 | 0.051 | 0.054 | 38 | 0.986 | 0.148 |
| Rub/EAM vs A.SG/Soft Coral | <i>Halichoeres sp.</i>              | 0.000 | 0.764 | 0.000 | NA    | 0.000 | 0.000 | 34 | 0.990 | 1     |
| Rub/EAM vs A.SG/Soft Coral | <i>Hemigymnus fasciatus</i>         | 0.015 | 0.764 | 0.035 | 0.424 | 0.030 | 0.000 | 32 | 0.994 | 0.533 |
| Rub/EAM vs A.SG/Soft Coral | <i>Hemigymnus melapterus</i>        | 0.039 | 0.764 | 0.084 | 0.465 | 0.078 | 0.000 | 33 | 0.997 | 0.083 |
| Rub/EAM vs A.SG/Soft Coral | <i>Hologymnosus annulatus</i>       | 0.003 | 0.764 | 0.016 | 0.192 | 0.000 | 0.006 | 10 | 1.000 | 0.371 |
| Rub/EAM vs A.SG/Soft Coral | <i>Hologymnosus sp.</i>             | 0.002 | 0.764 | 0.012 | 0.192 | 0.000 | 0.005 | 1  | 1.000 | 0.782 |
| Rub/EAM vs A.SG/Soft Coral | <i>Labrichthys unilineatus</i>      | 0.003 | 0.764 | 0.018 | 0.192 | 0.000 | 0.007 | 2  | 1.000 | 0.998 |
| Rub/EAM vs A.SG/Soft Coral | <i>Labropsis manabei</i>            | 0.000 | 0.764 | 0.000 | NA    | 0.000 | 0.000 | 5  | 1.000 | 1     |
| Rub/EAM vs A.SG/Soft Coral | <i>Labropsis xanthonota</i>         | 0.007 | 0.764 | 0.026 | 0.276 | 0.000 | 0.014 | 7  | 1.000 | 0.303 |
| Rub/EAM vs A.SG/Soft Coral | <i>Macropharyngodon meleagris</i>   | 0.027 | 0.764 | 0.057 | 0.479 | 0.046 | 0.013 | 13 | 1.000 | 0.51  |
| Rub/EAM vs A.SG/Soft Coral | <i>Macropharyngodon negrosensis</i> | 0.004 | 0.764 | 0.019 | 0.192 | 0.000 | 0.007 | 18 | 1.000 | 0.462 |
| Rub/EAM vs A.SG/Soft Coral | <i>Novaculichthys taeniourus</i>    | 0.034 | 0.764 | 0.066 | 0.511 | 0.054 | 0.020 | 19 | 1.000 | 0.026 |

|                            |                                   |         |         |       |       |       |       |     |       |       |
|----------------------------|-----------------------------------|---------|---------|-------|-------|-------|-------|-----|-------|-------|
| Rub/EAM vs A.SG/Soft Coral | <i>Oxycheilinus celebicus</i>     | 0.031   | 0.764   | 0.087 | 0.356 | 0.050 | 0.014 | 20  | 1.000 | 0.036 |
| Rub/EAM vs A.SG/Soft Coral | <i>Oxycheilinus digramma</i>      | 0.073   | 0.764   | 0.060 | 1.210 | 0.135 | 0.116 | 22  | 1.000 | 0.075 |
| Rub/EAM vs A.SG/Soft Coral | <i>Oxycheilinus sp.</i>           | 0.000   | 0.764   | 0.000 | NA    | 0.000 | 0.000 | 24  | 1.000 | 1     |
| Rub/EAM vs A.SG/Soft Coral | <i>Oxycheilinus unifasciatus</i>  | 0.000   | 0.764   | 0.000 | NA    | 0.000 | 0.000 | 29  | 1.000 | 1     |
| Rub/EAM vs A.SG/Soft Coral | <i>Pseudocheilinus hexataenia</i> | 0.000   | 0.764   | 0.000 | NA    | 0.000 | 0.000 | 35  | 1.000 | 1     |
| Rub/EAM vs A.SG/Soft Coral | <i>Pseudodax moluccanus</i>       | 0.000   | 0.764   | 0.000 | NA    | 0.000 | 0.000 | 42  | 1.000 | 1     |
| Rub/EAM vs A.SG/Soft Coral | <i>Stethojulis bandanensis</i>    | 0.012   | 0.764   | 0.041 | 0.288 | 0.024 | 0.000 | 43  | 1.000 | 0.504 |
| Rub/EAM vs A.SG/Soft Coral | <i>Stethojulis interrupta</i>     | 0.034   | 0.764   | 0.070 | 0.482 | 0.055 | 0.018 | 44  | 1.000 | 0.031 |
| Rub/EAM vs A.SG/Soft Coral | <i>Stethojulis strigiventer</i>   | 0.000   | 0.764   | 0.000 | NA    | 0.000 | 0.000 | 45  | 1.000 | 1     |
| Rub/EAM vs A.SG/Soft Coral | <i>Thalassoma amblycephalum</i>   | 0.000   | 0.764   | 0.000 | NA    | 0.000 | 0.000 | 48  | 1.000 | 1     |
| Rub/EAM vs A.SG/Soft Coral | <i>Thalassoma hardwicke</i>       | 0.000   | 0.764   | 0.000 | NA    | 0.000 | 0.000 | 49  | 1.000 | 1     |
| Rub/EAM vs A.SG/Soft Coral | <i>Thalassoma jansenii</i>        | 0.000   | 0.764   | 0.000 | NA    | 0.000 | 0.000 | 50  | 1.000 | 1     |
| Rub/EAM vs A.SG/Soft Coral | <i>Thalassoma lunare</i>          | 0.049   | 0.764   | 0.038 | 1.297 | 0.193 | 0.141 | 51  | 1.000 | 0.235 |
| Comparison                 | species                           | average | overall | sd    | ratio | ava   | avb   | ord | cusum | p     |
| Rub/EAM vs A.CR/A.RF       | <i>Anampses caeruleopunctatus</i> | 0.000   | 0.836   | 0.000 | NA    | 0.000 | 0.000 | 41  | 0.089 | 1     |
| Rub/EAM vs A.CR/A.RF       | <i>Anampses meleagrides</i>       | 0.000   | 0.836   | 0.000 | NA    | 0.000 | 0.000 | 52  | 0.171 | 1     |
| Rub/EAM vs A.CR/A.RF       | <i>Anampses sp.</i>               | 0.015   | 0.836   | 0.029 | 0.516 | 0.023 | 0.010 | 50  | 0.234 | 0.823 |
| Rub/EAM vs A.CR/A.RF       | <i>Anampses twistii</i>           | 0.011   | 0.836   | 0.038 | 0.301 | 0.000 | 0.023 | 6   | 0.296 | 0.561 |
| Rub/EAM vs A.CR/A.RF       | <i>Bodianus dictynna</i>          | 0.037   | 0.836   | 0.087 | 0.425 | 0.000 | 0.074 | 16  | 0.355 | 0.035 |
| Rub/EAM vs A.CR/A.RF       | <i>Bodianus mesothorax</i>        | 0.052   | 0.836   | 0.070 | 0.749 | 0.041 | 0.084 | 15  | 0.412 | 0.147 |
| Rub/EAM vs A.CR/A.RF       | <i>Bodianus sp.</i>               | 0.000   | 0.836   | 0.000 | NA    | 0.000 | 0.000 | 9   | 0.466 | 1     |
| Rub/EAM vs A.CR/A.RF       | <i>Cheilinus chlorourus</i>       | 0.019   | 0.836   | 0.050 | 0.381 | 0.010 | 0.030 | 21  | 0.515 | 0.689 |
| Rub/EAM vs A.CR/A.RF       | <i>Cheilinus fasciatus</i>        | 0.045   | 0.836   | 0.079 | 0.569 | 0.052 | 0.046 | 31  | 0.562 | 0.035 |
| Rub/EAM vs A.CR/A.RF       | <i>Cheilinus oxycephalus</i>      | 0.000   | 0.836   | 0.000 | NA    | 0.000 | 0.000 | 5   | 0.606 | 1     |
| Rub/EAM vs A.CR/A.RF       | <i>Cheilinus trilobatus</i>       | 0.025   | 0.836   | 0.055 | 0.450 | 0.041 | 0.012 | 37  | 0.647 | 0.844 |
| Rub/EAM vs A.CR/A.RF       | <i>Cheilio inermis</i>            | 0.018   | 0.836   | 0.059 | 0.301 | 0.000 | 0.035 | 39  | 0.684 | 0.781 |
| Rub/EAM vs A.CR/A.RF       | <i>Choerodon anchorago</i>        | 0.000   | 0.836   | 0.000 | NA    | 0.000 | 0.000 | 47  | 0.717 | 1     |
| Rub/EAM vs A.CR/A.RF       | <i>Choerodon sp.</i>              | 0.000   | 0.836   | 0.000 | NA    | 0.000 | 0.000 | 45  | 0.747 | 1     |
| Rub/EAM vs A.CR/A.RF       | <i>Coris batuensis</i>            | 0.048   | 0.836   | 0.068 | 0.699 | 0.096 | 0.000 | 28  | 0.778 | 0.178 |
| Rub/EAM vs A.CR/A.RF       | <i>Coris gaimard</i>              | 0.049   | 0.836   | 0.073 | 0.672 | 0.012 | 0.094 | 40  | 0.808 | 0.033 |
| Rub/EAM vs A.CR/A.RF       | <i>Epibulus brevis</i>            | 0.000   | 0.836   | 0.000 | NA    | 0.000 | 0.000 | 11  | 0.838 | 1     |

|                      |                                     |       |       |       |       |       |       |    |       |       |
|----------------------|-------------------------------------|-------|-------|-------|-------|-------|-------|----|-------|-------|
| Rub/EAM vs A.CR/A.RF | <i>Epibulus insidiator</i>          | 0.000 | 0.836 | 0.000 | NA    | 0.000 | 0.000 | 19 | 0.865 | 1     |
| Rub/EAM vs A.CR/A.RF | <i>Gomphosus varius</i>             | 0.023 | 0.836 | 0.055 | 0.418 | 0.000 | 0.046 | 30 | 0.888 | 0.133 |
| Rub/EAM vs A.CR/A.RF | <i>Halichoeres chrysus</i>          | 0.000 | 0.836 | 0.000 | NA    | 0.000 | 0.000 | 8  | 0.911 | 1     |
| Rub/EAM vs A.CR/A.RF | <i>Halichoeres hortulanus</i>       | 0.041 | 0.836 | 0.063 | 0.649 | 0.010 | 0.078 | 12 | 0.932 | 0.35  |
| Rub/EAM vs A.CR/A.RF | <i>Halichoeres marginatus</i>       | 0.000 | 0.836 | 0.000 | NA    | 0.000 | 0.000 | 3  | 0.950 | 1     |
| Rub/EAM vs A.CR/A.RF | <i>Halichoeres melanurus</i>        | 0.000 | 0.836 | 0.000 | NA    | 0.000 | 0.000 | 46 | 0.964 | 1     |
| Rub/EAM vs A.CR/A.RF | <i>Halichoeres nigrescens</i>       | 0.000 | 0.836 | 0.000 | NA    | 0.000 | 0.000 | 4  | 0.978 | 1     |
| Rub/EAM vs A.CR/A.RF | <i>Halichoeres podostigma</i>       | 0.000 | 0.836 | 0.000 | NA    | 0.000 | 0.000 | 27 | 0.991 | 1     |
| Rub/EAM vs A.CR/A.RF | <i>Halichoeres prosopeion</i>       | 0.008 | 0.836 | 0.026 | 0.301 | 0.000 | 0.015 | 26 | 1.000 | 0.777 |
| Rub/EAM vs A.CR/A.RF | <i>Halichoeres richmondi</i>        | 0.011 | 0.836 | 0.036 | 0.301 | 0.000 | 0.022 | 1  | 1.000 | 0.438 |
| Rub/EAM vs A.CR/A.RF | <i>Halichoeres scapularis</i>       | 0.025 | 0.836 | 0.049 | 0.525 | 0.051 | 0.000 | 2  | 1.000 | 0.625 |
| Rub/EAM vs A.CR/A.RF | <i>Halichoeres sp.</i>              | 0.000 | 0.836 | 0.000 | NA    | 0.000 | 0.000 | 7  | 1.000 | 1     |
| Rub/EAM vs A.CR/A.RF | <i>Hemigymnus fasciatus</i>         | 0.019 | 0.836 | 0.037 | 0.519 | 0.030 | 0.012 | 10 | 1.000 | 0.333 |
| Rub/EAM vs A.CR/A.RF | <i>Hemigymnus melapterus</i>        | 0.039 | 0.836 | 0.084 | 0.465 | 0.078 | 0.000 | 13 | 1.000 | 0.154 |
| Rub/EAM vs A.CR/A.RF | <i>Hologymnosus annulatus</i>       | 0.000 | 0.836 | 0.000 | NA    | 0.000 | 0.000 | 14 | 1.000 | 1     |
| Rub/EAM vs A.CR/A.RF | <i>Hologymnosus sp.</i>             | 0.000 | 0.836 | 0.000 | NA    | 0.000 | 0.000 | 17 | 1.000 | 1     |
| Rub/EAM vs A.CR/A.RF | <i>Labrichthys unilineatus</i>      | 0.000 | 0.836 | 0.000 | NA    | 0.000 | 0.000 | 18 | 1.000 | 1     |
| Rub/EAM vs A.CR/A.RF | <i>Labropsis manabei</i>            | 0.000 | 0.836 | 0.000 | NA    | 0.000 | 0.000 | 20 | 1.000 | 1     |
| Rub/EAM vs A.CR/A.RF | <i>Labropsis xanthonota</i>         | 0.000 | 0.836 | 0.000 | NA    | 0.000 | 0.000 | 22 | 1.000 | 1     |
| Rub/EAM vs A.CR/A.RF | <i>Macropharyngodon meleagris</i>   | 0.034 | 0.836 | 0.067 | 0.506 | 0.046 | 0.030 | 23 | 1.000 | 0.298 |
| Rub/EAM vs A.CR/A.RF | <i>Macropharyngodon negrosensis</i> | 0.000 | 0.836 | 0.000 | NA    | 0.000 | 0.000 | 24 | 1.000 | 1     |
| Rub/EAM vs A.CR/A.RF | <i>Novaculichthys taeniourus</i>    | 0.031 | 0.836 | 0.065 | 0.477 | 0.054 | 0.012 | 25 | 1.000 | 0.099 |
| Rub/EAM vs A.CR/A.RF | <i>Oxycheilinus celebicus</i>       | 0.025 | 0.836 | 0.087 | 0.288 | 0.050 | 0.000 | 29 | 1.000 | 0.216 |
| Rub/EAM vs A.CR/A.RF | <i>Oxycheilinus digramma</i>        | 0.074 | 0.836 | 0.075 | 0.995 | 0.135 | 0.047 | 32 | 1.000 | 0.091 |
| Rub/EAM vs A.CR/A.RF | <i>Oxycheilinus sp.</i>             | 0.000 | 0.836 | 0.000 | NA    | 0.000 | 0.000 | 33 | 1.000 | 1     |
| Rub/EAM vs A.CR/A.RF | <i>Oxycheilinus unifasciatus</i>    | 0.000 | 0.836 | 0.000 | NA    | 0.000 | 0.000 | 34 | 1.000 | 1     |
| Rub/EAM vs A.CR/A.RF | <i>Pseudocheilinus hexataenia</i>   | 0.000 | 0.836 | 0.000 | NA    | 0.000 | 0.000 | 35 | 1.000 | 1     |
| Rub/EAM vs A.CR/A.RF | <i>Pseudodax moluccanus</i>         | 0.026 | 0.836 | 0.086 | 0.301 | 0.000 | 0.051 | 36 | 1.000 | 0.11  |
| Rub/EAM vs A.CR/A.RF | <i>Stethojulis bandanensis</i>      | 0.012 | 0.836 | 0.042 | 0.288 | 0.024 | 0.000 | 38 | 1.000 | 0.532 |
| Rub/EAM vs A.CR/A.RF | <i>Stethojulis interrupta</i>       | 0.027 | 0.836 | 0.068 | 0.404 | 0.055 | 0.000 | 42 | 1.000 | 0.17  |
| Rub/EAM vs A.CR/A.RF | <i>Stethojulis strigiventer</i>     | 0.000 | 0.836 | 0.000 | NA    | 0.000 | 0.000 | 43 | 1.000 | 1     |

| Rub/EAM vs A.CR/A.RF          | <i>Thalassoma amblycephalum</i>   | 0.000   | 0.836   | 0.000 | NA    | 0.000 | 0.000 | 44  | 1.000 | 1     |
|-------------------------------|-----------------------------------|---------|---------|-------|-------|-------|-------|-----|-------|-------|
| Rub/EAM vs A.CR/A.RF          | <i>Thalassoma hardwicke</i>       | 0.052   | 0.836   | 0.093 | 0.567 | 0.000 | 0.105 | 48  | 1.000 | 0.091 |
| Rub/EAM vs A.CR/A.RF          | <i>Thalassoma janseni</i>         | 0.000   | 0.836   | 0.000 | NA    | 0.000 | 0.000 | 49  | 1.000 | 1     |
| Rub/EAM vs A.CR/A.RF          | <i>Thalassoma lunare</i>          | 0.069   | 0.836   | 0.050 | 1.361 | 0.193 | 0.173 | 51  | 1.000 | 0.002 |
| Comparison                    | species                           | average | overall | sd    | ratio | ava   | avb   | ord | cusum | p     |
| Coral.A.MA vs A.SG/Soft Coral | <i>Anampses caeruleopunctatus</i> | 0.002   | 0.800   | 0.011 | 0.180 | 0.004 | 0.000 | 41  | 0.077 | 0.55  |
| Coral.A.MA vs A.SG/Soft Coral | <i>Anampses meleagrides</i>       | 0.002   | 0.800   | 0.013 | 0.180 | 0.005 | 0.000 | 6   | 0.144 | 0.797 |
| Coral.A.MA vs A.SG/Soft Coral | <i>Anampses sp.</i>               | 0.008   | 0.800   | 0.028 | 0.277 | 0.000 | 0.015 | 14  | 0.207 | 1     |
| Coral.A.MA vs A.SG/Soft Coral | <i>Anampses twistii</i>           | 0.018   | 0.800   | 0.054 | 0.340 | 0.024 | 0.014 | 50  | 0.265 | 0.16  |
| Coral.A.MA vs A.SG/Soft Coral | <i>Bodianus dictynna</i>          | 0.000   | 0.800   | 0.000 | NA    | 0.000 | 0.000 | 15  | 0.319 | 1     |
| Coral.A.MA vs A.SG/Soft Coral | <i>Bodianus mesothorax</i>        | 0.054   | 0.800   | 0.043 | 1.253 | 0.106 | 0.016 | 11  | 0.370 | 0.001 |
| Coral.A.MA vs A.SG/Soft Coral | <i>Bodianus sp.</i>               | 0.002   | 0.800   | 0.013 | 0.180 | 0.005 | 0.000 | 12  | 0.419 | 0.526 |
| Coral.A.MA vs A.SG/Soft Coral | <i>Cheilinus chlorourus</i>       | 0.018   | 0.800   | 0.044 | 0.414 | 0.013 | 0.026 | 34  | 0.466 | 0.902 |
| Coral.A.MA vs A.SG/Soft Coral | <i>Cheilinus fasciatus</i>        | 0.012   | 0.800   | 0.037 | 0.331 | 0.000 | 0.025 | 21  | 0.507 | 0.854 |
| Coral.A.MA vs A.SG/Soft Coral | <i>Cheilinus oxycephalus</i>      | 0.016   | 0.800   | 0.032 | 0.497 | 0.029 | 0.004 | 52  | 0.546 | 0.043 |
| Coral.A.MA vs A.SG/Soft Coral | <i>Cheilinus trilobatus</i>       | 0.041   | 0.800   | 0.065 | 0.639 | 0.007 | 0.079 | 28  | 0.580 | 0.311 |
| Coral.A.MA vs A.SG/Soft Coral | <i>Cheilio inermis</i>            | 0.039   | 0.800   | 0.063 | 0.618 | 0.008 | 0.075 | 37  | 0.611 | 0.032 |
| Coral.A.MA vs A.SG/Soft Coral | <i>Choerodon anchorago</i>        | 0.003   | 0.800   | 0.014 | 0.180 | 0.005 | 0.000 | 26  | 0.637 | 0.547 |
| Coral.A.MA vs A.SG/Soft Coral | <i>Choerodon sp.</i>              | 0.050   | 0.800   | 0.064 | 0.785 | 0.000 | 0.100 | 17  | 0.661 | 0.001 |
| Coral.A.MA vs A.SG/Soft Coral | <i>Coris batuensis</i>            | 0.043   | 0.800   | 0.055 | 0.772 | 0.014 | 0.081 | 4   | 0.684 | 0.244 |
| Coral.A.MA vs A.SG/Soft Coral | <i>Coris gaimard</i>              | 0.008   | 0.800   | 0.025 | 0.321 | 0.010 | 0.007 | 8   | 0.706 | 0.999 |
| Coral.A.MA vs A.SG/Soft Coral | <i>Epibulus brevis</i>            | 0.019   | 0.800   | 0.045 | 0.429 | 0.018 | 0.023 | 25  | 0.729 | 0.01  |
| Coral.A.MA vs A.SG/Soft Coral | <i>Epibulus insidiator</i>        | 0.005   | 0.800   | 0.020 | 0.257 | 0.010 | 0.000 | 27  | 0.749 | 0.295 |
| Coral.A.MA vs A.SG/Soft Coral | <i>Gomphosus varius</i>           | 0.012   | 0.800   | 0.028 | 0.422 | 0.024 | 0.000 | 10  | 0.769 | 0.684 |
| Coral.A.MA vs A.SG/Soft Coral | <i>Halichoeres chrysus</i>        | 0.000   | 0.800   | 0.000 | NA    | 0.000 | 0.000 | 30  | 0.787 | 1     |
| Coral.A.MA vs A.SG/Soft Coral | <i>Halichoeres hortulanus</i>     | 0.033   | 0.800   | 0.046 | 0.716 | 0.048 | 0.031 | 46  | 0.805 | 0.795 |
| Coral.A.MA vs A.SG/Soft Coral | <i>Halichoeres marginatus</i>     | 0.007   | 0.800   | 0.027 | 0.257 | 0.014 | 0.000 | 23  | 0.822 | 0.306 |
| Coral.A.MA vs A.SG/Soft Coral | <i>Halichoeres melanurus</i>      | 0.014   | 0.800   | 0.030 | 0.465 | 0.015 | 0.016 | 31  | 0.838 | 0.014 |
| Coral.A.MA vs A.SG/Soft Coral | <i>Halichoeres nigrescens</i>     | 0.003   | 0.800   | 0.015 | 0.180 | 0.005 | 0.000 | 9   | 0.854 | 0.566 |
| Coral.A.MA vs A.SG/Soft Coral | <i>Halichoeres podostigma</i>     | 0.018   | 0.800   | 0.035 | 0.509 | 0.013 | 0.027 | 19  | 0.869 | 0.008 |
| Coral.A.MA vs A.SG/Soft Coral | <i>Halichoeres prosopeion</i>     | 0.021   | 0.800   | 0.042 | 0.498 | 0.022 | 0.024 | 39  | 0.881 | 0.205 |

|                               |                                     |         |         |       |       |       |       |     |       |       |
|-------------------------------|-------------------------------------|---------|---------|-------|-------|-------|-------|-----|-------|-------|
| Coral.A.MA vs A.SG/Soft Coral | <i>Halichoeres richmondi</i>        | 0.016   | 0.800   | 0.043 | 0.370 | 0.013 | 0.021 | 47  | 0.892 | 0.156 |
| Coral.A.MA vs A.SG/Soft Coral | <i>Halichoeres scapularis</i>       | 0.027   | 0.800   | 0.049 | 0.552 | 0.000 | 0.054 | 16  | 0.902 | 0.743 |
| Coral.A.MA vs A.SG/Soft Coral | <i>Halichoeres sp.</i>              | 0.005   | 0.800   | 0.021 | 0.258 | 0.011 | 0.000 | 3   | 0.912 | 0.302 |
| Coral.A.MA vs A.SG/Soft Coral | <i>Hemigymnus fasciatus</i>         | 0.015   | 0.800   | 0.033 | 0.449 | 0.029 | 0.000 | 36  | 0.921 | 0.629 |
| Coral.A.MA vs A.SG/Soft Coral | <i>Hemigymnus melapterus</i>        | 0.013   | 0.800   | 0.030 | 0.424 | 0.025 | 0.000 | 40  | 0.930 | 0.967 |
| Coral.A.MA vs A.SG/Soft Coral | <i>Hologymnosus annulatus</i>       | 0.003   | 0.800   | 0.016 | 0.192 | 0.000 | 0.006 | 22  | 0.938 | 0.251 |
| Coral.A.MA vs A.SG/Soft Coral | <i>Hologymnosus sp.</i>             | 0.002   | 0.800   | 0.012 | 0.192 | 0.000 | 0.005 | 29  | 0.945 | 0.894 |
| Coral.A.MA vs A.SG/Soft Coral | <i>Labrichthys unilineatus</i>      | 0.038   | 0.800   | 0.042 | 0.900 | 0.074 | 0.007 | 44  | 0.952 | 0.001 |
| Coral.A.MA vs A.SG/Soft Coral | <i>Labropsis manabei</i>            | 0.003   | 0.800   | 0.016 | 0.180 | 0.006 | 0.000 | 18  | 0.958 | 0.533 |
| Coral.A.MA vs A.SG/Soft Coral | <i>Labropsis xanthonota</i>         | 0.007   | 0.800   | 0.026 | 0.277 | 0.000 | 0.014 | 42  | 0.963 | 0.059 |
| Coral.A.MA vs A.SG/Soft Coral | <i>Macropharyngodon meleagris</i>   | 0.025   | 0.800   | 0.040 | 0.621 | 0.042 | 0.013 | 48  | 0.968 | 0.695 |
| Coral.A.MA vs A.SG/Soft Coral | <i>Macropharyngodon negrosensis</i> | 0.004   | 0.800   | 0.019 | 0.192 | 0.000 | 0.007 | 38  | 0.973 | 0.425 |
| Coral.A.MA vs A.SG/Soft Coral | <i>Novaculichthys taeniourus</i>    | 0.010   | 0.800   | 0.030 | 0.335 | 0.000 | 0.020 | 32  | 0.977 | 0.873 |
| Coral.A.MA vs A.SG/Soft Coral | <i>Oxycheilinus celebicus</i>       | 0.007   | 0.800   | 0.025 | 0.277 | 0.000 | 0.014 | 35  | 0.980 | 0.589 |
| Coral.A.MA vs A.SG/Soft Coral | <i>Oxycheilinus digramma</i>        | 0.062   | 0.800   | 0.045 | 1.368 | 0.138 | 0.116 | 24  | 0.983 | 0.629 |
| Coral.A.MA vs A.SG/Soft Coral | <i>Oxycheilinus sp.</i>             | 0.004   | 0.800   | 0.017 | 0.257 | 0.009 | 0.000 | 13  | 0.986 | 0.314 |
| Coral.A.MA vs A.SG/Soft Coral | <i>Oxycheilinus unifasciatus</i>    | 0.000   | 0.800   | 0.000 | NA    | 0.000 | 0.000 | 33  | 0.989 | 1     |
| Coral.A.MA vs A.SG/Soft Coral | <i>Pseudocheilinus hexataenia</i>   | 0.005   | 0.800   | 0.021 | 0.256 | 0.011 | 0.000 | 2   | 0.992 | 0.305 |
| Coral.A.MA vs A.SG/Soft Coral | <i>Pseudodax moluccanus</i>         | 0.000   | 0.800   | 0.000 | NA    | 0.000 | 0.000 | 7   | 0.995 | 1     |
| Coral.A.MA vs A.SG/Soft Coral | <i>Stethojulis bandanensis</i>      | 0.015   | 0.800   | 0.035 | 0.414 | 0.029 | 0.000 | 1   | 0.998 | 0.297 |
| Coral.A.MA vs A.SG/Soft Coral | <i>Stethojulis interrupta</i>       | 0.009   | 0.800   | 0.032 | 0.277 | 0.000 | 0.018 | 49  | 1.000 | 0.918 |
| Coral.A.MA vs A.SG/Soft Coral | <i>Stethojulis strigiventer</i>     | 0.004   | 0.800   | 0.021 | 0.180 | 0.007 | 0.000 | 5   | 1.000 | 0.547 |
| Coral.A.MA vs A.SG/Soft Coral | <i>Thalassoma amblycephalum</i>     | 0.002   | 0.800   | 0.010 | 0.180 | 0.004 | 0.000 | 20  | 1.000 | 0.559 |
| Coral.A.MA vs A.SG/Soft Coral | <i>Thalassoma hardwicke</i>         | 0.046   | 0.800   | 0.042 | 1.102 | 0.093 | 0.000 | 43  | 1.000 | 0.008 |
| Coral.A.MA vs A.SG/Soft Coral | <i>Thalassoma janseni</i>           | 0.000   | 0.800   | 0.000 | NA    | 0.000 | 0.000 | 45  | 1.000 | 1     |
| Coral.A.MA vs A.SG/Soft Coral | <i>Thalassoma lunare</i>            | 0.031   | 0.800   | 0.025 | 1.266 | 0.113 | 0.141 | 51  | 1.000 | 1     |
| Comparison                    | species                             | average | overall | sd    | ratio | ava   | avb   | ord | cusum | p     |
| Coral/A.MA vs A.CR/A.RF       | <i>Anampses caeruleopunctatus</i>   | 0.002   | 0.807   | 0.011 | 0.179 | 0.004 | 0.000 | 41  | 0.091 | 0.416 |
| Coral/A.MA vs A.CR/A.RF       | <i>Anampses meleagrides</i>         | 0.002   | 0.807   | 0.013 | 0.179 | 0.005 | 0.000 | 50  | 0.178 | 0.686 |
| Coral/A.MA vs A.CR/A.RF       | <i>Anampses sp.</i>                 | 0.005   | 0.807   | 0.017 | 0.301 | 0.000 | 0.010 | 52  | 0.258 | 0.997 |
| Coral/A.MA vs A.CR/A.RF       | <i>Anampses twistii</i>             | 0.022   | 0.807   | 0.053 | 0.413 | 0.024 | 0.023 | 6   | 0.334 | 0.165 |

|                         |                                |       |       |       |       |       |       |    |       |       |
|-------------------------|--------------------------------|-------|-------|-------|-------|-------|-------|----|-------|-------|
| Coral/A.MA vs A.CR/A.RF | <i>Bodianus dictynna</i>       | 0.037 | 0.807 | 0.086 | 0.426 | 0.000 | 0.074 | 16 | 0.395 | 0.014 |
| Coral/A.MA vs A.CR/A.RF | <i>Bodianus mesothorax</i>     | 0.062 | 0.807 | 0.052 | 1.200 | 0.106 | 0.084 | 21 | 0.455 | 0.006 |
| Coral/A.MA vs A.CR/A.RF | <i>Bodianus sp.</i>            | 0.002 | 0.807 | 0.013 | 0.179 | 0.005 | 0.000 | 5  | 0.501 | 0.384 |
| Coral/A.MA vs A.CR/A.RF | <i>Cheilinus chlorourus</i>    | 0.020 | 0.807 | 0.053 | 0.381 | 0.013 | 0.030 | 34 | 0.546 | 0.715 |
| Coral/A.MA vs A.CR/A.RF | <i>Cheilinus fasciatus</i>     | 0.023 | 0.807 | 0.077 | 0.301 | 0.000 | 0.046 | 37 | 0.586 | 0.295 |
| Coral/A.MA vs A.CR/A.RF | <i>Cheilinus oxycephalus</i>   | 0.014 | 0.807 | 0.031 | 0.460 | 0.029 | 0.000 | 19 | 0.625 | 0.223 |
| Coral/A.MA vs A.CR/A.RF | <i>Cheilinus trilobatus</i>    | 0.009 | 0.807 | 0.023 | 0.395 | 0.007 | 0.012 | 45 | 0.657 | 0.997 |
| Coral/A.MA vs A.CR/A.RF | <i>Cheilio inermis</i>         | 0.021 | 0.807 | 0.060 | 0.346 | 0.008 | 0.035 | 9  | 0.685 | 0.736 |
| Coral/A.MA vs A.CR/A.RF | <i>Choerodon anchorago</i>     | 0.003 | 0.807 | 0.014 | 0.179 | 0.005 | 0.000 | 4  | 0.712 | 0.414 |
| Coral/A.MA vs A.CR/A.RF | <i>Choerodon sp.</i>           | 0.000 | 0.807 | 0.000 | NA    | 0.000 | 0.000 | 12 | 0.738 | 1     |
| Coral/A.MA vs A.CR/A.RF | <i>Coris batuensis</i>         | 0.007 | 0.807 | 0.022 | 0.315 | 0.014 | 0.000 | 8  | 0.763 | 1     |
| Coral/A.MA vs A.CR/A.RF | <i>Coris gaimard</i>           | 0.049 | 0.807 | 0.073 | 0.666 | 0.010 | 0.094 | 30 | 0.786 | 0.017 |
| Coral/A.MA vs A.CR/A.RF | <i>Epibulus brevis</i>         | 0.009 | 0.807 | 0.024 | 0.377 | 0.018 | 0.000 | 26 | 0.807 | 0.557 |
| Coral/A.MA vs A.CR/A.RF | <i>Epibulus insidiator</i>     | 0.005 | 0.807 | 0.020 | 0.257 | 0.010 | 0.000 | 27 | 0.827 | 0.294 |
| Coral/A.MA vs A.CR/A.RF | <i>Gomphosus varius</i>        | 0.031 | 0.807 | 0.055 | 0.567 | 0.024 | 0.046 | 46 | 0.845 | 0.018 |
| Coral/A.MA vs A.CR/A.RF | <i>Halichoeres chrysus</i>     | 0.000 | 0.807 | 0.000 | NA    | 0.000 | 0.000 | 10 | 0.863 | 1     |
| Coral/A.MA vs A.CR/A.RF | <i>Halichoeres hortulanus</i>  | 0.048 | 0.807 | 0.060 | 0.810 | 0.048 | 0.078 | 31 | 0.879 | 0.074 |
| Coral/A.MA vs A.CR/A.RF | <i>Halichoeres marginatus</i>  | 0.007 | 0.807 | 0.027 | 0.256 | 0.014 | 0.000 | 11 | 0.890 | 0.302 |
| Coral/A.MA vs A.CR/A.RF | <i>Halichoeres melanurus</i>   | 0.008 | 0.807 | 0.024 | 0.317 | 0.015 | 0.000 | 17 | 0.901 | 0.527 |
| Coral/A.MA vs A.CR/A.RF | <i>Halichoeres nigrescens</i>  | 0.003 | 0.807 | 0.015 | 0.179 | 0.005 | 0.000 | 23 | 0.911 | 0.411 |
| Coral/A.MA vs A.CR/A.RF | <i>Halichoeres podostigma</i>  | 0.006 | 0.807 | 0.020 | 0.317 | 0.013 | 0.000 | 15 | 0.919 | 0.796 |
| Coral/A.MA vs A.CR/A.RF | <i>Halichoeres prosopeion</i>  | 0.017 | 0.807 | 0.035 | 0.475 | 0.022 | 0.015 | 22 | 0.928 | 0.46  |
| Coral/A.MA vs A.CR/A.RF | <i>Halichoeres richmondi</i>   | 0.016 | 0.807 | 0.041 | 0.394 | 0.013 | 0.022 | 25 | 0.936 | 0.238 |
| Coral/A.MA vs A.CR/A.RF | <i>Halichoeres scapularis</i>  | 0.000 | 0.807 | 0.000 | NA    | 0.000 | 0.000 | 39 | 0.943 | 1     |
| Coral/A.MA vs A.CR/A.RF | <i>Halichoeres sp.</i>         | 0.005 | 0.807 | 0.021 | 0.258 | 0.011 | 0.000 | 29 | 0.950 | 0.316 |
| Coral/A.MA vs A.CR/A.RF | <i>Hemigymnus fasciatus</i>    | 0.019 | 0.807 | 0.035 | 0.540 | 0.029 | 0.012 | 44 | 0.957 | 0.33  |
| Coral/A.MA vs A.CR/A.RF | <i>Hemigymnus melapterus</i>   | 0.013 | 0.807 | 0.030 | 0.423 | 0.025 | 0.000 | 3  | 0.963 | 0.884 |
| Coral/A.MA vs A.CR/A.RF | <i>Hologymnosus annulatus</i>  | 0.000 | 0.807 | 0.000 | NA    | 0.000 | 0.000 | 18 | 0.970 | 1     |
| Coral/A.MA vs A.CR/A.RF | <i>Hologymnosus sp.</i>        | 0.000 | 0.807 | 0.000 | NA    | 0.000 | 0.000 | 42 | 0.975 | 1     |
| Coral/A.MA vs A.CR/A.RF | <i>Labrichthys unilineatus</i> | 0.037 | 0.807 | 0.042 | 0.879 | 0.074 | 0.000 | 48 | 0.980 | 0.017 |
| Coral/A.MA vs A.CR/A.RF | <i>Labropsis manabei</i>       | 0.003 | 0.807 | 0.016 | 0.179 | 0.006 | 0.000 | 35 | 0.983 | 0.412 |

| Coral/A.MA vs A.CR/A.RF      | <i>Labropsis xanthonota</i>         | 0.000   | 0.807   | 0.000 | NA    | 0.000 | 0.000 | 24  | 0.986 | 1     |
|------------------------------|-------------------------------------|---------|---------|-------|-------|-------|-------|-----|-------|-------|
| Coral/A.MA vs A.CR/A.RF      | <i>Macropharyngodon meleagris</i>   | 0.032   | 0.807   | 0.053 | 0.607 | 0.042 | 0.030 | 13  | 0.990 | 0.293 |
| Coral/A.MA vs A.CR/A.RF      | <i>Macropharyngodon negrosensis</i> | 0.000   | 0.807   | 0.000 | NA    | 0.000 | 0.000 | 2   | 0.992 | 1     |
| Coral/A.MA vs A.CR/A.RF      | <i>Novaculichthys taeniourus</i>    | 0.006   | 0.807   | 0.021 | 0.301 | 0.000 | 0.012 | 7   | 0.995 | 0.902 |
| Coral/A.MA vs A.CR/A.RF      | <i>Oxycheilinus celebicus</i>       | 0.000   | 0.807   | 0.000 | NA    | 0.000 | 0.000 | 1   | 0.998 | 1     |
| Coral/A.MA vs A.CR/A.RF      | <i>Oxycheilinus digramma</i>        | 0.073   | 0.807   | 0.052 | 1.418 | 0.138 | 0.047 | 49  | 1.000 | 0.071 |
| Coral/A.MA vs A.CR/A.RF      | <i>Oxycheilinus sp.</i>             | 0.004   | 0.807   | 0.017 | 0.257 | 0.009 | 0.000 | 14  | 1.000 | 0.314 |
| Coral/A.MA vs A.CR/A.RF      | <i>Oxycheilinus unifasciatus</i>    | 0.000   | 0.807   | 0.000 | NA    | 0.000 | 0.000 | 20  | 1.000 | 1     |
| Coral/A.MA vs A.CR/A.RF      | <i>Pseudocheilinus hexataenia</i>   | 0.005   | 0.807   | 0.021 | 0.255 | 0.011 | 0.000 | 28  | 1.000 | 0.302 |
| Coral/A.MA vs A.CR/A.RF      | <i>Pseudodax moluccanus</i>         | 0.026   | 0.807   | 0.085 | 0.301 | 0.000 | 0.051 | 32  | 1.000 | 0.11  |
| Coral/A.MA vs A.CR/A.RF      | <i>Stethojulis bandanensis</i>      | 0.015   | 0.807   | 0.035 | 0.414 | 0.029 | 0.000 | 33  | 1.000 | 0.334 |
| Coral/A.MA vs A.CR/A.RF      | <i>Stethojulis interrupta</i>       | 0.000   | 0.807   | 0.000 | NA    | 0.000 | 0.000 | 36  | 1.000 | 1     |
| Coral/A.MA vs A.CR/A.RF      | <i>Stethojulis strigiventer</i>     | 0.004   | 0.807   | 0.021 | 0.179 | 0.007 | 0.000 | 38  | 1.000 | 0.388 |
| Coral/A.MA vs A.CR/A.RF      | <i>Thalassoma amblycephalum</i>     | 0.002   | 0.807   | 0.010 | 0.179 | 0.004 | 0.000 | 40  | 1.000 | 0.423 |
| Coral/A.MA vs A.CR/A.RF      | <i>Thalassoma hardwicke</i>         | 0.071   | 0.807   | 0.073 | 0.966 | 0.093 | 0.105 | 43  | 1.000 | 0.001 |
| Coral/A.MA vs A.CR/A.RF      | <i>Thalassoma janseni</i>           | 0.000   | 0.807   | 0.000 | NA    | 0.000 | 0.000 | 47  | 1.000 | 1     |
| Coral/A.MA vs A.CR/A.RF      | <i>Thalassoma lunare</i>            | 0.064   | 0.807   | 0.045 | 1.418 | 0.113 | 0.173 | 51  | 1.000 | 0.001 |
| Comparison                   | species                             | average | overall | sd    | ratio | ava   | avb   | ord | cusum | p     |
| A.SG/Soft Coral vs A.CR/A.RF | <i>Anampses caeruleopunctatus</i>   | 0.000   | 0.851   | 0.000 | NA    | 0.000 | 0.000 | 41  | 0.078 | 1     |
| A.SG/Soft Coral vs A.CR/A.RF | <i>Anampses meleagrides</i>         | 0.000   | 0.851   | 0.000 | NA    | 0.000 | 0.000 | 52  | 0.148 | 1     |
| A.SG/Soft Coral vs A.CR/A.RF | <i>Anampses sp.</i>                 | 0.012   | 0.851   | 0.031 | 0.398 | 0.015 | 0.010 | 50  | 0.209 | 0.952 |
| A.SG/Soft Coral vs A.CR/A.RF | <i>Anampses twistii</i>             | 0.018   | 0.851   | 0.050 | 0.353 | 0.014 | 0.023 | 14  | 0.268 | 0.324 |
| A.SG/Soft Coral vs A.CR/A.RF | <i>Bodianus dictynna</i>            | 0.037   | 0.851   | 0.086 | 0.426 | 0.000 | 0.074 | 12  | 0.326 | 0.016 |
| A.SG/Soft Coral vs A.CR/A.RF | <i>Bodianus mesothorax</i>          | 0.045   | 0.851   | 0.067 | 0.678 | 0.016 | 0.084 | 16  | 0.382 | 0.29  |
| A.SG/Soft Coral vs A.CR/A.RF | <i>Bodianus sp.</i>                 | 0.000   | 0.851   | 0.000 | NA    | 0.000 | 0.000 | 21  | 0.437 | 1     |
| A.SG/Soft Coral vs A.CR/A.RF | <i>Cheilinus chlorourus</i>         | 0.026   | 0.851   | 0.057 | 0.449 | 0.026 | 0.030 | 6   | 0.490 | 0.474 |
| A.SG/Soft Coral vs A.CR/A.RF | <i>Cheilinus fasciatus</i>          | 0.033   | 0.851   | 0.079 | 0.421 | 0.025 | 0.046 | 11  | 0.540 | 0.094 |
| A.SG/Soft Coral vs A.CR/A.RF | <i>Cheilinus oxycephalus</i>        | 0.002   | 0.851   | 0.012 | 0.192 | 0.004 | 0.000 | 15  | 0.587 | 0.969 |
| A.SG/Soft Coral vs A.CR/A.RF | <i>Cheilinus trilobatus</i>         | 0.042   | 0.851   | 0.064 | 0.658 | 0.079 | 0.012 | 5   | 0.631 | 0.349 |
| A.SG/Soft Coral vs A.CR/A.RF | <i>Cheilio inermis</i>              | 0.049   | 0.851   | 0.074 | 0.663 | 0.075 | 0.035 | 9   | 0.670 | 0.026 |
| A.SG/Soft Coral vs A.CR/A.RF | <i>Choerodon anchorago</i>          | 0.000   | 0.851   | 0.000 | NA    | 0.000 | 0.000 | 28  | 0.701 | 1     |



|                              |                                     |       |       |       |       |       |       |    |       |       |
|------------------------------|-------------------------------------|-------|-------|-------|-------|-------|-------|----|-------|-------|
| A.SG/Soft Coral vs A.CR/A.RF | <i>Choerodon sp.</i>                | 0.050 | 0.851 | 0.064 | 0.784 | 0.100 | 0.000 | 45 | 0.732 | 0.01  |
| A.SG/Soft Coral vs A.CR/A.RF | <i>Coris batuensis</i>              | 0.041 | 0.851 | 0.057 | 0.711 | 0.081 | 0.000 | 8  | 0.762 | 0.368 |
| A.SG/Soft Coral vs A.CR/A.RF | <i>Coris gaimard</i>                | 0.048 | 0.851 | 0.074 | 0.653 | 0.007 | 0.094 | 19 | 0.789 | 0.021 |
| A.SG/Soft Coral vs A.CR/A.RF | <i>Epibulus brevis</i>              | 0.012 | 0.851 | 0.043 | 0.272 | 0.023 | 0.000 | 37 | 0.813 | 0.463 |
| A.SG/Soft Coral vs A.CR/A.RF | <i>Epibulus insidiator</i>          | 0.000 | 0.851 | 0.000 | NA    | 0.000 | 0.000 | 27 | 0.836 | 1     |
| A.SG/Soft Coral vs A.CR/A.RF | <i>Gomphosus varius</i>             | 0.023 | 0.851 | 0.055 | 0.419 | 0.000 | 0.046 | 26 | 0.857 | 0.102 |
| A.SG/Soft Coral vs A.CR/A.RF | <i>Halichoeres chrysus</i>          | 0.000 | 0.851 | 0.000 | NA    | 0.000 | 0.000 | 4  | 0.878 | 1     |
| A.SG/Soft Coral vs A.CR/A.RF | <i>Halichoeres hortulanus</i>       | 0.046 | 0.851 | 0.064 | 0.723 | 0.031 | 0.078 | 39 | 0.896 | 0.111 |
| A.SG/Soft Coral vs A.CR/A.RF | <i>Halichoeres marginatus</i>       | 0.000 | 0.851 | 0.000 | NA    | 0.000 | 0.000 | 25 | 0.911 | 1     |
| A.SG/Soft Coral vs A.CR/A.RF | <i>Halichoeres melanurus</i>        | 0.008 | 0.851 | 0.023 | 0.338 | 0.016 | 0.000 | 3  | 0.926 | 0.534 |
| A.SG/Soft Coral vs A.CR/A.RF | <i>Halichoeres nigrescens</i>       | 0.000 | 0.851 | 0.000 | NA    | 0.000 | 0.000 | 17 | 0.939 | 1     |
| A.SG/Soft Coral vs A.CR/A.RF | <i>Halichoeres podostigma</i>       | 0.013 | 0.851 | 0.033 | 0.399 | 0.027 | 0.000 | 47 | 0.950 | 0.362 |
| A.SG/Soft Coral vs A.CR/A.RF | <i>Halichoeres prosopeion</i>       | 0.018 | 0.851 | 0.040 | 0.450 | 0.024 | 0.015 | 23 | 0.959 | 0.402 |
| A.SG/Soft Coral vs A.CR/A.RF | <i>Halichoeres richmondi</i>        | 0.020 | 0.851 | 0.048 | 0.407 | 0.021 | 0.022 | 36 | 0.967 | 0.143 |
| A.SG/Soft Coral vs A.CR/A.RF | <i>Halichoeres scapularis</i>       | 0.027 | 0.851 | 0.049 | 0.552 | 0.054 | 0.000 | 40 | 0.976 | 0.653 |
| A.SG/Soft Coral vs A.CR/A.RF | <i>Halichoeres sp.</i>              | 0.000 | 0.851 | 0.000 | NA    | 0.000 | 0.000 | 30 | 0.983 | 1     |
| A.SG/Soft Coral vs A.CR/A.RF | <i>Hemigymnus fasciatus</i>         | 0.006 | 0.851 | 0.020 | 0.301 | 0.000 | 0.012 | 38 | 0.987 | 0.945 |
| A.SG/Soft Coral vs A.CR/A.RF | <i>Hemigymnus melapterus</i>        | 0.000 | 0.851 | 0.000 | NA    | 0.000 | 0.000 | 34 | 0.991 | 1     |
| A.SG/Soft Coral vs A.CR/A.RF | <i>Hologymnosus annulatus</i>       | 0.003 | 0.851 | 0.016 | 0.192 | 0.006 | 0.000 | 32 | 0.995 | 0.37  |
| A.SG/Soft Coral vs A.CR/A.RF | <i>Hologymnosus sp.</i>             | 0.002 | 0.851 | 0.012 | 0.192 | 0.005 | 0.000 | 33 | 0.997 | 0.774 |
| A.SG/Soft Coral vs A.CR/A.RF | <i>Labrichthys unilineatus</i>      | 0.003 | 0.851 | 0.018 | 0.192 | 0.007 | 0.000 | 10 | 1.000 | 0.998 |
| A.SG/Soft Coral vs A.CR/A.RF | <i>Labropsis manabei</i>            | 0.000 | 0.851 | 0.000 | NA    | 0.000 | 0.000 | 1  | 1.000 | 1     |
| A.SG/Soft Coral vs A.CR/A.RF | <i>Labropsis xanthonota</i>         | 0.007 | 0.851 | 0.026 | 0.276 | 0.014 | 0.000 | 2  | 1.000 | 0.283 |
| A.SG/Soft Coral vs A.CR/A.RF | <i>Macropharyngodon meleagris</i>   | 0.020 | 0.851 | 0.052 | 0.393 | 0.013 | 0.030 | 7  | 1.000 | 0.798 |
| A.SG/Soft Coral vs A.CR/A.RF | <i>Macropharyngodon negrosensis</i> | 0.004 | 0.851 | 0.019 | 0.192 | 0.007 | 0.000 | 13 | 1.000 | 0.469 |
| A.SG/Soft Coral vs A.CR/A.RF | <i>Novaculichthys taeniourus</i>    | 0.015 | 0.851 | 0.034 | 0.446 | 0.020 | 0.012 | 18 | 1.000 | 0.474 |
| A.SG/Soft Coral vs A.CR/A.RF | <i>Oxycheilinus celebicus</i>       | 0.007 | 0.851 | 0.025 | 0.277 | 0.014 | 0.000 | 20 | 1.000 | 0.549 |
| A.SG/Soft Coral vs A.CR/A.RF | <i>Oxycheilinus digramma</i>        | 0.066 | 0.851 | 0.065 | 1.023 | 0.116 | 0.047 | 22 | 1.000 | 0.308 |
| A.SG/Soft Coral vs A.CR/A.RF | <i>Oxycheilinus sp.</i>             | 0.000 | 0.851 | 0.000 | NA    | 0.000 | 0.000 | 24 | 1.000 | 1     |
| A.SG/Soft Coral vs A.CR/A.RF | <i>Oxycheilinus unifasciatus</i>    | 0.000 | 0.851 | 0.000 | NA    | 0.000 | 0.000 | 29 | 1.000 | 1     |
| A.SG/Soft Coral vs A.CR/A.RF | <i>Pseudocheilinus hexataenia</i>   | 0.000 | 0.851 | 0.000 | NA    | 0.000 | 0.000 | 31 | 1.000 | 1     |

|                              |                                 |       |       |       |       |       |       |    |       |       |
|------------------------------|---------------------------------|-------|-------|-------|-------|-------|-------|----|-------|-------|
| A.SG/Soft Coral vs A.CR/A.RF | <i>Pseudodax moluccanus</i>     | 0.026 | 0.851 | 0.085 | 0.301 | 0.000 | 0.051 | 35 | 1.000 | 0.11  |
| A.SG/Soft Coral vs A.CR/A.RF | <i>Stethojulis bandanensis</i>  | 0.000 | 0.851 | 0.000 | NA    | 0.000 | 0.000 | 42 | 1.000 | 1     |
| A.SG/Soft Coral vs A.CR/A.RF | <i>Stethojulis interrupta</i>   | 0.009 | 0.851 | 0.032 | 0.277 | 0.018 | 0.000 | 43 | 1.000 | 0.818 |
| A.SG/Soft Coral vs A.CR/A.RF | <i>Stethojulis strigiventer</i> | 0.000 | 0.851 | 0.000 | NA    | 0.000 | 0.000 | 44 | 1.000 | 1     |
| A.SG/Soft Coral vs A.CR/A.RF | <i>Thalassoma amblycephalum</i> | 0.000 | 0.851 | 0.000 | NA    | 0.000 | 0.000 | 46 | 1.000 | 1     |
| A.SG/Soft Coral vs A.CR/A.RF | <i>Thalassoma hardwicke</i>     | 0.052 | 0.851 | 0.093 | 0.567 | 0.000 | 0.105 | 48 | 1.000 | 0.059 |
| A.SG/Soft Coral vs A.CR/A.RF | <i>Thalassoma jansinii</i>      | 0.000 | 0.851 | 0.000 | NA    | 0.000 | 0.000 | 49 | 1.000 | 1     |
| A.SG/Soft Coral vs A.CR/A.RF | <i>Thalassoma lunare</i>        | 0.059 | 0.851 | 0.039 | 1.512 | 0.141 | 0.173 | 51 | 1.000 | 0.019 |
