# Supplementary material for: Multi-Scale Coral Reef and Seascape Habitat Variables Combine to Influence Reef Fish Assemblages
Source: MDPI journal article supplement (doi:10.3390/fishes9040137), 2024-04-15
Supplement: s1 [file s1]

# Multi-scale coral reef and seascape habitat variables combine to influence reef fish assemblages

Katie T. Sievers<sup>1\*</sup>, Eva C. McClure<sup>1</sup>, Rene A. Abesamis<sup>2,3</sup>, Garry R. Russ<sup>1</sup>

<sup>1</sup> James Cook University, College of Science and Engineering, Townsville, Australia, 4811

<sup>2</sup> Silliman University-Angelo-King Centre for Research and Environmental Management, Dumaguete City, Philippines, 6200

<sup>3</sup> University of the Philippines-Diliman, Marine Science Institute, Quezon City, Philippines, 1101

\* Correspondence: katie.sievers@jcu.edu.au

Supplementary Tables and Figures:

**Appendix Table 1.** Average percent cover of benthic habitat at each site.

| Site       | Status | Rubble | Sand | Hard Coral | Macroalgae | EAM | Soft Coral |
|------------|--------|--------|------|------------|------------|-----|------------|
| Bino-ongan | Fished | 49%    | 9%   | 7%         | 24%        | 46% | 8%         |
| Bino-ongan | NTMR   | 19%    | 54%  | 3%         | 2%         | 33% | 3%         |
| Maite      | Fished | 11%    | 4%   | 42%        | 10%        | 20% | 4%         |
| Maite      | NTMR   | 4%     | 8%   | 62%        | 3%         | 14% | 4%         |
| Nonoc      | Fished | 43%    | 27%  | 19%        | 13%        | 33% | 2%         |
| Nonoc      | NTMR   | 12%    | 57%  | 19%        | 1%         | 18% | 3%         |
| Olang      | Fished | 56%    | 12%  | 17%        | 4%         | 62% | 1%         |
| Olang      | NTMR   | 52%    | 11%  | 20%        | 15%        | 49% | 1%         |
| Paliton    | Fished | 9%     | 1%   | 37%        | 15%        | 22% | 9%         |
| Paliton    | NTMR   | 5%     | 1%   | 28%        | 20%        | 23% | 15%        |
| Sandugan   | Fished | 34%    | 14%  | 21%        | 4%         | 35% | 21%        |
| Sandugan   | NTMR   | 38%    | 22%  | 18%        | 1%         | 42% | 9%         |
| Tubod      | Fished | 1%     | 4%   | 60%        | 11%        | 15% | 2%         |
| Tubod      | NTMR   | 2%     | 5%   | 27%        | 14%        | 22% | 16%        |
| Tulapos    | Fished | 52%    | 20%  | 3%         | 16%        | 44% | 14%        |
| Tulapos    | NTMR   | 25%    | 16%  | 7%         | 11%        | 44% | 17%        |

**Appendix Table 2.** Total area (km<sup>2</sup>) of each habitat within 500 meters of coral reef fish and benthic survey sites

| Site       | Status | Coral Reef | Sand  | Macroalgae | Mangrove | Reef Flat | Seagrass | Total |
|------------|--------|------------|-------|------------|----------|-----------|----------|-------|
| Bino-ongan | Fished | 0.095      | 0.064 | 0.026      | 0.007    | 0.012     | 0.122    | 0.326 |
| Bino-ongan | NTMR   | 0.103      | 0.055 | 0.031      | 0.008    | 0.014     | 0.143    | 0.353 |
| Maite      | Fished | 0.109      | 0.072 | 0.058      | 0.008    | 0.035     | 0.133    | 0.415 |
| Maite      | NTMR   | 0.084      | 0.078 | 0.072      | 0.008    | 0.039     | 0.100    | 0.380 |
| Nonoc      | Fished | 0.052      | 0.018 | 0.018      | 0.002    | 0.038     | 0.044    | 0.172 |
| Nonoc      | NTMR   | 0.062      | 0.020 | 0.021      | 0.001    | 0.042     | 0.029    | 0.175 |
| Olang      | Fished | 0.159      | 0.050 | 0.022      | 0.013    | 0.071     | 0.062    | 0.377 |
| Olang      | NTMR   | 0.110      | 0.069 | 0.018      | 0.012    | 0.085     | 0.068    | 0.362 |
| Paliton    | Fished | 0.120      | 0.012 | 0.034      | 0.000    | 0.084     | 0.314    | 0.564 |
| Paliton    | NTMR   | 0.119      | 0.003 | 0.040      | 0.000    | 0.074     | 0.318    | 0.553 |
| Sandugan   | Fished | 0.046      | 0.028 | 0.022      | 0.019    | 0.009     | 0.146    | 0.269 |
| Sandugan   | NTMR   | 0.037      | 0.033 | 0.023      | 0.006    | 0.008     | 0.165    | 0.271 |
| Tubod      | Fished | 0.084      | 0.022 | 0.091      | 0.006    | 0.035     | 0.020    | 0.258 |
| Tubod      | NTMR   | 0.095      | 0.019 | 0.104      | 0.006    | 0.030     | 0.000    | 0.253 |
| Tulapos    | Fished | 0.101      | 0.055 | 0.047      | 0.018    | 0.003     | 0.179    | 0.404 |
| Tulapos    | NTMR   | 0.103      | 0.062 | 0.033      | 0.049    | 0.011     | 0.188    | 0.446 |

**Appendix Table 4.** Pairwise post-hoc comparison tests from PERMANOVA analysis comparing the fish assemblage structure between habitat clusters for all species, parrotfishes, and wrasses. Bolded values are significant ( $p < 0.05$ ) highlighting differing fish assemblages. P-values are bonferroni adjusted p-values. A.MG/A.Sand is the area of mangrove and area of sand cluster. Rubble/EAM is the cluster group defined by rubble and the epilithic algal matrix (EAM). Coral/A.MA is the cluster for live coral cover and area of macroalgae. A.SG/Soft Coral is the cluster for the area of seagrass and soft coral cover. A.CR/A.RF is the cluster for the area of coral reef and area of reef flat habitats.

| Cluster Comparisons                       | All Species | Parrotfish  | Wrasse      |
|-------------------------------------------|-------------|-------------|-------------|
| Area.MG/Area.Sand vs Rubble/EAM           | <b>0.01</b> | <b>0.02</b> | 0.08        |
| Area.MG/Area.Sand vs Coral cover/Area.MA  | <b>0.01</b> | <b>0.01</b> | <b>0.01</b> |
| Area.MG/Area.Sand vs Area.SG/Soft Coral   | <b>0.01</b> | <b>0.03</b> | <b>0.01</b> |
| Area.MG/Area.Sand vs Area.CR/Area.RF      | <b>0.01</b> | 0.34        | <b>0.01</b> |
| Rubble/EAM vs Coral cover/Area.MA         | <b>0.01</b> | <b>0.01</b> | <b>0.01</b> |
| Rubble/EAM vs Area.SG/Soft Coral          | <b>0.01</b> | 0.16        | 0.43        |
| Rubble/EAM vs Area.CR/Area.RF             | <b>0.01</b> | 1.0         | 0.37        |
| Coral cover/Area.MA vs Area.SG/Soft Coral | <b>0.01</b> | <b>0.01</b> | <b>0.01</b> |
| Coral cover/Area.MA vs Area.CR/Area.RF    | <b>0.01</b> | <b>0.01</b> | <b>0.03</b> |
| Area.SG/Soft Coral vs Area.CR/Area.RF     | <b>0.02</b> | 0.07        | <b>0.01</b> |
